# Supplementary material for: Acute Myeloid Leukemia Expresses a Specific Group of Olfactory Receptors
Source: Cancers (Basel). 2023 Jun 6;15(12):3073. doi: 10.3390/cancers15123073 (PMC10296317; doi:10.3390/cancers15123073)
Supplement: Supplementary file 1 [file cancers-15-03073-s001.zip › Supplementary Tables.xlsx]

## Sheet: Table S1
Table S1. Patient's information available in the TCGA or Beat-AML.
			TCGA cohort	BEAT cohort
	Number of AML patients		151	58
	Age (years)		56 [21-88]	61 [1-85]
Clinical covariates	Sex	Male	83 (55.0%)	33 (56.9%)
		Female	68 (45.0%)	25 (43.1%)
	FAB	M0-M2	88 (58.3%)	7 (12.1%)
		M3	15 (9.9%)	1 (1.7%)
		M4-M7	47 (31.1%)	3 (5.2%)
		Not available	1 (0.7%)	47 (81.0%)
	Prior treatment	Yes	38 (25.2%)	Not available
		No	113 (74.8%)	Not available
	% BM blast		72 [30-100]	62.5 [0-98]
	% PB blast		39 [0-97]	47.5 [0-98]
	WBC count		17.0 [0.4-223.8]	23.8 [0.5-230.1]
Clinical outcome	Death event		87 (57.6%)	32 (55.2%)
	Time to death (months)		8.0 [0.0-56.1]	7.8 [0.3 - 25.7]
Mutations	NPM1		33 (21.9%)	19 (32.8%)
	FLT3		45 (29.8%)	15 (25.9%)
	RAS		8 (5.3%)	8 (13.8%)
	IDH1/2		26 (17.2%)	16 (27.6%)
Cytogenetic risk	Farovable		31 (20.5%)	Not available
	Intermediate		81 (53.6%)	Not available
	Poor		36 (23.8%)	Not available

## Sheet: Table S2
Table S2. OR genes with expression higher than 1 TPM in AML samples.
gene.symbol	TCGA-AB-2912	TCGA-AB-2823	TCGA-AB-2944	TCGA-AB-2925	TCGA-AB-2888	TCGA-AB-2966	TCGA-AB-2896	TCGA-AB-2952	TCGA-AB-2856	TCGA-AB-3007	TCGA-AB-2897	TCGA-AB-2861	TCGA-AB-2956	TCGA-AB-2880	TCGA-AB-2830	TCGA-AB-2841	TCGA-AB-2950	TCGA-AB-2898	TCGA-AB-3000	TCGA-AB-2908	TCGA-AB-2815	TCGA-AB-2916	TCGA-AB-2938	TCGA-AB-2892	TCGA-AB-2825	TCGA-AB-2977	TCGA-AB-2939	TCGA-AB-2893	TCGA-AB-2981	TCGA-AB-2919	TCGA-AB-3009	TCGA-AB-2891	TCGA-AB-2884	TCGA-AB-2806	TCGA-AB-2963	TCGA-AB-2885	TCGA-AB-2942	TCGA-AB-2877	TCGA-AB-2822	TCGA-AB-2973	TCGA-AB-2932	TCGA-AB-2917	TCGA-AB-2914	TCGA-AB-2998	TCGA-AB-2915	TCGA-AB-2844	TCGA-AB-2859	TCGA-AB-2936	TCGA-AB-2934
OR2W3	2.11587	17.1307	61.5126	5.90981	4.61473	16.2441	21.6677	31.5757	4.52696	15.0481	14.2748	0.179376	1.61307	21.8459	22.6833	31.5267	9.38372	36.8017	3.48274	12.0924	6.36922	4.85734	37.4984	3.40401	11.1036	27	13.2395	0.973535	4.26296	14.326	7.86222	3.07522	15.8366	16.9329	7.36756	69.5685	21.5063	6.05914	35.5983	1.2	4.41432	17.9287	34.943	18.4096	91.398	4.84524	34.7076	56.901	13.6496
OR2T8	0	1.9371	5.36283	0.872311	1.02173	2.98108	3.3817	1.10162	0.911178	3.23773	2.39433	0.180523	0.202923	3.72241	2.79758	2.61457	1.14469	9.52759	0.678387	1.12438	1.4338	0.95383	3.40493	1.58755	1.38113	9.26691	1.07452	0.27993	0.572026	2.65028	1.74342	1.7855	4.25737	2.44693	0.695122	9.00582	3.13393	2.1108	4.67726	0.371589	0.533103	3.20295	2.64322	3.06892	9.60538	1.52381	4.49253	4.53252	2.51393
OR52H1	1.03816	0.566646	18.5295	0.231974	0.271709	6.93878	2.7289	0.908909	0.0888469	2.64784	2.22854	0.528071	0.791462	1.81482	2.07317	0.413418	2.32533	1.96271	2.09469	1.03186	0.740152	1.16257	3.87342	0.733256	1.22428	0	5.02918	0.136477	1.02258	6.30553	2.74611	2.55347	1.17087	2.7268	1.05435	10.7643	0.859451	1.8295	3.10515	1.17757	0.433181	3.01902	3.02557	0.443324	2.3415	0.495278	2.2998	5.38971	1.75091
OR52B6	1.28936	1.0827	17.7022	0.369363	0.259579	4.21032	1.08628	1.02621	0.339522	2.33504	1.92628	0.588579	0.283548	0.8669	2.39759	0.263308	2.75469	2.87513	3.26507	1.23225	0.70711	1.55494	2.20268	0.467014	1.05266	0.804731	3.80369	0.521537	0.444058	3.35766	2.1238	1.77416	1.52536	2.44225	1.15118	7.03623	0.912315	2.29402	3.70816	0.95192	0.413842	2.38696	1.07056	0.741183	2.04245	0.662435	2.511	4.22226	1.25456
OR2L2	1.3841	0.0968548	19.3528	0.079301	1.02173	4.03888	0	3.72856	0.182236	2.50663	0.979499	0	0	4.65301	3.35709	0.211992	2.28938	6.03861	0	1.78577	0.337364	1.6692	7.47194	0.835553	0.627786	2.74866	9.02601	0	0.762701	3.81641	0	0.595166	2.94741	1.22347	1.46748	0	0.293806	3.16619	3.98065	0.0928972	0	10.5697	4.13721	1.2503	11.2759	4.8762	8.64812	12.271	1.34675
OR52N4	0.578446	0.263105	13.3013	0.430841	2.18677	2.1769	2.00621	1.91829	0.742562	0.662008	0.394193	1.79809	0.551238	1.47465	1.51992	0.383917	0.518256	2.30869	3.58328	0.718671	0.687335	1.72738	0.856432	0.378295	1.59168	1.28001	3.50272	0.570321	1.29492	6.14354	12.9936	5.28143	2.17463	9.97059	0.20981	2.10445	2.48304	2.12369	4.6858	0.42059	0.321815	2.32021	1.14468	1.8526	10.2103	0.643909	1.93229	5.30541	4.39011
OR13D1	0.864335	0.873647	2.41868	0.357654	0.25135	2.5155	2.31406	0.229311	0.16438	2.44944	2.15973	0.89559	0.732159	1.67884	1.21126	0.12748	2.66737	2.5419	2.85561	0.536932	0.684694	1.18301	2.21817	2.11031	0.679529	0	4.8462	0.126251	0.429981	2.0081	1.20969	0.751591	2.16628	1.49773	0.34834	0.393068	0.353358	0.740434	2.69296	0.418974	0.400724	2.21499	2.79887	1.84548	1.41264	1.55777	2.93795	2.59265	1.1338
OR2AK2	2.98028	0.164312	13.548	0.134532	0.0787882	2.12082	0.197827	1.29384	0.231869	1.86044	0.830849	0	0	2.36812	3.60698	0.23976	1.45645	3.52862	0.0959056	0.841534	0.143083	2.9329	7.14026	1.27575	0.745517	0.799378	7.10933	0	0.404345	2.78761	0.227514	0.504843	2.22232	1.8532	0.851687	0.862477	0.581508	1.59152	2.11034	0.630392	0	4.98092	2.1446	0.867726	9.47608	2.49894	3.906	6.18896	1.21852
OR2L5	1.80998	0.0968548	13.8734	0.317204	0.0928844	3.65423	0.23322	1.86428	0.0911178	1.04443	1.19717	0	0.101461	3.02446	1.90235	0.0706641	1.43086	2.01287	0	1.58735	0.337364	2.14612	7.09361	0.835553	0.502229	0.549732	6.44715	0	0.476688	3.60438	0.268219	1.19033	1.41912	1.04868	1.62195	0.29051	0.0979354	1.759	3.48307	0.0928972	0	4.2706	4.02228	0.454655	10.023	2.74286	8.42349	7.6279	1.25696
OR2L13	1.27221	0	15.4978	0.276376	0.369962	2.05875	0	2.70018	0.272194	1.352	0.487672	0	0	1.91122	1.83857	0	1.3773	3.0065	0	1.87699	0.125975	1.42468	3.06086	0.540805	0.250049	1.564	6.3663	0.0696857	0.474666	3.11407	0	0.414849	1.25005	0.913707	2.26879	0	0.43884	1.10931	2.62599	0.323761	0	4.41195	0.972697	0.622499	9.98049	3.64163	7.38123	3.90785	2.50326
OR52K2	2.71721	0.681887	0.82078	1.32597	2.61574	0.423139	0.410485	2.23723	0.721684	0.459568	2.01132	1.9064	1.25006	1.12608	0.0984789	0.310935	0.587632	20.7845	1.19401	0.232822	1.18757	29.3792	1.24853	2.57361	2.76238	0.414673	7.47041	0.246349	13.1724	0.0932939	1.77032	5.4472	2.11349	4.61441	2.03911	0.38349	0.430934	0.412795	0	26.488	7.6628	4.88577	1.4159	0.700199	5.88041	0.178801	0.395359	0.291863	2.44939
OR2L3	1.3841	0.19371	7.5779	0	0.185769	2.69259	0	2.20324	0.0911178	1.04443	0.3265	0	0	2.21018	2.01425	0.141328	1.52625	3.89155	0	0.925956	0	0.95383	3.31035	0.334221	0.125557	0.314133	6.12479	0.0699826	0.476688	2.12023	0	0.476133	1.74661	0.349562	0.540651	0.435765	0.293806	1.759	2.08984	0.185794	0	6.51266	0.574612	0.454655	8.14369	1.32064	4.2679	3.86923	1.25696
OR2B11	2.61988	0.381328	1.377	5.69795	5.21117	0.189304	0.803437	1.91838	3.40803	0	15.3185	5.59705	2.19705	0.686977	0.991292	0.069553	0.657236	0.528326	0.66772	0.716098	2.82251	1.76031	0.558566	1.72707	3.08958	0.541089	0.846104	0.61994	4.41042	1.46082	3.43202	0.468647	0.322341	0.774147	1.36838	0.857828	1.83151	2.42387	0.489757	1.73729	2.97342	0.420345	2.37542	0.783137	1.02765	1.89981	0.663284	0.435244	1.41394
OR2B6	0.424521	0.0965463	1.39454	0.632387	0.555532	0.0958576	0.232478	2.36516	0.181655	0.312331	0	0.179948	0	0.579774	2.78867	0.211317	3.99365	0.267528	1.35245	1.12079	0.33629	0.713094	2.54557	0.583024	0.125157	0	17.8874	0.488318	0.190068	0.634042	1.06946	0.237308	0.435262	4.09427	3.07959	1.73751	0.390494	2.57164	0.396797	0.0926013	0.619973	0.106425	2.06202	0.679811	1.76925	0.911375	2.46302	3.63651	1.43196
OR1F12	0.108905	0.0990704	0.2385	0.16223	0	1.67218	1.90844	0.260036	0.466011	0.427328	0.222646	0.0923261	0.311347	0	1.94587	0	0.487864	6.31401	0.925207	0.338264	0.258811	0.365869	0.677216	1.5384	0.256859	0	1.09911	0	0.292556	1.1928	1.37177	0.730538	1.22827	1.25145	0.711024	0.74289	0.500879	0.959592	1.52689	0	0.181766	0.764451	0.587757	0.116264	0.213589	1.24694	2.52741	4.52313	1.46939
OR2G3	0.1075	2.73818	2.70736	0.0800684	0	6.11695	5.7692	0.17112	0	0.632721	0.769205	0	0	1.64431	0.112986	0.142696	0	1.49039	1.02743	0.801357	0.0851573	0	4.39285	0.421819	0	0.0792932	0.216985	0.0706598	0.481301	1.28445	0.270815	0	0.11022	0.970597	0.155966	7.33304	0.593299	4.38085	5.92827	0.0937962	0	0	3.0169	0.459055	2.00292	0.410282	2.1546	0.669715	0.271956
OR9A4	2.46964	1.33133	0.100157	0.0681277	10.4535	0.0826147	0	0.291202	0.234839	1.43563	3.55296	0.0775438	0.610161	0.199871	0	1.82123	3.27802	1.38341	3.59396	0.0568209	3.40551	0.512149	0.243766	4.5223	0	0	0.369251	0.661345	0.16381	0.364299	3.57163	0.306786	0	24.7005	3.05226	0.124789	0.841366	0	0	1.11732	18.0906	0.733777	1.08603	8.49546	0.179392	0.960015	0.289466	0	0.077133
OR56B1	0.410153	0	6.06304	0.229119	0.626184	0.740906	0.112305	0.326445	0.175507	0.201173	0	1.47779	0.0977151	0.448121	0.754398	0	0.183737	0.646183	1.19779	0.509581	0	0.344479	0.364357	0.16094	0.725528	0.151267	0.20697	0.0673986	0.36727	1.02097	2.97063	1.37566	0.210265	3.02989	0.37192	3.4973	0.282958	0.564683	1.43763	0.0894671	0.0855699	0.308468	0	0.656802	3.31819	0.0978365	0.432665	1.38408	1.03762
OR52K1	1.26182	0.353191	0.743982	0.433769	0.762103	0	0.106308	0.386266	0.498405	0.380861	1.58749	0.329147	0.184995	0.424192	0.102016	0	0.086963	4.64876	0.412301	0	0.307558	10.4347	0.172451	2.13285	0.686786	0.644353	1.27347	0.127599	2.60744	0.0966453	0.244522	0.976651	0.597112	2.54942	0.211236	0.132422	0	0.427624	0	6.69049	3.80703	1.07066	0.209538	0.310865	3.42655	0.0926122	0.307171	0	0.327403
OR2G2	0.314386	3.43195	2.40975	0	0.182848	3.97538	3.32852	0	0	0.514003	0.321366	0	0	0.91597	0	0	0	1.4529	2.11445	0.650998	0	0	3.44449	0	0.617915	0	0.105763	0	0.375355	0.9391	0.396002	0	0.107447	0	0.0760214	5.28994	0.385582	1.61592	4.79962	0	0	0	0.452462	0.559383	1.54147	0.19998	1.65821	0.326433	0.353486
OR10AD1	0.995917	0.0696909	0.503318	0.399422	0.267336	2.07581	0.419529	0.243895	0.131126	0.601206	0.15662	1.10409	0.65705	0.167401	1.2883	0	0.617737	2.22079	0.406772	0.237951	1.03168	1.63001	1.90555	0.661335	0.542061	0	1.46901	0	0.685993	1.83071	1.15797	0.770843	0.392737	0.69169	0.222297	1.46324	0.422811	0.675023	0.358029	0.868962	0.0639315	1.38279	0.578839	0.0817857	0.676121	0.365481	1.05058	2.70452	0.646026
OR52N1	0	0.188882	11.0267	0.0773246	0	0.656371	1.02334	2.72673	0	0	0	0.176024	0	0.680557	0.763799	0	0.27904	1.17762	0.66148	0.322457	0.0822391	0.581287	2.49006	0	0.856996	0.076576	0.104775	0	0	2.06739	0.653836	0.580334	3.72549	1.70425	0	1.13308	0	0	1.84368	0	0	0.312312	0.112058	0.110831	4.17398	0	1.42368	0.538971	1.48827
OR2A7	0.0895831	0.977921	1.56949	0.266895	0.234458	0.485472	2.551	1.6399	0	0.087878	0.641004	0	0.597586	0	0.94155	0	0.160523	1.46781	0.0951322	1.2243	0	0.401275	0.636645	0.0703032	1.79594	0.198233	0.271231	0.17665	0.561518	0.445988	0.112839	0.70108	2.84734	0.588241	0.714846	3.66652	0	0.493339	0.0837327	0.312654	0.448552	6.10856	0	1.91273	0.790625	0.854754	1.512	1.02318	0.22663
OR10A2	0.284828	0	1.87131	0	0.0828286	0	0	0	1.05629	0	0	0.482937	2.44288	0	3.3928	0	0	0.119664	0	0.117959	0	0	0.168684	0	0.223928	0	0	0.187218	0	0	7.5342	0.212293	0	0	1.92847	6.34695	0	0	1.15365	0	0.55462	2.47536	0	0	0.372412	0.815304	1.60246	0	0.480378
OR10A5	0.284558	0	2.28499	0	0	0	0	0	0.162352	0.0930473	0.0969587	0.562892	1.62704	0	3.28989	0	0	0	0	0	0	0.10622	0.168524	0	0.447432	0	0	0.187041	0.0849356	0	9.31921	0	0	0	1.44498	7.63499	0	0	0.443291	0.331045	0.237469	1.14139	0	0	0.279044	1.44805	1.80106	0	0.0799871
OR5B21	0.429537	0.097687	0.94068	0.31993	0.655778	0.0969902	1.99941	0.427341	0.459504	0.10534	0.219537	0.546222	0.511666	0.23465	1.24151	0.427628	0.0962104	0.135345	0.342108	0.200124	0.680527	4.56963	0.476971	4.46648	1.26636	0	1.08376	0.0705839	0.769255	0.320767	0.135262	1.08051	0.330304	0.352565	0.311598	0	0.592661	0.354822	0	1.78021	0.44807	0.538412	0.927279	0.114641	1.15834	0.307381	0.226557	0.445997	0.905546
OR52N2	0	0.175742	3.91348	0	0.0842691	1.5704	2.01009	0.691921	0	0.0947554	0	0.0818893	0.0920505	1.16089	0.203047	0	0.173086	0.852213	0.410309	0.900075	0.153036	0.540849	0.858087	0	0.569557	0.142498	0.0974858	0	0.0864948	1.44268	1.70338	0.539963	0.792304	2.77496	0.910935	0.658911	0.266554	0	2.79886	0	0.0806093	0	0	0.412484	0.663056	0.0921648	3.87204	0.702068	0.488732
OR10A4	0.100477	0	1.98039	0	0.0876568	0	0	0	0.515937	0.197129	0	0.255544	0.670257	0	2.00649	0	0	0.126639	0	0.0624173	0	0	0	0	0.118491	0	0	0	0	0	4.55622	0.337002	0	0	1.38489	3.70116	0	0	0.563491	0.263006	0.25155	1.91436	0	0	0.295591	0.57522	1.80187	0	0.16946
OR3A2	0	0	0	0	2.75597	0	0	3.40173	0	0	0	0	0	0	0.292965	0	0	3.86449	0	0	1.47205	0.728337	0	0	0	0	0	0.0610721	0	0	0	0	0	0	0	0	0	0.102336	0	0.324277	0	0.0931712	0	0.0991918	0	0	0.392053	0	0.0783516
OR1Q1	0	0.577439	0.463372	0	0.0922947	3.34437	0.11587	0	0.181079	0	0.97328	0	0	0.115587	1.33431	0	0	0	0.112347	0.13144	0	0.236944	3.9472	0.249074	0	0	1.60155	0.139076	0	0.526691	2.79842	0	0.325411	0.173671	0	1.15466	0	0.233044	0.0988843	0	0.176573	0.106087	0.114193	0	1.14118	0.100942	0	0.109847	0
OR52N5	0	0	10.3754	0	0.0843506	0.611301	0.317689	1.53909	0	0	0	0	0	0.528189	0	0	0.173253	0.731175	0.513383	0	0	0.433098	1.37427	0	0.342064	0	0	0	0.173157	0.962714	1.09609	0.108097	1.28874	1.34914	0	0	0.35575	0	0.813357	0.0843621	0.161375	0.193912	0	0	0.284442	0.276762	0.917949	0.501962	0.815342
OR2B2	0.32995	0	0.541939	0.122877	0.143925	0	0	0.131305	0.141187	0	0.0843188	0	0	0.0901233	1.04037	0.0547472	0.812946	0.20793	0	0.563661	0.392061	0.64661	1.17244	0.129469	0.0972758	0	1.91473	0.162657	0.0738631	0	0.727311	0.0922213	0.0845745	1.62494	1.31645	0.225074	0.227627	1.09023	0	0.0719723	0.206512	0	0.534218	0	0.161778	0.0787051	0.34806	0.770835	0
OR1L8	0.1075	0.391168	0.706268	0	0	3.00993	0.941909	0.17112	0.0919996	0	0.879092	0.0911348	0	0.234902	0.56493	0.142696	0.385255	0.40647	0.342476	0.400679	0	0	5.53881	0.421819	0.126772	0	0.433969	0.14132	0	0.428149	1.35407	0.600926	0.220439	1.14707	0	1.17329	0	0.118401	0.703354	0	0.0897104	1.07798	0.116035	0	0.421667	0.615423	0.3402	0.781334	0
OR2T33	0.103816	0.661087	0.795744	0.154649	0	0.468836	0.909632	0.578397	0.266541	1.12024	0.424484	0	0	1.02084	0.327342	1.72257	0.0930134	1.57017	0.33074	0.322457	0.411196	0	0.922243	0.0814729	0.122428	1.76125	0.314324	0	0.464808	0.620216	0	0.3482	0.957984	0.426062	0.225933	2.12453	0.477473	0	0.194072	0.090582	0.346545	0.208208	0.67235	0.554155	2.03609	0.396223	1.20466	0.862353	0.437728
OR10H1	0.177891	0.404567	0.0973946	0	0	0	0.0974172	0	0.152241	0.436262	2.00025	0.0754052	0	0.291538	0	0.0590334	1.59381	0	0.0944551	0	0	0	1.97536	0.0698028	0	0.0656073	0.0897668	0.116928	0	0	12.6601	0.0994415	0.091196	2.77426	0.19357	0.121347	1.14543	0.489827	0	0	0	0	0.672051	0.284867	0.087222	0.254601	0.0938275	0	0
OR3A1	0	0	0	0	2.07663	0.0934761	0	3.70672	0	0	0.105791	0	0	0.226148	0	0	0	3.26102	0.109904	0	0.901821	0.231793	0.0919379	0	0	0.458029	0	0	0	0	0	0	0	0	0	0	0	0	0	0.722405	0	0	0	0	0	0	0.327522	0	0.174547
OR7D2	0.0310095	0.112837	0.169776	0.161677	0.108212	0.28008	0.203778	0.0987232	0.079615	0.273774	1.90188	0.0788667	0.0591019	0.237161	0.195553	0.102906	0.111131	0.234502	0.395165	0.0577902	0.171952	0.138903	0.247924	0.0486715	4.38827	2.47029	6.0088	0.163061	2.49907	0.216133	0.195299	3.2242	0.127177	0.152716	0.157466	0.169224	0.057048	0.204925	0.46375	0.216453	0.077634	4.29119	0.066943	3.93949	0.0608173	0.207114	0.196269	0.0643957	3.79169
OR51J1	0	0.286898	3.56847	0.0783003	0	1.42426	0.115139	0.0836707	0.359872	0.515625	0.5373	0.267367	0	0	0	0.0697724	0.188374	0.397494	0.558189	0.13061	0.166554	0.470897	0.093388	0	0.247946	0.310169	0.106097	0.138199	0.282404	0.104674	1.19175	0.705188	0.215572	0.862877	0.228784	1.43422	0	1.04208	0.393042	0	0.175459	0.632506	0.113472	0.11223	0.824711	0.300917	0.221792	1.2007	0.443251
OR2AE1	0.746777	0.509505	0	0.0695272	0.570055	1.01174	0.715666	0.148592	0.559213	2.10612	0.954196	0	0.355825	0.611929	0.098111	0.0619548	0.669071	2.35305	0.892164	0.28994	0.887353	0.731737	0.0829244	0.293029	1.8714	0	0.659463	0.306786	0.417937	0.0929455	0.587903	0.41745	0.095709	0.766196	0	0.382058	0	0.102813	0.349003	1.8733	0.934797	1.02967	0.806066	0.597929	0.0915383	0.178134	2.16636	0.872318	0.236152
OR6A2	0.172817	0	1.7031	0	0	0.15609	0	0	0	0.0847639	0	0	0.741098	0	1.36228	0	0	0	0	0	0	0	0.0767606	0	0.1019	0	0	0	0	0	3.59174	0	0	0	0.564148	4.3618	0	0.0951713	0.0807655	0	0.288438	0.779836	0	0	0.0847343	0.247339	1.36727	0	0.145733
OR2D2	0.900674	0	1.08485	0	0	0	0	0	0	0.088353	0	0.0763562	0.429154	0	1.32529	0	0	0	0	0	0	0.100861	0.160022	0	0.212429	0	0	0	0	0	4.19763	0.201391	0	0.0739275	0.522698	2.70332	0	0	0.505112	0.314344	0.150325	0.541904	0	0	0.353288	0.515625	0.0950109	0	0.0759517
OR13G1	2.16396	0.393708	0.82933	0	0	0.097725	0.711019	0	0	0.849107	0.553	0	0	0.236427	0.796037	0.0718112	1.74491	0.27274	0.1149	0.268854	0.0857103	0.121164	2.59516	0.339647	0.127595	0	0.218394	0	0.0968854	0.538661	0	0	0.110935	1.15452	0.156979	0.885679	0.895727	0.715021	0.404527	0	0	0	3.854	0.231018	1.16711	0	0.798956	0	0
OR11L1	0.103173	0.0938562	1.12974	0.153692	0	0.0931867	0.565	0.164233	0	0.809674	0.316391	0	0	0.112724	1.08439	0	0.462187	0.260074	0	0	0.32692	0.115537	1.55811	0	0.24334	0	0.104126	0	0	0.513646	0	0	0.211567	1.94775	0.224534	1.54834	0.949033	0	0.0964352	0	0	0	3.4523	0	0.50587	0	1.85021	0.107127	0
OR1J4	0.10613	0.868917	0	0	0	2.10887	0	0.0844701	0.0908276	0	0.216973	0	0	0	0.66928	0.140878	0	0	0	0	0	0.118849	6.03394	0.916181	0.125157	0	0.321331	0.279039	0	0.317021	2.00523	0	0	0	0	1.01355	0	0	0	0	0.619973	0	0	0.113302	1.04074	0	0	0	0
OR1K1	0.105126	0.0956326	0.805785	0.313201	0.183425	0.474752	0.115139	0.334683	0.269904	0.721874	0.32238	0	0.200362	0.344572	0.220982	0	0.282561	1.19248	0.223276	0.0653051	0.416384	1.05952	0.747104	0.247503	0.247946	0	0.848773	0.0690995	0.0941347	0.523368	0.529669	1.29284	0.646715	0.517726	0.228784	0.860534	0.0966996	0.34736	0.982604	0	0.175459	0.94876	0.794306	0.448918	0.618533	0.200611	0.776272	0.764081	0.354601
OR2D3	0.186869	0	0.20462	0	0	0.0843905	0	0.148731	0	0	0	0	0.356158	0	1.37484	0	0	0.117762	0	0.116084	0	0	0.0830019	0.0733256	0	0	0	0	0	0	3.17764	0	0	0.0766912	1.49116	3.18679	0	0	0.0873324	0	0.233918	2.24865	0	0	0.0916239	0	0.985627	0	0.157582
OR1J1	0	0.750849	0	0	0	3.54109	0	0	0	0	0.632783	0	0	0	1.4097	0.205429	0	0	0	0	0	0	5.4992	0.242905	0	0	0.833006	0	0.092386	0.821834	1.8194	0.115348	0	0.0846848	0	0.985307	0	0.454543	0.0964352	0	0.0860997	0.10346	0.111364	0	1.21409	0	0.108836	0.214253	0
OR2C1	0	0.323423	0.778603	0.105923	0.124066	0.321116	0	0.792313	0.18256	0.558019	0.218054	0	0.474328	0.077688	0.373673	0.0471932	0.127414	0.62734	0.302041	0	0.506946	0.0796272	0.505332	0.279013	0.335415	0.36714	1.29172	0.093476	0.254686	0.0707999	0.626957	0.635973	0.29162	0.583638	0.103164	1.35813	0.0654063	0	0.33231	0.558374	0.237356	1.35476	0.230253	0.379553	0.069728	0.542763	0.150017	0.369153	0.119924
OR2H2	0.0631154	0	0.691108	0.517108	0.110124	0.0570062	0	0.401873	0.10803	0.185742	0	0.428058	0.18044	0	0.199009	0.0418899	0	0.0795491	0.067025	0.156831	0.349984	0.777471	3.42016	0.396255	0.372153	0.139664	0	0.207429	0.621681	0.0628438	0.318002	0.282253	0	0.0518053	0	0.344431	0	0.139032	0	0	0.948076	1.39239	0.0681263	0.0673803	0	0.0602213	0.199739	0.196602	0
OR5C1	0	0.283323	0.568388	0.309299	0	0.656371	0.454816	0.0826281	0	0.10184	0.530605	0.176024	0.197865	0.226852	0.545571	0.137806	0.186027	0.785083	0.220493	0.128983	0.164478	0.348772	0.737795	0.162946	0.489712	0.306304	0.419098	0.409431	0.278885	0.206739	1.04614	0.116067	0.319328	0.511275	0.225933	1.13308	0	0	0.194072	0	0.346545	0.416416	0	0.443324	0.814434	0.198111	0.438057	0.862353	0.175091
OR14K1	0.952141	0.19248	0.115843	0	0	0	0	0.168404	0	1.45292	0.648854	0	0	0.115587	0.667155	0.210646	0.37914	0.133339	0	0.0657198	0	0	1.22175	0	0.24952	0	0.21354	0	0	0	0.266516	0	0.10847	1.2157	0.0767454	1.15466	0.0973135	0.349566	0.0988843	0	0	0.318261	4.11094	0.112942	0.726204	0	0.3348	0	0
OR1N2	0.0896635	0.570965	0.196362	0	0	1.61969	0.0982036	0	2.45552	0.175914	0.366617	0	0	0	0.471197	0	0	0	0	0.0556997	0	0	4.06225	0.140733	0.105738	0	0	0	0.160578	0.357111	1.24235	0	0	0.220788	0	0.366981	0	0.197512	0.0838078	0	0	0.0899123	0	0.0957223	0.175852	0	0	0.186199	0
OR13F1	0.416562	0.0947361	0.114033	0.155133	0	0	0.342178	0	0.0891246	0.715107	0.319358	0.176574	0	0.341342	0	0.276473	0.46652	0.262512	1.99064	0	0.0824961	0.233241	0.0925125	0.0817275	0	0	0.630612	0	0	0.103692	0.524703	0	0.427101	0.940266	0.377731	0.284155	0.095793	0.114701	0.778714	0	0.0869069	0.313288	1.23649	0.111177	0	0.19873	1.20842	0	0.175638
OR1J2	0	0.579278	0	0	0	1.05443	0	0	0.181655	0	0.216973	0	0	0	1.45011	0.070439	0	0	0.112704	0	0	0	2.82841	0.0832892	0	0	0	0	0	0.211347	0.401047	0	0	0	0	0	0.0976235	0.116893	0	0	0	0	0	0	1.45703	0	0.111956	0	0
OR1C1	2.11587	0.0962398	0.115843	0	0	0.191107	0.11587	0	0	0.10378	0.324427	0	0	0	0.778348	0.0702154	0.473925	0	0	0	0.167611	0	1.03379	0	0.24952	0	0.21354	0	0.0947324	0	0	0	0	0.78152	0	0.288666	0.681195	0.233044	0	0	0	0	4.79609	0	0.31123	0	0.558001	0	0
OR2A1	0.107154	0.682343	0.234666	0	0.186964	0	1.52568	0.51171	0.0917038	0.210229	0.109533	0	0.204228	0.117073	0.112623	0	0.0960042	0.270109	0	0.066565	0	0.119996	0.190379	0	1.76911	0	0.108143	0	0	0.213386	0	0.95839	0.439461	0.263857	0.0777325	0.438568	0	0	0.100156	0	0.44711	0.644709	0	1.02955	0.210155	0	0.678213	0.22252	0.180721
OR2M4	0	0	1.52044	0	0	0	0	0.170023	0	0	0	0	0	0.350094	0	0	0.191393	0.673108	0	0.0663517	0	0.119611	0.0948846	0	0	0	0.538984	0	0	0.425404	0.134539	0	0	0.263011	0	0.291441	0	0	0.299505	0	0	0.74975	0.230581	0.228056	0.418964	0	0.225346	0.221807	0.0900709
OR51B4	0	0.185039	9.02055	0	0.266181	1.28603	0.111391	0.161894	0	0.199536	0.103962	0	0	0	0.106894	0.0675011	0.182242	0.897294	0.432014	0.0631792	0.0805659	0	0.722784	0	0.239874	0	0.410571	0	0	0.303798	0.38432	0.454821	0.312831	0.66783	0.147557	2.77507	0	0.336052	0.855555	0	0	0.50993	0.219557	0	1.09706	0	0.107286	0.633606	0.171529
OR2C3	0.106545	0.129231	0	0.0529049	0	0.0962322	0.272284	0.113067	0.0607883	0.034839	0.290428	0	0	0.0388026	0	0.683572	0.859126	0.134287	0.0754299	0.463307	0.0281337	0.159085	3.12341	0.0278715	0.0418821	0	0.645173	0.0233441	0.0636036	0.0353622	0.0447349	0	0	2.24461	0.0257636	0	0.326683	0	0.0663912	0.154939	0.0296379	0	0.0766694	0.0379149	2.19409	0	1.01154	0.036876	0
OR2A4	0	0	0.117333	0	0.0934818	0.0967823	1.40832	0	0	0.105114	0	0	0	0	0	0	0.0960042	0	0.113792	0	0.509301	0	3.42683	0.588648	0.126365	0	0	0	0.191902	0	0	0	0	0.35181	0	0.584757	0.295696	0	0.200312	0	0	0.107452	0	0	0	0.204481	0	0	0
OR52D1	0.093873	0	5.13951	0	0	0.847867	0.102814	0.0747144	0	0.276259	0	0.0795825	0.0894575	0.205126	0.197328	0	0	0.473261	0	0.116629	0	0.420491	0.583741	0	0.221405	0	0.284219	0	0.168117	0.747753	0.945944	0.10495	0.384993	0.693461	0.136196	1.02456	0	0.516963	0.263227	0.24572	0	0.282401	0.101326	0	0.46027	0	0.0990255	0.584821	0.237483
OR2AG2	0.187044	0	0.819245	0	0	0.168939	0	0.0744349	0	0	0.0955982	0	0.534737	0	0.688062	0	0	0	0.0993148	0	0	0	0.249239	0	0	0	0	0	0	0	1.88481	0	0	0.0767629	0.814119	2.04145	0	0.206012	0.0874141	0.0816	0.312182	0.187563	0	0	0.183419	0	0.78924	0	0.157729
OR13C3	0	0	0.0988011	0.0672054	0.078717	0.325985	0.197648	0	0	0.35405	0	0.076494	0.0859858	0.591495	0.284504	0	0.485046	0.568618	0.479095	0.0560516	0	0.30313	0.240466	0.212432	0.106406	0	1.18382	0.0593083	0.0807961	0	0.227308	0.100877	0.0925129	0.444366	0	0.1231	0	0	0.421686	0	0	0.180961	0.0973936	0	0.353926	0.258278	0.285547	0.843188	0.304355
OR2M3	0	0	2.798	0	0	0.0961639	0	0	0	0	0	0	0	0	0.223806	0.0706641	0.0953907	0.268383	0.113064	0	0	0.119229	0	0	0	0.0785332	0.322357	0	0.0953377	0	0	0	0	0.0873904	0	0	0	0	0.398065	0	0	0.320295	0.229845	0	0.104406	0.101587	0.33694	0.221099	0.0897831
OR1L4	0.747675	0.19433	0.35087	0.238665	0	0.48236	0.467936	0.170023	0	0.104778	0.218364	0	0.203573	0	0.561308	0	0.0956965	0.403865	0.340281	0.0663517	0.253834	0.239222	0.569308	0	0.12596	0	0	0.210621	0	0.106351	0.134539	0	0.219026	0.438352	0.309933	1.16577	0.0982493	0.235285	0.0998351	0.279585	0.267406	0.428428	0.345872	0.114028	0.418964	0.101913	0.225346	0.665422	0.0900709
OR51I1	0.528967	0.19248	4.63372	0.236392	0	0.955533	0.23174	0.084202	0	0.207559	0.108142	0.0896882	0	0.231173	0	0	0.0947851	0.133339	0.224693	0	0	0.236944	0.093981	0.332099	0.12476	0	0.10677	0	0	0.421353	0.266516	0.236555	0	0.607849	0.0767454	1.01033	0.0973135	0.582609	0.395537	0	0	0.106087	0.114193	0	0.207487	0	0.1116	0.109847	0.0892131
OR6F1	1.29417	0.490543	0.354277	0	0	0.194817	0	0.343348	0	0.846359	0.661453	0	0	0.117831	0.226703	0.0715788	0.579753	0.135929	0.114528	0.0669959	0.0854329	0	1.6287	0.253911	0	0	0	0	0	0.107384	0	0	0	0.53113	0.234707	0.588542	1.09123	0.237569	0	0	0	0	5.12204	0	0.211516	0	0.682603	0	0
OR6K3	0	0	0	0	1.31353	0	0	0.159781	0.171806	0.393863	0.102605	0	0	0	0.210998	0	0.0899316	0.126512	0.319782	0	0	0.112405	0.445843	0	0	0	0.202606	0.0659775	0	0	0	0	0	0	0.0728157	0	0	0	0.0938209	0	0.0837657	0.100655	0	0	1.77176	0.0957737	0	0.104223	0.16929
OR2AJ1	0	0.645012	0	0	0	0.914872	0.443757	0.161238	0.0866865	0.298091	0.621243	0	0	0.442672	0.319383	0.0672275	0	1.02132	0.215132	0.0629232	0.401197	0	0.629873	0.0794918	0	0.0747139	0	0	0.181402	0.806846	0.255175	0	0.623127	0.166281	0.146959	0.690955	0.37269	0.111563	0.378706	0	0.0845295	0.609436	0.984001	0	0.496644	0.096647	0.213702	0.210346	0.0854168
OR6C2	0	0	1.86533	0	0.185769	0	0.11661	0	0.546707	0	0	0	0	0.23265	0	0	1.14469	0	0	0	0	0	0	0	0	0	0	0	0	0.106011	0	0	0	0.174781	0	0	0	0	0.0995161	0.0928972	0	0.106765	0	0	0	0	0.112313	0	0
OR14A2	1.37531	0	0	0	0	0	0	0	0	0.622678	0.108142	0	0	0.115587	0.88954	0	0.663495	0	0	0.0657198	0.0838056	0	0.751848	0.249074	0.12476	0.0780345	0	0	0	0	0	0	0	0.521013	0.153491	0.288666	0.291941	0.116522	0	0	0	0.742609	6.16641	0	0.31123	0	0.2232	0	0
OR13A1	0.0459866	0.836676	0	0.0685038	0.160476	0	0.201466	0.0732023	0	0.180445	0.141023	0.0389859	1.88441	0.452192	0.145	0.366257	0.164806	0.115921	0.0488351	0.0857017	0.291431	0.0514976	0.163408	0.108268	0.216924	0.135681	0.139233	0.0604541	0.0411785	0.0457887	0.289625	0.308479	0.471501	0.301967	0	0.250956	0.084601	0.15195	0	0.320995	0.11513	0.138343	0	5.64581	0.315668	0	0.145532	0.668483	0.271456
OR13C4	0.208934	0	0	0	0	0	0.228834	0.0831462	0.089404	0.204957	0	0.0885636	0	0.228275	0	0	0.28079	0.395002	0.110938	0.129791	0	0.116986	0.37121	0.245951	0.246391	0	0.421726	0	0	0	0.131587	0	0.10711	0.685973	0.227349	0	0	0	0.0976444	0	0	0	0.338283	0.223052	0	0	0	0.10847	0
OR1N1	0	0.0968548	0.116583	0	0	1.73095	0	0	0	0	0.108833	0.0902613	0	0	0.447612	0.0706641	0.0953907	0.268383	0	0	0	0	4.067	0.167111	0	0	0.107452	0.209948	0	0.318034	1.07288	0	0	0	0	0.581021	0	0	0.0995161	0	0.177701	0	0.114922	0	0.417625	0	0	0	0
OR52W1	0.44872	0.571478	0.0982689	0.20053	0.234879	0	0.294875	0.285712	0	0.264107	0.0917365	0	0.513136	0.0980515	0.47162	0.17869	0.241217	0.904889	0.190606	0.0557497	0.142184	0.301497	0.398618	0.211288	0.3175	0.132393	0.452863	0	0.723248	0.446789	0.339126	0.100334	0.184029	0.147324	0.130205	0	0.0825505	0.0988448	0.335532	0.783038	0.0748929	0.179986	0.0968691	0.287425	0.264015	0.0856289	0	0.652281	0.302716
OR13C8	0	0.0944409	0.227355	0.0773246	0.0905696	0.187535	0.113704	0	0.177694	0.509199	0.424484	0	0	0.226852	0	0	0.27904	0.261694	0.99222	0.128983	0.164478	0.116257	0.0922243	0.244419	0	0	0.523873	0.0682384	0	0.103369	0.130767	0	0.106443	0.596487	0.0753109	0.141635	0.0954946	0.343032	0.388144	0	0	0.416416	0	0.110831	0.203609	0.0990556	0.547571	0.538971	0.0875455
OR6J1	0	0.348455	0	0	0.250628	0.432461	0	0.228652	0	0.845447	0	0	0	0	0.201297	0.0635571	0	0	0	0	0.0758585	0	0.170138	0.300607	0.112929	0.0706347	0	0.0629441	0	0	0	0.107062	0	1.25762	0.138936	0.130646	2.29022	0.105472	0	0	0	0.288081	0.930277	0	0	0.365481	0	0.298293	0
OR1E2	0	0	0	0	0.448655	0	0	0	0	0	0	0	0	0	0	0	0	0	0.109226	0	0	0	0.182741	1.13006	0	0	0	0	0	0	0	0	0	0	0	0	0	0	0	0	0	0	0	0	0	0	1.4105	0	0
OR13C9	0	0.095033	0.228781	0.0778094	0	0.377421	0.343251	0	0	0.717349	0.213572	0	0	0.114137	0.109798	0	0	0.263335	0.776565	0	0	0.233972	0	0	0	0	0.210863	0.205999	0	0.208035	0.263174	0.233589	0	0.428733	0	0	0	0.115061	0	0	0	0.523784	0.563804	0	0	0.0996767	0.330602	0.10847	0
OR3A3	0.310481	0	0	0	0.451441	0	0	0.164743	0	0	0	0	0	0	0	0	0	0	0	0.0642911	0.0819837	0.231793	0.0919379	1.6244	0	0	0	0	0.092673	0	0.130361	0.115706	0	0	0	0	0	0.113989	0	0.0903007	0	0	0.223421	0	0	0	1.52844	0	0
OR13H1	0.107848	0	0	0	0	0	0	0	0	0	0	0	0	0	0	0	0.579753	0	0	0	0	0	0	0	0	0	0	0	0	0	0	0	0	1.85895	0	0	0	0	0	0	0	0	0	0	0	0	0	0	0
OR1L6	0	0	0.524289	0	0.250628	0.77843	0.104882	0.152435	0	0.187877	0.0978874	0	0.182514	0.104626	0.301945	0	0.25739	0.482781	0.305079	0.237951	0.0758585	0.214475	0.510414	0.45091	0.225859	0	0	0.188832	0	0.0953493	0.120621	0.321185	0.0981842	0.471607	0.208403	0.391938	0.616599	0.105472	0	0	0.159829	0.384108	0.103364	0.102232	0.187811	0.365481	0.404069	0	0.0807532
OR1L3	0.205076	0.0932786	0.224557	0.152746	0.0894549	0.648293	0.112305	0	0	0	0.20963	0.0869286	0	0	0	0.068055	0.0918686	0.129237	0.10889	0	0	0	1.18416	0.402351	0.362764	0	0	0	0	0	0.387473	0	0.105133	0.336655	0	0.139892	0	0.112937	0.0958417	0	0	0.411291	0.110679	0	0.301654	0.293509	0.324499	0.212935	0
OR2AT4	0	0.0872808	0	0	0	0	0	0.0763636	0	0	0	0	0	0	0	0	0	0	0	0	0	0	3.15359	0	0	0	0	0.189195	0	0.0955323	0.120853	0	0	0	0	0	0	0	0.0896791	0	0	0	0	0	0	0.183091	0	0	0
OR8D4	0	0	0.164495	0	0	0	0	0	0	0.0736828	0	0	0	0	0	0	0	0	0.0797652	0	0	0	0	0	0	0	0	0.0493716	0	0	0.189224	0.0839762	0	0.0616526	0	0	0	0	0	0	0	0	0	0.0801881	0.0736571	0	0.0792353	0	0
OR2Z1	0.189346	0	0	0.0705148	0.24778	0	0	0	0	0.371484	0	0	0	0	0	0	0	0.238647	0.301612	0	0	0.318056	0	0	0.111646	0	0	0	0.169549	0	0.119251	0.317535	0.0970685	0	0	0	0.0870846	0	1.06188	0.165209	0.0790063	0.0949359	0	0	0.371354	0	0	0	0.0798356
OR51I2	0.319408	0	3.49749	0	0	0.384656	0.23322	0.08474	0.182236	0.208886	0.217667	0	0	0.116325	0.111903	0	0	0.268383	0.226129	0	0	0	0.378326	0	0	0	0.107452	0.0699826	0.0953377	0.318034	0.536438	0.238067	0	0.262171	0	0.29051	0	0.234533	0.0995161	0	0.0888505	0.42706	0.45969	0.113664	0	0	0.112313	0.221099	0.0897831
OR6N2	0.104795	0	0	0	0.091424	0.0946519	0	0.0834076	0	0.102801	0	0	0	0.114496	0	0	0	0	0	0	0	0.117354	0.0930944	0.0822415	0	0	0.105763	0.0688822	0	0	0	0	0	0	0	0	0	0	0	0	0	0.105086	0	0	0.411059	0.29997	0	0	0.265114
OR14A16	0.967498	0	0.235423	0	0.187567	0	0.117739	0.17112	0	0.527268	0	0	0	0	0.112986	0	0.192628	0	0	0	0	0	0.381987	0	0.253545	0	0.216985	0	0	0	0	0	0	0.44118	0	0.146661	0.296649	0.118401	0	0	0	0	2.78483	0	0.210833	0	0.453601	0	0
OR6N1	0	0	0	0	0.278653	0	0	0	0	0	0	0	0.101461	0.116325	0.111903	0	0	0	0.113064	0	0	0.119229	0.378326	0	0	0	0	0	0	0	0	0	0	0	0	0	0	0	0	0	0	0.106765	0	0.113664	0.313219	0	0	0.221099	0
OR2W5	0	0.16842	0	0.137896	0	0	0	0.44206	0	0	0.378498	0	0	0.101138	0	0.0614385	0	0	0.196607	0	0.0733299	0	0	0	0	0	0.186848	0.0608459	0.0828908	0	0	0	0	0	0.0671522	0.126291	0	0	0.173048	0	0	0	0	0	0	0	0	0	0
OR5K2	0	0.171597	0.722926	0.140497	0.411408	0.340747	0.309897	0	0.0807166	0.277562	0	0.0799579	0.179759	0.206093	0.495646	0.375586	0.338007	0.71324	0.200316	0.0585898	0	0.211237	0.33514	0	0.333674	0	0.380747	0.185982	0.422274	0.37564	0.118801	0.421782	0.386809	0.541903	0	0	0.43378	0	0.264469	0	0.0787082	0	0.305412	0.302067	0.647418	0.269973	0.0994926	0.39172	0.318137
OR52B2	0.092655	0.168576	0.30437	0.0690117	0.0808327	0.167373	0.10148	0.073745	0.0792953	0.0908914	0.0947122	0.0785499	0.26489	0.303696	0.292151	0.122991	0.249041	1.1678	0	0	0.146796	0.311277	0	0.218142	0.655597	0	0	0	0.248903	0.369025	0.233418	0.207177	0	0.152103	0.134429	0.379225	0	0.102051	0	1.21266	0.154644	0.0929122	0.400045	0.593496	0.181719	0	0.390962	0.384822	0.312535
OR11H7	0.106356	0	0.232918	0.0792166	0.185571	0.384246	0.349458	0.338599	0	0	0	0.540992	0.30406	0.116201	0.111784	0	0	0.268097	0.338833	0	0	0.119102	1.13377	0.0834664	0	0	0.214676	0	0	0.105899	0.4019	0.118907	0.109047	0.174595	0.0771536	0.290201	0.0978312	0	0.497051	0.278395	0.266268	0.533257	0.2296	0.340629	0.208591	0.202959	0.673163	0.110432	0.269063
OR10H5	0	0	0	0.0657806	0	0.0797684	0	0	0	0	0.451389	0	0	0	0	0	0	0.44525	0	0	0	0	0.0784559	0	0.10415	0	0	0	0	0	0.111244	0.0987387	0	0.289963	0	0	0	0.0972731	0	0	0	0.0885621	0	0	0	0	0	0.0917012	0
OR51B6	0.425878	0	2.68141	0	0.0928844	0.192328	0	0.08474	0	0.208886	0	0	0	0	0	0	0	0	0	0.0661397	0	0	0.472907	0	0	0	0.42981	0	0	0	0	0	0	0.0873904	0.0772358	0.726276	0	0.117266	0	0.0928972	0	0	0	0	0.104406	0	0	0.110549	0.179566
OR9A2	0.288944	0.350469	0	0.0717376	0.0840255	0.0869922	0	0	0	0.283445	0.0984532	0.0816526	0	0.420922	0	0.0639245	0.0862928	0.242786	0.102281	0	0	0.215715	0.0855607	0	0.113582	0.071043	0	0	0.0862448	0.191801	1.21319	0	0	0.0790555	0	0.394204	0	0.212164	0.810223	0.084037	0	0.193164	0.311885	0.102823	0.0944485	0.0918984	0.101601	0.600034	0.16244
OR51M1	0	0	2.6782	0	0	0.27614	0.223235	0	0	0.0999713	0	0.0863969	0	0.111345	0	0	0.182613	0.256892	0.108224	0.063308	0	0.114124	0.452661	0	0	0	0.102852	0	0	0.608836	0.128368	0.113937	0.10449	0.501893	0	0.278073	0	0	0	0	0	0.306582	0	0	0.0999363	0	0.107505	0.740714	0.429696
OR4F5	0	0	0	0	0	0	0	0	0	0	0	0	0	0	0.114463	0	0	0	0	0	0	0	0	0	0	0	0	0	0	0	0	0	0	0	0	0	0	0	0	0	0	0	0	0	0	0	0	0	0
OR56A5	0	0	0.11572	0	0	0	0	0	0	0	0	0	0.201421	0.115464	0.111075	0	0	0	0	0	0	0	1.0327	0	0	0	0	0	0	0	0	0	0	0	0	0.14418	0	0	0	0	0	0	0	0	0	0	0	0	0
OR52I1	0	0	0.312776	0.0709177	0	0	0.208566	0	0	0.186803	0.097328	0	0.0907355	0.104028	0.400293	0.126388	0.341226	0.240011	0	0.177443	0.15085	0.106625	0.253749	0.523056	0.673704	0	0	0	0.596814	0.474022	0.479729	0.2129	0.195246	0.39076	0.207213	0.259799	0.0875822	0.209739	0.0889959	0.664613	0	1.24122	0.102773	0.101648	0.186738	0.181696	0.20088	0.395451	0.0802918
OR4D1	0	0	0	0	0	0.0881815	0	0.0777059	0.0835543	0.191546	0.299398	0	0.0930393	0	0	0.129597	0	0	0.207358	0	0.23202	0	0	0	0	0	0.197066	0.0641735	0.0874239	0.0972116	0	0.109153	0	0	0.141649	0	0.179612	0	0	0.255558	0	0.195805	0	0.312687	0.19148	0	0.10299	0.202746	0.164661
OR2M5	0.212939	0	0.932665	0	0	0	0	0	0	0.208886	0.108833	0	0	0.116325	0	0	0	0	0	0.132279	0	0.119229	0.378326	0	0	0	0.107452	0	0	0	0	0	0	0	0	0	0	0	0	0	0	0	0	0	0.417625	0.101587	0	0	0
OR51B5	0.0721579	0.0656417	2.96296	0	0	0.228107	0.118546	0.0574312	0.0308768	0.106177	0.07376	0.0305866	0.0343819	0.118256	0.151681	0.0478914	0.129299	0.136419	0.191569	0.0224126	0.0571608	0.242416	0.224354	0.0283141	0.0425472	0	0.400533	0.0474295	0.0323068	0.143695	0.409007	0.201682	0.147967	0.355364	0	0.935221	0	0.119213	0.269782	0	0	0.144716	0.11683	0	0.247659	0	0.0761185	0.187307	0.0912736
OR51Q1	0	0	2.19742	0	0.0795789	0.57672	0	0.217803	0	0.0894816	0	0	0.0869272	0	0.0958731	0	0	0.114969	0.290605	0	0	0.408598	0.243099	0	0	0	0.0920601	0.119915	0	0.181651	0.114898	0	0.0935258	0.823591	0.132344	0.373343	0.167813	0	0	0	0	0.182942	0.19692	0	0.178901	0.0870352	0.0962246	0.189427	0.0769219
OR4D5	0.0913012	0	0	0	0	0	0	0	0	0	0	0	0	0	0	0	0	0.230147	0	0	0	0	0	0	0	0	0	0	0	0	0	0	0	0	0	0	0	0	0	0	0	0	0	0	0	0	0	0	0
OR52A5	0	0	0	0.0783003	0	0	0	0.0836707	0	0.103125	0	0	0	0	0	0	0	0.132498	0	0	0	0	0.280164	0	0	0	0	0	0	0	0	0	0	0	0	0	0	0	0	0	0.175459	0	0.113472	0	0.721622	0	0	0.109154	0
OR5AN1	0	0	0.105566	0	0	0	0.10559	0	0	0	0	0	0	0	0.101328	0	0	0	0.102379	0	0	0.107961	0	0	0	0	0	0.063369	0	0	0	0	0.098847	0.0791317	0	0.131528	0.0886801	0	0	0	0.0804539	0.290026	0	0	0	0	0	0	0
OR51V1	0.103494	0	0	0	0	0.0934761	0	0.329486	0	0.304571	0	0	0	0	0.217551	0.206067	0	0.260881	0	0.192873	0	0	0.735503	0	0	0	0	0	0	0.103048	0	0	0	0	0	0	0	0	0	0	0	0	0	0	0.101488	0	0	0.429838	0
OR2M7	0	0	0.233166	0	0	0	0	0	0	0.208886	0	0	0	0	0	0	0	0.134191	0	0	0	0	0.0945815	0	0	0	0.107452	0.0699826	0	0	0.402328	0	0	0	0	0	0	0.117266	0	0	0	0	0	0	0	0	0	0	0
OR2T12	0	0	0.682066	0	0	0	0	0	0	0	0	0	0	0.113426	0	0	0	0	0	0.0644914	0	0	0	0	0	0	0.314324	0	0	0.103369	0.130767	0.232133	0	0.255637	0.0753109	0	0	0	0	0	0	0.104104	0.224117	0.110831	0.101804	0	0.219028	0.215588	0
OR56B4	0.173567	0.23684	0	0.193916	0.0757105	0.235151	0.475247	0	0.0742705	0.170264	0.266131	0.220717	0.413508	0.0948172	0.0912126	0.0575986	0.311013	1.20318	0	0	0.274987	0	0.539656	0	0.102342	0.0640127	0.17517	0.0570431	0.23313	0	0.327939	0.0970245	0.0889794	0	0.314776	0	0.239483	0.0955843	0	0.378604	0.362112	0.348098	0.0936737	0.185296	0.170204	0	0	0.270328	0.29273
OR52E4	0	0	0	0	0	0	0	0	0	0	0	0	0	0	0	0	0	0	0	0	0	0	0.172451	0	0	0	0	0.0637996	0	0	0	0	0	0	0	0	0	0	0	0	0	0	0	0	0	0	0	0	0
OR6T1	0	0	0	0	0	0	0	0	0	0.0900568	0.0938424	0	0	0	0	0	0	0	0	0	0	0	0.0815537	0	0	0	0	0	0.0822058	0	0	0	0	0	0	0	0	0.101114	0	0	0	0.092059	0	0.0980077	0	0	0	0	0
OR5P3	0	0	0	0	0	0	0	0	0	0	0	0	0	0	0	0	0	0	0	0	0	0	0.0948846	0	0	0	0	0	0	0	0	0	0	0	0	0	0	0	0	0	0	0	0	0	0	0	0	0	0
OR52E8	0	0	0	0	0	0	0	0	0	0	0	0	0	0	0	0	0	0	0	0	0	0	0.083706	0	0	0	0	0	0	0	0	0	0	0	0	0	0	0	0	0	0	0	0	0	0	0	0	0	0
OR5P2	0	0	0	0	0.0815889	0	0	0	0	0	0	0	0	0.102179	0.0982946	0	0	0	0	0	0	0	0	0	0	0.275931	0	0	0	0	0	0	0	0	0	0	0	0	0	0	0	0	0	0	0	0	0	0	0
OR56A4	0	0.0752247	0	0	0	0	0	0	0	0.0811181	0	0	0	0	0	0	0	0	0.0878143	0	0	0	0.587673	0	0	0	0	0	0	0	0.312478	0	0	0	0	0	0.0760639	0	0	0.216453	0	0	0	0	0	0	0	0	0
OR2V1	0	0	0	0	0	0.381004	0	0	0	0.103451	0	0	0	0	0	0	0	0	0.223982	0	0	0	0.749469	0	0	0	0	0	0	0	0.132836	0.117903	0	0.692486	0	0	0	0	0	0	0	0	0	0	0	0	0	0	0
OR7A5	0	0	0	0	0	0.0469324	0	0	0	0	0.0531156	0	0.0990356	0	0	0	0.0931101	0	0	0.0322792	0	0	0.0923202	0.0407788	0	0	0	0.0683094	0.139587	0	0.130903	0.0580937	0	0.0426505	0.0376946	0	0.0477969	0	0	0.0453381	0.0433631	0.104212	0.392612	0	0.0509551	0	0.109628	0	0
OR6M1	0	0	0	0	0	0	0	0	0	0	0	0	0	0	0	0	0	0	0	0.0589793	0	0.106321	0	0	0	0	0	0	0	0	0	0	0.097345	0	0	0	0	0	0.0887423	0	0	0	0	0	0	0	0	0	0
OR2T4	0	0	0.41823	0	0	0	0	0	0	0	0	0	0	0	0	0	0	0	0	0	0	0	0	0	0	0	0.0963685	0	0	0	0	0.106755	0	0.313504	0	0	0	0	0	0	0	0	0	0	0	0	0	0	0
OR2M2	0	0	0.838863	0	0	0	0	0	0	0	0.195775	0	0	0.104626	0.100648	0.0635571	0	0	0	0	0	0.107237	0	0	0	0.0706347	0.193291	0	0	0	0	0.107062	0	0.0786011	0	0	0.0880855	0	0	0	0	0.0960271	0.206728	0.102232	0.0939057	0	0	0	0
OR52J3	0.106811	0	0	0	0	0	0	0	0	0.209555	0	0	0	0	0	0	0	0.134622	1.2477	0	0	0	0.0948846	0	0	0	0	0	0	0	0	0	0	0	0	0	0	0.117642	0	0	0	0	0	0	0	0	0	0	0
OR2A42	0	0	0	0	0.0934818	0	0	0.255855	0.0917038	0	0	0	0	0	0	0	0	0.135054	0	0.066565	0	0.359987	0	0.0840926	0.379094	0.0790382	0	0	0.0959508	0	0	0	0.329596	0.175905	0	0.730946	0	0	0	0	0.268266	0.107452	0	0.22879	0	0.102241	0.226071	0.11126	0.0903605
OR6V1	0.0972517	0.176939	0	0.0724354	0	0.351354	0.106515	0	0	0.190801	0	0	0	0.106254	0.102215	0.322731	0.261397	0.490295	0.309827	0	0	0	0.172786	0.152643	0	0.143468	0	0.127848	0.0870837	0.0968333	0.244998	0.108728	0	0	0	0.13268	0	0.214228	0.363602	0	0.162316	0.195043	0.419892	0	0	0	0	0.201957	0.16402
OR10G4	0	0	0	0	0	0	0	0	0	0	0	0	0	0	0	0	0	0	0	0	0	0	0	0	0	0	0	0	0	0	0.134539	0	0	0	0	0	0	0	0	0	0	0	0	0	0	0	0	0	0
[truncated: 102 more columns]

## Sheet: Table S3
Table S3. OR genes overexpressed in AML samples in comparison to GTEx healthy whole blood samples.
	AML x Whole Blood
gene.symbol	log2FC	FDR
OR2AK2	3.88149	1.05324e-227
OR2L5	3.84744	3.50279e-203
OR2L2	3.84239	3.82201e-208
OR2L13	3.84166	1.23583e-199
OR13D1	3.64095	1.19985e-255
OR2L3	3.40672	6.28257e-162
OR2G3	2.80511	1.88608e-107
OR52K2	2.46902	1.01439e-75
OR2G2	2.46628	1.5831e-87
OR10A5	2.41933	1.44372e-65
OR10A2	2.40034	4.30968e-66
OR9A4	2.19022	3.04727e-49
OR52B6	1.94031	4.3673e-79
OR10H1	1.88891	1.23949e-45
OR10A4	1.84761	9.77133e-43
OR5B21	1.74512	1.44952e-61
OR3A1	1.72731	5.43742e-33
OR13G1	1.71261	5.68116e-51
OR52H1	1.68427	2.17233e-51
OR11L1	1.62379	8.93827e-40
OR6A2	1.60682	4.47064e-33
OR2T8	1.59267	1.80498e-34
OR13C3	1.54456	6.74184e-41
OR2AE1	1.54163	2.69951e-49
OR2C1	1.52786	8.44317e-49
OR3A2	1.52159	6.74525e-24
OR13F1	1.50533	5.69338e-42
OR2D2	1.4716	8.84224e-29
OR2C3	1.46404	2.62336e-28
OR5C1	1.42465	3.10019e-48
OR1L8	1.39885	5.35146e-35
OR1K1	1.34505	2.27211e-46
OR2B2	1.29254	7.95019e-28
OR1Q1	1.28448	1.76834e-25
OR2D3	1.25428	8.1451e-23
OR56B1	1.21137	3.16994e-30
OR2AJ1	1.17199	5.9878e-30
OR7D2	1.13998	2.09411e-11
OR1N2	1.12553	2.28968e-20
OR1C1	1.12235	5.71967e-22
OR14K1	1.11546	3.66404e-23
OR1L4	1.09153	3.9907e-27
OR6F1	1.06852	2.51993e-20
OR1L6	1.05062	1.24045e-25
OR1J4	1.02076	1.73465e-16
OR52K1	1.00875	8.30935e-15
OR14A2	1.00726	5.38182e-17

## Sheet: Table S4
Table S4. OR genes overexpressed in AML samples in comparison to all 51 GTEx healthy tissues.
	Adipose-Subcutaneous		Adipose-Visceral		Adrenal Gland		Artery-Aorta		Artery-Coronary		Artery-Tibial		Bladder		Brain-Amygdala		Brain-AC cortex		Brain-Caudate		Brain-C Hemisphere		Brain-Cerebellum		Brain-Cortex		Brain-Frontal Cortex		Brain-Hippocampus		Brain-Hypothalamus		Brain-Nucleus accumbens		Brain-Putamen		Brain-Spinal cord		Brain-Substantia nigra		Breast		Cervix-Ectocervix		Cervix-Endocervix		Colon-Sigmoid		Colon-Transverse
gene.symbol	log2FC	FDR	log2FC	FDR	log2FC	FDR	log2FC	FDR	log2FC	FDR	log2FC	FDR	log2FC	FDR	log2FC	FDR	log2FC	FDR	log2FC	FDR	log2FC	FDR	log2FC	FDR	log2FC	FDR	log2FC	FDR	log2FC	FDR	log2FC	FDR	log2FC	FDR	log2FC	FDR	log2FC	FDR	log2FC	FDR	log2FC	FDR	log2FC	FDR	log2FC	FDR	log2FC	FDR	log2FC
OR5C1	2.2439	1.3573e-131	2.34064	4.96432e-127	2.63439	3.20493e-97	2.09069	1.66868e-90	2.32136	2.19566e-76	2.30224	3.9483e-137	1.82325	6.23982e-06	2.18667	1.58369e-42	2.28496	2.40015e-54	2.12122	3.11269e-62	2.3353	1.45418e-66	2.01477	1.97344e-62	2.42164	2.84796e-75	2.47867	8.01116e-67	2.11364	2.12476e-48	2.31864	8.13237e-59	2.38255	1.05982e-68	1.96629	1.40577e-44	2.34075	1.8244e-44	2.37023	2.74817e-42	2.36326	8.70015e-117	1.64667	0.00214476	1.57971	0.00594873	2.47719	2.27256e-107	2.37604
OR10A5	3.60685	1.65493e-155	3.56914	1.85321e-129	3.46022	2.05405e-75	3.39546	2.95449e-103	3.44714	1.13972e-68	3.40801	8.18556e-139	2.7865	5.97307e-05	3.1648	5.54519e-37	3.05497	1.90155e-41	2.9206	4.39318e-49	3.56969	5.11055e-60	3.50308	3.20005e-71	3.37598	3.89222e-62	3.41695	7.02968e-54	3.00808	5.04862e-41	3.28794	5.50733e-48	2.97515	5.90407e-48	2.69844	2.79977e-34	3.44536	4.05805e-39	3.21346	5.55674e-34	3.54716	2.17836e-109	2.30503	0.0135521	2.98456	0.00511679	3.60188	6.27019e-95	3.37114
OR2B2	3.10004	8.05398e-169	2.94599	1.54598e-130	3.04378	6.32572e-87	2.89639	1.43314e-111	3.02554	3.13482e-78	2.82545	8.83821e-140	2.69972	2.08045e-06	2.68616	1.91861e-40	2.84988	6.64544e-53	2.90091	3.91342e-68	3.18853	4.22696e-71	3.04655	6.51653e-81	2.92137	9.62861e-70	3.09622	1.75654e-64	2.64904	2.0067e-47	3.04006	3.03714e-59	2.91548	6.60173e-65	2.73483	4.73113e-49	2.58164	3.55758e-36	2.68185	1.00012e-36	3.13555	1.27291e-126	2.30755	0.00185278	3.13856	0.000653315	3.0404	3.52355e-101	2.89512
OR10A4	3.04789	4.83791e-125	2.90349	5.85374e-98	2.95078	9.94292e-63	2.76932	2.11241e-78	2.84939	3.43001e-54	2.91473	7.6295e-114	2.13819	0.000858696	2.58894	7.84804e-29	2.56232	2.73209e-34	2.36311	2.06854e-37	3.07785	3.45729e-51	2.95606	2.57458e-58	2.58152	9.30224e-44	2.69431	4.98887e-40	2.43598	3.04929e-31	2.61183	1.93473e-35	2.29013	1.04626e-33	2.31089	6.08767e-29	2.87599	1.90773e-31	2.66548	1.80878e-27	3.08424	2.59068e-94	2.4695	0.00678176	2.36754	0.0168227	3.03305	1.07166e-76	2.87171
OR10A2	3.5144	2.07626e-149	3.514	4.95952e-127	3.33952	6.29708e-72	3.3714	1.209e-102	3.39213	1.11972e-67	3.37779	2.90056e-137	2.58549	0.000140397	2.81257	2.4304e-31	2.80176	3.44407e-37	2.27027	2.6166e-32	3.50181	5.78702e-59	3.36163	1.99617e-67	2.89176	1.66742e-48	2.71414	1.18092e-36	2.69335	6.85608e-35	2.69846	3.33186e-35	2.21213	4.47415e-28	2.16279	2.69844e-24	3.11843	1.16634e-33	3.037	1.14674e-31	3.61928	1.15116e-115	2.90396	0.00256504	2.86334	0.00654651	3.40473	6.69333e-86	3.24538
OR1L6	1.97657	3.12588e-108	2.04925	2.03689e-89	2.14402	4.96105e-63	1.89307	1.56224e-68	2.16241	2.67751e-58	1.89554	1.07119e-85	1.18964	0.00242997	1.90203	1.50383e-29	1.86007	7.03336e-35	1.87619	5.54112e-44	1.90372	2.28493e-42	2.02114	6.05177e-55	2.13856	2.12858e-53	2.1376	6.36443e-47	1.82407	1.28828e-33	2.01686	1.93982e-40	2.14191	9.89468e-50	1.6347	6.42489e-27	2.00729	1.48615e-30	1.78216	3.24772e-25	1.98932	1.382e-78	1.65325	0.00589057	1.42548	0.0213437	2.14553	5.69051e-73	2.0029
OR2G3	3.99379	2.4798e-236	3.86865	3.62917e-189	3.94464	2.71442e-119	3.81061	1.28874e-159	3.91738	2.73895e-108	3.78892	1.34781e-211	3.06734	2.38038e-07	3.71004	2.45284e-60	3.68894	8.70217e-72	3.83441	1.68006e-96	3.89552	3.42258e-90	3.85129	6.28989e-108	3.87908	1.52124e-98	3.97917	4.46043e-87	3.70529	2.88842e-72	3.94134	1.68531e-80	3.94174	3.34942e-94	3.68288	5.09e-72	3.68204	2.68103e-56	3.58091	9.74968e-52	4.0279	2.36684e-174	3.54592	4.05325e-05	3.51841	0.000180173	3.98121	2.7372e-143	3.91882
OR2G2	3.59816	6.68364e-202	3.60691	3.34321e-171	3.5974	9.11511e-105	3.41048	4.15506e-135	3.54644	7.60579e-94	3.48915	9.39205e-188	3.07271	3.5513e-07	3.367	1.96535e-52	3.36173	6.27933e-63	3.49146	2.41243e-84	3.17801	3.71181e-68	2.95726	1.11456e-73	3.54583	3.50812e-86	3.68423	8.56028e-78	3.38975	2.29955e-63	3.61727	1.51959e-71	3.56067	1.5409e-81	3.3774	2.58429e-63	3.39989	4.23262e-50	3.27493	2.57796e-45	3.73708	4.03198e-157	3.21799	0.000145789	3.25011	0.000459538	3.57787	1.29831e-122	3.49165
OR13D1	4.65902	0	4.76895	0	4.4279	1.19365e-235	4.44367	0	4.74086	3.51332e-227	4.57892	0	4.20444	9.33874e-18	4.208	6.91531e-123	4.49378	1.55863e-156	4.32302	2.80947e-192	4.6609	2.3518e-192	4.6394	1.79826e-227	4.36058	1.48068e-197	4.67606	1.52489e-179	4.20933	6.13441e-147	4.34489	4.00032e-156	4.34156	1.93509e-182	4.33522	4.73079e-150	4.32993	9.76806e-120	4.21058	6.5633e-112	4.74131	0	3.76927	1.27388e-09	3.63172	3.94611e-08	4.66002	5.85217e-285	4.62467
OR52H1	4.45415	0	4.40065	0	4.43304	5.15848e-253	4.01753	1.41426e-291	4.30889	4.63238e-224	4.3123	0	4.5492	6.64665e-20	4.61351	1.98082e-141	4.78117	9.6575e-180	4.62526	1.14399e-219	5.03693	7.30268e-218	4.79578	1.80128e-252	4.71159	2.79516e-226	4.86732	3.81994e-199	4.52248	6.75571e-167	4.73961	5.92407e-185	4.795	3.34687e-214	4.60747	7.89526e-171	4.57896	2.23082e-133	4.6053	1.14238e-128	4.27862	0	4.02509	6.81228e-11	3.93348	2.55867e-09	4.41632	9.26533e-294	4.58399
OR52K2	5.63784	0	5.52051	1.65918e-306	5.56135	1.11413e-190	5.49201	1.07168e-263	5.64703	2.2936e-179	5.58615	0	5.28891	3.93199e-14	5.20794	2.11002e-98	5.32723	9.02325e-120	5.45368	2.89872e-158	5.81724	1.42486e-153	5.80351	1.87674e-186	5.62197	1.07491e-165	5.76815	2.87484e-144	5.40381	1.0026e-122	5.48667	1.28764e-128	5.59342	2.39657e-153	5.33607	1.4546e-122	5.0579	2.43398e-89	5.36522	1.95775e-92	5.73072	3.92177e-279	5.37372	2.68476e-08	5.57756	2.25296e-07	5.72466	7.30507e-233	5.71117
OR13F1	2.6369	1.386e-136	2.56623	2.27476e-111	2.29	2.38587e-60	2.42421	3.9482e-88	2.63416	1.54617e-66	2.49309	5.62681e-121	2.03375	6.31668e-05	2.2604	5.85254e-33	2.06845	3.52215e-34	2.23605	1.88058e-48	2.63431	3.30852e-57	2.542	6.08765e-65	2.22158	1.64525e-49	2.28842	1.08119e-44	2.18813	1.02106e-37	2.15458	2.37511e-38	2.28553	6.26725e-48	2.23608	1.64794e-38	2.35905	3.37755e-33	2.12199	1.79813e-27	2.57871	1.47357e-97	2.22386	0.00218042	1.50167	0.0345611	2.65809	5.08912e-86	2.6079
OR2AK2	4.94706	0	5.02178	0	5.08001	4.34594e-221	4.97864	9.46779e-300	5.05219	2.33219e-201	5.01807	0	4.10973	2.17598e-14	4.19142	4.78165e-101	4.05789	2.13166e-116	4.04744	1.27309e-143	4.32082	5.14438e-138	4.19674	1.90791e-156	3.89611	7.77586e-138	3.93055	6.6176e-119	4.09725	7.70728e-115	3.90978	7.65667e-110	3.78269	1.09524e-124	3.9593	3.59012e-112	3.96185	1.7281e-87	4.16985	2.69772e-89	4.57302	4.4369e-263	3.63892	2.48729e-07	4.85309	3.58576e-08	5.05879	8.38664e-258	4.88154
OR52B6	4.01903	0	4.00002	0	3.79818	6.24107e-225	3.31168	9.95979e-226	3.76599	1.52603e-199	3.84956	0	3.67663	2.20667e-18	4.21999	1.30309e-136	4.39175	2.94233e-172	4.29603	1.95168e-212	4.80737	1.38762e-219	4.66264	7.5971e-256	4.426	6.2427e-227	4.61552	3.516e-199	4.38456	1.34067e-168	4.56246	1.58415e-186	4.43758	3.7185e-209	4.26273	1.02915e-166	4.45211	2.47239e-136	4.37448	2.18189e-126	3.89603	1.00999e-301	3.40836	5.47972e-10	3.28738	2.23782e-08	3.71221	1.00107e-243	4.09339
OR52K1	4.11383	6.93983e-225	3.8421	4.79309e-170	3.93846	2.50349e-110	3.96913	2.57163e-157	3.92456	5.35197e-100	3.95381	4.13522e-207	3.71943	1.87162e-08	3.69823	1.31157e-56	3.9243	3.2453e-73	3.85096	4.07762e-90	4.15149	1.70754e-91	4.14294	4.09311e-110	3.95605	3.24884e-94	4.1853	9.42422e-87	3.61164	4.40607e-65	4.0536	1.14655e-78	3.89636	1.06929e-86	3.69395	4.91077e-68	3.46175	2.37326e-48	3.54982	3.02722e-48	4.10859	1.4972e-165	3.60923	6.08657e-05	4.23002	6.44565e-05	4.03462	3.17287e-132	4.00948
OR2L5	5.04621	0	4.98384	0	5.04561	9.18185e-198	4.89643	6.87297e-265	4.979	4.44734e-178	5.00591	0	4.22669	4.71071e-13	4.00123	4.33147e-83	3.81581	2.44846e-94	3.72044	2.72438e-109	3.67508	3.79018e-95	3.5855	8.80119e-110	3.64718	8.39797e-107	3.58731	2.0852e-92	3.73148	3.97856e-89	3.84157	9.86254e-97	3.79759	9.31631e-110	3.81839	1.06366e-93	3.8477	2.42026e-75	3.76464	8.21385e-69	4.8545	1.35139e-264	4.45462	5.75005e-08	4.54838	5.02326e-07	4.99371	1.21291e-229	4.91263
OR2L3	4.06224	2.89415e-252	4.22498	8.60243e-232	4.30441	1.3951e-149	4.28492	1.65852e-206	4.27814	1.01378e-135	4.42871	1.19571e-291	2.9229	1.06345e-07	2.90012	4.18033e-47	2.92684	5.1889e-58	2.8955	8.74049e-70	1.77089	7.51026e-23	1.81889	2.15291e-27	2.74854	2.00313e-66	2.76545	1.33978e-56	2.41671	1.05059e-40	2.33635	2.91655e-40	2.92603	1.01895e-68	2.86231	1.14906e-54	1.46814	5.91348e-14	2.46343	1.18118e-31	3.14416	7.82993e-102	2.59939	0.000470784	3.26931	0.000111206	4.14464	5.32076e-164	4.23838
OR2AE1	1.56789	5.85043e-44	1.99169	1.76969e-70	1.73491	9.69678e-43	1.51169	2.40468e-36	1.75611	3.91957e-39	1.48091	1.18456e-36	2.06894	2.86716e-06	2.55666	3.70941e-49	2.08457	1.0896e-45	2.14246	6.7925e-55	2.22095	5.41961e-54	1.97834	1.91719e-48	2.10839	4.01096e-52	2.14439	3.3683e-48	2.16373	1.88022e-45	2.31432	8.29526e-52	2.13896	1.18413e-50	2.22639	2.21723e-47	2.05975	2.13676e-33	2.29058	6.71074e-38	1.53555	2.24686e-34	1.32124	0.0188242	2.00093	0.00232595	2.00847	1.57788e-58	2.16822
OR9A4	4.52298	1.58587e-261	4.30499	7.03275e-204	4.26929	1.36735e-125	4.11771	3.84367e-165	4.1308	3.84974e-108	4.07742	5.31371e-208	3.89935	3.10053e-09	3.98646	1.40452e-64	4.18067	3.07727e-82	4.07865	1.14315e-99	4.46588	2.03663e-102	4.44984	1.48305e-123	4.3095	9.31475e-108	4.53723	5.82183e-99	4.20112	2.69662e-82	4.08748	5.82113e-81	4.12664	3.24055e-94	4.01256	9.94309e-78	3.68908	2.60335e-51	4.02504	1.23171e-58	4.45677	4.67813e-186	3.95172	1.39388e-05	4.22491	3.49277e-05	4.28983	1.51444e-144	4.46371
[truncated: 53 more columns]

## Sheet: Table S5
Table S5. OR genes expression on independent AML cohort detected by RT-PCR.
Sample	OR52H1	OR52B6	OR13D1	OR2AK2	OR2L5	OR5C1	OR2G2	OR13F1	OR1L6
P1-AML	-	+	+	-	-	-	-	-	-
P2-AML	-	+	-	-	-	-	-	-	-
P3-AML	-	+	+	+	+	+	-	-	-
P4-AML	-	+	+	-	+	-	-	-	-
P5-AML	-	-	-	-	+	+	+	-	-
P6-AML	-	+	+	+	+	+	+	-	-
P7-AML	-	+	-	-	-	-	-	+	-
P8-AML	+	+	+	+	+	+	+	+	-
P9-AML	+	+	+	+	+	+	+	-	+
P10-AML	+	+	+	+	+	+	+	-	+
P11-AML	-	-	-	+	+	+	+	+	-
P12-AML	+	+	+	+	+	+	+	-	+
P13-AML	-	+	+	+	+	+	+	-	+
D1-BM	-	+	-	-	+	+	-	+	-
D2-BM	-	+	-	-	+	+	-	-	-
D3-BM	-	+	-	-	+	+	-	+	-
D4-BM	-	+	-	-	-	+	-	-	-
D5-BM	-	-	-	-	-	-	-	-	-
D6-WB	+	+	-	+	+	+	+	-	-
D7-WB	+	+	+	+	+	+	+	-	-
D8-WB	+	+	+	+	+	+	-	-	-
D9-WB	-	+	-	-	+	+	-	-	-
D10-WB	-	+	-	-	-	-	-	-	-
D11-WB	+	+	-	+	+	+	-	+	-
D12-WB	+	+	+	+	+	+	-	+	-
D13-WB	-	-	-	-	-	-	-	-	-
D14-WB	-	+	-	-	+	-	-	-	-

## Sheet: Table S6
Table S6. OR genes expression in 4 AML, 2 ALL and 2 CML cell lines detected by RT-PCR.
Gene Symbol	RT-PCR (+/-)
	KASUMI-1 (LMA)	MOLM-13 (LMA)	OCI-AML-3 (LMA)	NB-4 (LMA)	KCL-22 (LMC)	K562 (LMC)	REH (LLA)	MOLT-4 (LLA)
OR10A2	-	+	-	-	-	+	-	-
OR10A4	-	+	-	-	-	+	+	-
OR10A5	-	+	-	-	-	+	-	-
OR13D1	+	+	-	+	-	+	+	+
OR13F1	-	-	-	-	-	-	-	-
OR1L6	+	+	-	+	-	-	+	+
OR2AE1	+	+	+	+	+	+	+	+
OR2AK2	+	-	-	-	+	+	+	-
OR2B2	+	+	+	+	-	+	+	+
OR2G2	-	+	-	-	+	-	-	-
OR2G3	-	-	-	-	+	-	-	-
OR2L3	+	-	-	-	+	-	-	-
OR2L5	+	-	-	-	+	+	+	-
OR52B6	-	+	-	+	-	-	-	+
OR52H1	-	-	-	+	-	-	-	+
OR52K1	-	+	-	-	-	-	-	-
OR52K2	+	+	+	+	-	-	-	-
OR5C1	+	+	+	+	-	-	+	+
OR9A4	+	+	-	+	-	-	-	-
Expressed ORs	10	13	4	9	6	9	9	7

## Sheet: Table S7
Table S7. Protein-coding genes showing a positive expression correlation with at least one of the 19 OR genes.
coding.gene	total.correlated.ORs	OR10A2	OR10A4	OR10A5	OR13D1	OR13F1	OR1L6	OR2AE1	OR2AK2	OR2B2	OR2G2	OR2G3	OR2L3	OR2L5	OR52B6	OR52H1	OR52K1	OR52K2	OR5C1	OR9A4
STXBP4	8	----	----	----	0.581416	----	----	----	0.531471	----	0.515235	0.520872	0.536089	0.579358	0.579474	0.629303	----	----	----	----
TTC5	7	----	----	----	0.537975	----	----	----	0.551905	----	0.55276	0.551623	0.577801	0.590016	----	0.554601	----	----	----	----
PRKCQ	7	----	----	----	----	----	----	----	0.53404	----	0.588053	0.577433	0.545792	0.557335	0.565664	0.579219	----	----	----	----
TESPA1	7	----	----	----	----	----	----	----	0.502796	----	0.536902	0.526155	0.503885	0.503358	0.550202	0.566379	----	----	----	----
ARID1B	6	----	----	----	0.525935	----	----	----	0.521658	----	----	----	0.504054	0.540838	0.58603	0.585762	----	----	----	----
BICD1	6	----	----	----	0.552683	----	----	----	0.528619	----	----	----	0.571914	0.603669	0.528519	0.593946	----	----	----	----
CCDC171	6	----	----	----	0.661086	----	----	----	0.612354	----	----	----	0.583546	0.633196	0.651673	0.68085	----	----	----	----
FBXL4	6	----	----	----	0.539227	----	----	----	0.587151	----	----	----	0.562907	0.614695	0.518079	0.561788	----	----	----	----
FSIP2	6	----	----	----	0.64385	----	----	----	0.558277	----	----	----	0.517787	0.58171	0.616748	0.654089	----	----	----	----
KIAA1328	6	----	----	----	0.566557	----	----	----	0.519378	----	----	----	0.531247	0.557522	0.561021	0.592328	----	----	----	----
LRBA	6	----	----	----	0.501552	----	----	----	0.643176	----	----	----	0.636788	0.66059	0.562579	0.610439	----	----	----	----
MAB21L2	6	----	----	----	0.511349	----	----	----	0.708439	----	----	----	0.617429	0.67128	0.603102	0.64725	----	----	----	----
MBD5	6	----	----	----	0.60644	----	----	----	0.67235	----	----	----	0.599568	0.643314	0.638662	0.67565	----	----	----	----
NHLRC2	6	----	----	----	0.565861	----	----	----	0.546268	----	----	----	0.568118	0.577603	0.521802	0.558982	----	----	----	----
PARP11	6	----	----	----	0.531816	----	----	----	0.508547	----	----	----	0.517773	0.535345	0.508233	0.509798	----	----	----	----
RBM12B	6	----	----	----	0.554936	----	----	----	0.557521	----	----	----	0.589321	0.592542	0.531415	0.570164	----	----	----	----
RFX7	6	----	----	----	0.586463	----	----	----	0.543047	----	----	----	0.540549	0.586074	0.567727	0.590237	----	----	----	----
SCAI	6	----	----	----	0.57888	----	----	----	0.519448	----	----	----	0.562722	0.592727	0.564692	0.603186	----	----	----	----
SLC10A5	6	----	----	----	0.503951	----	----	----	0.510273	----	----	----	0.507648	0.544655	0.524012	0.508763	----	----	----	----
STX17	6	----	----	----	0.588517	----	----	----	0.542172	----	----	----	0.577775	0.588682	0.592747	0.611973	----	----	----	----
TAMM41	6	----	----	----	0.63601	----	----	----	0.557758	----	----	----	0.524485	0.561076	0.561826	0.574399	----	----	----	----
WDR33	6	----	----	----	0.561921	----	----	----	0.588556	----	----	----	0.568666	0.605108	0.570802	0.596804	----	----	----	----
YLPM1	6	----	----	----	0.563374	----	----	----	0.511176	----	----	----	0.50668	0.530627	0.546999	0.619923	----	----	----	----
ZBTB25	6	----	----	----	0.534364	----	----	----	0.564412	----	----	----	0.571857	0.559619	0.503472	0.535789	----	----	----	----
ZFP14	6	----	----	----	0.602923	----	----	----	0.514038	----	----	----	0.530445	0.552113	0.574765	0.59595	----	----	----	----
ZKSCAN8	6	----	----	----	0.512749	----	----	----	0.510252	----	----	----	0.540394	0.545661	0.574991	0.58955	----	----	----	----
ZNF460	6	----	----	----	0.557932	----	----	----	0.596633	----	----	----	0.557899	0.601961	0.575856	0.647142	----	----	----	----
ZNF506	6	----	----	----	0.582968	----	----	----	0.543623	----	----	----	0.502689	0.569731	0.585992	0.594116	----	----	----	----
ZNF551	6	----	----	----	0.519605	----	----	----	0.548412	----	----	----	0.508495	0.572411	0.652046	0.688892	----	----	----	----
ZNF559-ZNF177	6	----	----	----	0.503686	----	----	----	0.535249	----	----	----	0.519942	0.574259	0.674427	0.690687	----	----	----	----
ZNF573	6	----	----	----	0.571463	----	----	----	0.591034	----	----	----	0.552262	0.626746	0.59291	0.623311	----	----	----	----
ZNF620	6	----	----	----	0.513329	----	----	----	0.517524	----	----	----	0.562579	0.558041	0.559439	0.537905	----	----	----	----
ZNF772	6	----	----	----	0.525875	----	----	----	0.559124	----	----	----	0.573667	0.617528	0.634064	0.619983	----	----	----	----
ZNF776	6	----	----	----	0.544204	----	----	----	0.543884	----	----	----	0.54933	0.57636	0.642325	0.658979	----	----	----	----
ZNF780B	6	----	----	----	0.528563	----	----	----	0.503486	----	----	----	0.508697	0.544646	0.606002	0.606654	----	----	----	----
ZNF790	6	----	----	----	0.565224	----	----	----	0.574159	----	----	----	0.54335	0.603585	0.628919	0.634228	----	----	----	----
ZNF91	6	----	----	----	0.541999	----	----	----	0.628361	----	----	----	0.528558	0.5993	0.581555	0.60351	----	----	----	----
GAB1	5	----	----	----	0.536883	----	----	----	0.51402	----	----	----	0.515433	0.544097	----	0.527989	----	----	----	----
LRIG2	5	----	----	----	0.508591	----	----	----	0.527953	----	----	----	----	0.552246	0.567236	0.528093	----	----	----	----
PDE5A	5	----	----	----	0.532418	----	----	----	0.55095	----	----	----	----	0.527818	0.521171	0.575186	----	----	----	----
RC3H2	5	----	----	----	0.526538	----	----	----	----	----	----	----	0.552696	0.54897	0.554001	0.530701	----	----	----	----
SOS1	5	----	----	----	0.539849	----	----	----	----	----	----	----	0.501576	0.509784	0.515619	0.513907	----	----	----	----
TAS2R3	5	----	----	----	0.574962	----	----	----	0.500295	----	----	----	----	0.526954	0.584038	0.648357	----	----	----	----
WDPCP	5	----	----	----	0.59011	----	----	----	0.523917	----	----	----	----	0.549495	0.603022	0.622673	----	----	----	----
ZBTB20	5	----	----	----	0.552592	----	----	----	0.583393	----	----	----	----	0.582205	0.638853	0.654601	----	----	----	----
ZNF397	5	----	----	----	0.509971	----	----	----	----	----	----	----	0.503626	0.516085	0.548689	0.521833	----	----	----	----
ZNF550	5	----	----	----	0.551947	----	----	----	----	----	----	----	0.509731	0.523388	0.554712	0.580362	----	----	----	----
ZNF66	5	----	----	----	0.607688	----	----	----	0.534706	----	----	----	----	0.53449	0.594953	0.666884	----	----	----	----
ZNF717	5	----	----	----	0.576745	----	----	----	----	----	----	----	0.511911	0.51976	0.555354	0.539902	----	----	----	----
ZNF749	5	----	----	----	0.520361	----	----	----	----	----	0.529397	----	----	0.512838	0.585929	0.619585	----	----	----	----
ACTR3C	5	----	----	----	----	----	----	----	0.532419	----	----	----	0.5024	0.541754	0.507961	0.598487	----	----	----	----
BBX	5	----	----	----	----	----	----	----	0.504835	----	----	----	0.5289	0.55919	0.503625	0.50443	----	----	----	----
C20orf203	5	----	----	----	----	----	----	----	0.510684	----	----	----	0.527283	0.540399	0.627937	0.606291	----	----	----	----
C2orf88	5	----	----	----	----	----	----	----	0.585398	----	----	----	0.61873	0.634588	0.647334	0.652314	----	----	----	----
CDK17	5	----	----	----	----	----	----	----	0.639739	----	----	----	0.555623	0.607151	0.57909	0.55083	----	----	----	----
ELK4	5	----	----	----	----	----	----	----	0.516157	----	----	----	0.521237	0.541569	0.517522	0.537612	----	----	----	----
EMSY	5	----	----	----	----	----	----	----	0.546178	----	----	----	0.543813	0.536026	0.557508	0.578689	----	----	----	----
GPLD1	5	----	----	----	----	----	----	----	0.529111	----	----	----	0.535281	0.568957	0.559571	0.555375	----	----	----	----
HMBOX1	5	----	----	----	----	----	----	----	0.533032	----	----	----	0.527699	0.515415	0.560401	0.633541	----	----	----	----
KLHL6	5	----	----	----	----	----	----	----	0.536999	----	----	----	0.566167	0.572855	0.534615	0.556455	----	----	----	----
KMT2A	5	----	----	----	----	----	----	----	0.536086	----	----	----	0.531369	0.555014	0.595915	0.601335	----	----	----	----
MAST4	5	----	----	----	----	----	----	----	0.588521	----	----	----	0.580928	0.603533	0.530352	0.60686	----	----	----	----
MYLK	5	----	----	----	----	----	----	----	0.562234	----	----	----	0.606632	0.615598	0.563398	0.583879	----	----	----	----
ORC4	5	----	----	----	----	----	----	----	0.503071	----	----	----	0.511217	0.543159	0.540864	0.523663	----	----	----	----
PTPN4	5	----	----	----	----	----	----	----	0.540196	----	----	----	0.533198	0.555323	0.523569	0.556912	----	----	----	----
RAB39B	5	----	----	----	----	----	----	----	0.527214	----	----	----	0.572833	0.5805	0.553712	0.579805	----	----	----	----
SEC14L2	5	----	----	----	----	----	----	----	0.502785	----	----	----	0.512972	0.517185	0.536762	0.5194	----	----	----	----
TNRC6B	5	----	----	----	----	----	----	----	0.512044	----	----	----	0.516819	0.537358	0.601258	0.622307	----	----	----	----
TSC22D1	5	----	----	----	----	----	----	----	0.550936	----	----	----	0.553774	0.549784	0.515054	0.522848	----	----	----	----
VN1R1	5	----	----	----	----	----	----	----	0.526664	----	----	----	0.550545	0.592612	0.613276	0.578142	----	----	----	----
ZBTB46	5	----	----	----	----	----	----	----	0.51347	----	----	----	0.518435	0.504557	0.502761	0.513081	----	----	----	----
ZNF154	5	----	----	----	----	----	----	----	0.547945	----	----	----	0.527402	0.564677	0.642011	0.659672	----	----	----	----
ZNF256	5	----	----	----	----	----	----	----	0.559194	----	----	----	0.56315	0.546081	0.532112	0.542994	----	----	----	----
ZNF292	5	----	----	----	----	----	----	----	0.531833	----	----	----	0.502856	0.549983	0.61596	0.663768	----	----	----	----
ZNF417	5	----	----	----	----	----	----	----	0.502799	----	----	----	0.508591	0.54068	0.667762	0.672224	----	----	----	----
ZNF484	5	----	----	----	----	----	----	----	0.567264	----	----	----	0.558195	0.584299	0.569871	0.605378	----	----	----	----
ZNF571	5	----	----	----	----	----	----	----	0.533719	----	----	----	0.523577	0.589042	0.679247	0.661105	----	----	----	----
ZNF606	5	----	----	----	----	----	----	----	0.587907	----	----	----	0.598288	0.620256	0.656267	0.64153	----	----	----	----
ZNF773	5	----	----	----	----	----	----	----	0.534064	----	----	----	0.541995	0.588925	0.609258	0.608853	----	----	----	----
ZNF792	5	----	----	----	----	----	----	----	0.574926	----	----	----	0.556833	0.568083	0.536438	0.573036	----	----	----	----
ZNF793	5	----	----	----	----	----	----	----	0.507648	----	----	----	0.506162	0.568631	0.5652	0.599599	----	----	----	----
ZNF844	5	----	----	----	----	----	----	----	0.544874	----	----	----	0.509288	0.590799	0.532551	0.516699	----	----	----	----
ZNF880	5	----	----	----	----	----	----	----	0.513668	----	----	----	0.508493	0.547005	0.601764	0.581251	----	----	----	----
AKAP5	4	----	----	----	0.513531	----	----	----	----	----	----	----	----	0.505687	0.546466	0.571129	----	----	----	----
ALG10B	4	----	----	----	0.52442	----	----	----	----	----	----	----	0.547493	0.544229	----	0.511819	----	----	----	----
ATXN2	4	----	----	----	0.519279	----	----	----	----	----	----	----	----	0.508802	0.527487	0.531875	----	----	----	----
B4GALT6	4	----	----	----	0.597266	----	----	----	----	----	----	----	0.514975	0.550617	----	0.526466	----	----	----	----
C16orf52	4	----	----	----	0.507155	----	----	----	0.501855	----	----	----	0.527197	0.543917	----	----	----	----	----	----
C3orf49	4	----	----	----	0.550658	----	----	----	----	----	----	----	----	0.504864	0.526643	0.53961	----	----	----	----
C6orf163	4	----	----	----	0.53983	----	----	----	----	----	----	----	----	0.501726	0.626501	0.630132	----	----	----	----
CHD9	4	----	----	----	0.582663	----	----	----	----	----	----	----	----	0.522734	0.575943	0.604319	----	----	----	----
CKMT2	4	----	----	----	0.579007	----	----	----	----	----	----	----	----	0.513755	0.623085	0.61917	----	----	----	----
EFCAB13	4	----	----	----	0.610222	----	----	----	----	----	----	----	----	0.53584	0.627316	0.653576	----	----	----	----
EYS	4	----	----	----	0.541513	----	----	----	0.53175	----	----	----	----	0.501461	----	0.527769	----	----	----	----
GLS	4	----	----	----	0.558857	----	----	----	----	----	----	----	----	0.538678	0.511868	0.535539	----	----	----	----
GPATCH2L	4	----	----	----	0.509753	----	----	----	----	----	----	----	----	0.509613	0.609955	0.588104	----	----	----	----
HDAC8	4	----	----	----	0.520265	----	----	----	----	----	----	----	----	0.519342	0.53961	0.587839	----	----	----	----
HIBCH	4	----	----	----	0.524586	----	----	----	----	----	----	----	----	0.526178	0.541279	0.593364	----	----	----	----
LRCH3	4	----	----	----	0.549023	----	----	----	----	----	----	----	----	0.515171	0.539376	0.509289	----	----	----	----
NF1	4	----	----	----	0.576724	----	----	----	----	----	----	----	----	0.50894	0.540708	0.567226	----	----	----	----
NR2C2	4	----	----	----	0.543481	----	----	----	----	----	----	----	----	0.502271	0.570662	0.562761	----	----	----	----
PIRT	4	----	----	----	0.51543	----	----	----	----	----	----	----	----	----	0.564856	0.537254	----	----	0.514694	----
RAG1	4	----	----	----	0.507995	----	----	----	----	----	----	----	0.514396	0.530603	----	0.515176	----	----	----	----
RFX3	4	----	----	----	0.588727	----	----	----	0.508136	----	----	----	----	0.507791	----	0.529076	----	----	----	----
RP11-258C19.5	4	----	----	----	0.535271	----	----	----	----	----	----	----	----	0.51813	0.609833	0.639965	----	----	----	----
SPIN2A	4	----	----	----	0.573578	----	----	----	0.502085	----	----	----	----	----	0.54351	0.582422	----	----	----	----
TAS2R31	4	----	----	----	0.551632	----	----	----	0.531596	----	----	----	----	----	0.511021	0.563426	----	----	----	----
TBC1D32	4	----	----	----	0.55584	----	----	----	----	----	----	----	----	0.536035	0.610199	0.632781	----	----	----	----
TEX10	4	----	----	----	0.551649	----	----	----	----	----	----	----	----	0.506726	0.500948	0.550143	----	----	----	----
VEPH1	4	----	----	----	0.50021	----	----	----	0.501548	----	----	----	----	----	0.51703	0.565155	----	----	----	----
ZNF141	4	----	----	----	0.610654	----	----	----	----	----	----	----	----	0.514884	0.527403	0.575863	----	----	----	----
ZNF248	4	----	----	----	0.551567	----	----	----	----	----	0.537353	0.510496	----	----	0.522349	----	----	----	----	----
ZNF345	4	----	----	----	0.523374	----	----	----	----	----	----	----	----	0.524385	0.573377	0.568857	----	----	----	----
ZNF493	4	----	----	----	0.51446	----	----	----	----	----	----	----	----	0.523041	0.577888	0.600244	----	----	----	----
ZNF619	4	----	----	----	0.580577	----	----	----	0.565009	----	----	----	0.565973	0.567703	----	----	----	----	----	----
ZNF638	4	----	----	----	0.509207	----	----	----	----	----	----	----	----	0.515316	0.560972	0.566581	----	----	----	----
ZNF678	4	----	----	----	0.548368	----	----	----	----	----	----	----	----	0.541414	0.561844	0.598261	----	----	----	----
ZNF737	4	----	----	----	0.526442	----	----	----	----	----	----	----	----	0.545652	0.626392	0.630509	----	----	----	----
ZNF808	4	----	----	----	0.514246	----	----	----	----	----	----	----	----	0.503288	0.543771	0.540471	----	----	----	----
ZNF852	4	----	----	----	0.601433	----	----	----	----	----	----	----	----	0.514878	0.502691	0.538076	----	----	----	----
ZSCAN30	4	----	----	----	0.57529	----	----	----	----	----	----	----	----	0.531785	0.616309	0.594552	----	----	----	----
AMN1	4	----	----	----	----	----	----	----	0.530547	----	----	----	0.536381	0.546163	0.501506	----	----	----	----	----
BRWD1	4	----	----	----	----	----	----	----	0.502472	----	----	----	----	0.529759	0.581729	0.640798	----	----	----	----
C19orf18	4	----	----	----	----	----	----	----	0.516527	----	----	----	----	0.539825	0.643677	0.619076	----	----	----	----
RSF1	4	----	----	----	----	----	----	----	0.505494	----	----	----	----	0.537637	0.560464	0.558372	----	----	----	----
SCAF8	4	----	----	----	----	----	----	----	0.535595	----	----	----	----	0.520377	0.564643	0.56549	----	----	----	----
TFPI	4	----	----	----	----	----	----	----	0.533454	----	----	----	0.512246	0.522279	----	0.513242	----	----	----	----
ZFP28	4	----	----	----	----	----	----	----	0.503252	----	----	----	----	0.526352	0.536504	0.546396	----	----	----	----
ZMIZ1	4	----	----	----	----	----	----	----	0.522369	----	----	----	0.544826	0.52838	----	0.516689	----	----	----	----
ZNF235	4	----	----	----	----	----	----	----	0.507833	----	----	----	----	0.510385	0.607846	0.646169	----	----	----	----
ZNF644	4	----	----	----	----	----	----	----	0.567616	----	----	----	----	0.556791	0.527365	0.568393	----	----	----	----
ZNF667	4	----	----	----	----	----	----	----	0.515836	----	----	----	----	0.524007	0.578379	0.54772	----	----	----	----
ZNF8	4	----	----	----	----	----	----	----	0.513009	----	----	----	----	0.527871	0.6281	0.63442	----	----	----	----
DYTN	4	----	----	----	----	----	----	----	----	----	0.649974	0.693964	0.506983	0.500134	----	----	----	----	----	----
ATG2B	4	----	----	----	----	----	----	----	----	----	----	----	0.502173	0.504862	0.564479	0.595521	----	----	----	----
BTRC	4	----	----	----	----	----	----	----	----	----	----	----	0.505149	0.529729	0.55213	0.506856	----	----	----	----
DCAF16	4	----	----	----	----	----	----	----	----	----	----	----	0.51745	0.507483	0.510704	0.525699	----	----	----	----
GAS2	4	----	----	----	----	----	----	----	----	----	----	----	0.502732	0.509775	0.577198	0.579467	----	----	----	----
GPR89B	4	----	----	----	----	----	----	----	----	----	----	----	0.512466	0.528298	0.582813	0.581548	----	----	----	----
METTL6	4	----	----	----	----	----	----	----	----	----	----	----	0.530907	0.539105	0.564388	0.529533	----	----	----	----
PCMTD2	4	----	----	----	----	----	----	----	----	----	----	----	0.511097	0.507041	0.538595	0.51618	----	----	----	----
SYNJ2BP	4	----	----	----	----	----	----	----	----	----	----	----	0.539713	0.518473	0.538968	0.510551	----	----	----	----
ZNF226	4	----	----	----	----	----	----	----	----	----	----	----	0.514338	0.548053	0.669362	0.658564	----	----	----	----
ZNF471	4	----	----	----	----	----	----	----	----	----	----	----	0.513968	0.53324	0.603489	0.562056	----	----	----	----
NLRP14	3	0.642177	0.713639	0.630593	----	----	----	----	----	----	----	----	----	----	----	----	----	----	----	----
ZC2HC1A	3	0.507285	0.521319	0.503103	----	----	----	----	----	----	----	----	----	----	----	----	----	----	----	----
ZNF214	3	0.77426	0.692609	0.743178	----	----	----	----	----	----	----	----	----	----	----	----	----	----	----	----
ZNF215	3	0.849791	0.836242	0.821953	----	----	----	----	----	----	----	----	----	----	----	----	----	----	----	----
ADH4	3	----	----	----	0.525	----	----	----	----	----	----	----	----	----	0.569271	0.558335	----	----	----	----
AGO3	3	----	----	----	0.521836	----	----	----	----	----	----	----	----	----	0.514413	0.528411	----	----	----	----
ALG10	3	----	----	----	0.638943	----	----	----	----	----	----	----	----	0.520124	----	0.510843	----	----	----	----
ANKRD36B	3	----	----	----	0.506116	----	----	----	----	----	----	----	----	----	0.534245	0.618738	----	----	----	----
ANKRD36C	3	----	----	----	0.569458	----	----	----	----	----	----	----	----	----	0.509819	0.617313	----	----	----	----
ARL13A	3	----	----	----	0.544664	----	----	----	----	----	----	----	----	----	0.579878	0.559435	----	----	----	----
ATP2C1	3	----	----	----	0.504716	----	----	----	----	----	0.575763	0.611739	----	----	----	----	----	----	----	----
BDNF	3	----	----	----	0.513603	----	----	----	----	----	----	----	----	----	0.557564	0.545249	----	----	----	----
BPTF	3	----	----	----	0.508979	----	----	----	----	----	----	----	----	----	0.627822	0.600491	----	----	----	----
C12orf66	3	----	----	----	0.656323	----	----	----	----	----	----	----	0.522131	0.532799	----	----	----	----	----	----
C1QTNF3-AMACR	3	----	----	----	0.514211	----	----	----	----	----	----	----	----	----	0.576968	0.572175	----	----	----	----
C21orf62	3	----	----	----	0.634739	----	----	----	----	----	----	----	----	----	0.579198	0.573465	----	----	----	----
CCDC102B	3	----	----	----	0.515269	----	----	----	----	----	----	----	----	----	0.532973	0.503865	----	----	----	----
CCDC62	3	----	----	----	0.504795	----	----	----	----	----	----	----	----	----	0.584468	0.530624	----	----	----	----
CDK12	3	----	----	----	0.521154	----	----	----	----	----	----	----	----	----	0.518327	0.515357	----	----	----	----
CEMIP	3	----	----	----	0.548103	----	----	----	----	----	----	----	----	----	0.625978	0.653409	----	----	----	----
CLDN20	3	----	----	----	0.585422	----	----	----	----	----	----	----	----	----	0.517222	0.574019	----	----	----	----
DNAH12	3	----	----	----	0.548517	----	----	----	----	----	----	----	----	----	0.526298	0.515378	----	----	----	----
EPG5	3	----	----	----	0.512327	----	----	----	----	----	----	----	----	----	0.563339	0.509829	----	----	----	----
FAM186B	3	----	----	----	0.571396	----	----	----	----	----	----	----	----	----	0.708616	0.684768	----	----	----	----
GNRHR	3	----	----	----	0.574343	----	----	----	----	----	----	----	----	----	0.536368	0.55045	----	----	----	----
GPR135	3	----	----	----	0.548941	----	----	----	----	----	----	----	----	----	0.519578	0.592112	----	----	----	----
GPR89A	3	----	----	----	0.518842	----	----	----	----	----	----	----	----	----	0.501276	0.561966	----	----	----	----
HMG20A	3	----	----	----	0.505086	----	----	----	----	----	----	----	----	----	0.540701	0.536713	----	----	----	----
IQCH	3	----	----	----	0.556902	----	----	----	----	----	----	----	----	----	0.557365	0.544841	----	----	----	----
LINC00675	3	----	----	----	0.544849	----	----	----	----	----	----	----	----	----	0.59474	0.562624	----	----	----	----
LRRC9	3	----	----	----	0.513814	----	----	----	----	----	----	----	----	----	0.545941	0.543285	----	----	----	----
MACF1	3	----	----	----	0.549394	----	----	----	----	----	----	----	----	----	0.562074	0.611074	----	----	----	----
MAK	3	----	----	----	0.533151	----	----	----	----	----	----	----	----	----	0.554322	0.550763	----	----	----	----
MBTD1	3	----	----	----	0.549152	----	----	----	----	----	----	----	----	----	0.550767	0.516821	----	----	----	----
MED28	3	----	----	----	0.552515	----	----	----	----	----	----	----	----	----	0.525734	0.50069	----	----	----	----
NFAT5	3	----	----	----	0.511475	----	----	----	----	----	----	----	----	----	0.556054	0.57062	----	----	----	----
NRIP2	3	----	----	----	0.554976	----	----	----	----	----	----	----	----	----	0.58283	0.56626	----	----	----	----
PCP4L1	3	----	----	----	0.513289	----	----	----	----	----	----	----	----	----	0.554374	0.553465	----	----	----	----
PHOSPHO2	3	----	----	----	0.55556	----	----	----	----	----	----	----	----	----	0.528902	0.545465	----	----	----	----
PIAS2	3	----	----	----	0.520542	----	----	----	----	----	----	----	----	0.525407	----	0.537682	----	----	----	----
PUS7L	3	----	----	----	0.581968	----	----	----	----	----	----	----	----	0.515673	----	0.510498	----	----	----	----
PVRIG	3	----	----	----	0.541658	----	----	----	----	----	----	----	----	----	0.50938	0.529944	----	----	----	----
RBP2	3	----	----	----	0.5893	----	----	----	----	----	----	----	----	----	0.58855	0.609122	----	----	----	----
RCOR3	3	----	----	----	0.503676	----	----	----	----	----	----	----	----	----	0.504936	0.520965	----	----	----	----
RRP8	3	----	----	----	0.517247	----	----	----	----	----	----	----	----	----	0.574604	0.563315	----	----	----	----
S100PBP	3	----	----	----	0.55617	----	----	----	----	----	----	----	----	----	0.526769	0.533649	----	----	----	----
SETD5	3	----	----	----	0.502576	----	----	----	----	----	----	----	----	----	0.535033	0.502262	----	----	----	----
SHPRH	3	----	----	----	0.569171	----	----	----	----	----	----	----	----	----	0.52977	0.610206	----	----	----	----
SLC38A4	3	----	----	----	0.600504	----	----	----	----	----	----	----	----	----	0.512161	0.532165	----	----	----	----
SMARCAD1	3	----	----	----	0.514373	----	----	----	----	----	----	----	----	----	0.507947	0.511485	----	----	----	----
SMG1	3	----	----	----	0.521548	----	----	----	----	----	----	----	----	----	0.52625	0.562144	----	----	----	----
TAS2R19	3	----	----	----	0.525382	----	----	----	----	----	----	----	----	----	0.501527	0.567208	----	----	----	----
TAS2R30	3	----	----	----	0.520816	----	----	----	0.556953	----	----	----	----	----	----	0.557954	----	----	----	----
TBC1D19	3	----	----	----	0.623826	----	----	----	----	----	----	----	----	0.520911	----	0.572736	----	----	----	----
TFDP2	3	----	----	----	0.508998	----	----	----	----	----	0.560441	0.635889	----	----	----	----	----	----	----	----
TNKS	3	----	----	----	0.507071	----	----	----	----	----	----	----	----	----	0.55649	0.533876	----	----	----	----
TTC17	3	----	----	----	0.567125	----	----	----	----	----	----	----	----	----	0.556413	0.5429	----	----	----	----
ZCCHC11	3	----	----	----	0.503606	----	----	----	----	----	----	----	----	----	0.558059	0.557494	----	----	----	----
ZNF250	3	----	----	----	0.51956	----	----	----	----	----	----	----	----	----	0.635845	0.615117	----	----	----	----
ZNF254	3	----	----	----	0.526802	----	----	----	----	----	----	----	----	----	0.526741	0.563782	----	----	----	----
ZNF280D	3	----	----	----	0.536851	----	----	----	----	----	----	----	----	----	0.51923	0.540676	----	----	----	----
ZNF33B	3	----	----	----	0.536816	----	----	----	----	----	----	----	----	----	0.526225	0.526943	----	----	----	----
ZNF431	3	----	----	----	0.51316	----	----	----	----	----	----	----	----	----	0.528735	0.525702	----	----	----	----
ZNF433	3	----	----	----	0.50595	----	----	----	----	----	----	----	----	----	0.5803	0.567762	----	----	----	----
ZNF552	3	----	----	----	0.542517	----	----	----	----	----	----	----	----	----	0.56534	0.570439	----	----	----	----
ZNF567	3	----	----	----	0.500551	----	----	----	----	----	----	----	----	----	0.552876	0.5426	----	----	----	----
ZNF586	3	----	----	----	0.537848	----	----	----	----	----	----	----	----	----	0.600115	0.624995	----	----	----	----
ZNF587	3	----	----	----	0.524202	----	----	----	----	----	----	----	----	----	0.53771	0.506152	----	----	----	----
ZNF660	3	----	----	----	0.567217	----	----	----	----	----	----	----	----	----	0.51398	0.514047	----	----	----	----
ZNF70	3	----	----	----	0.555483	----	----	----	----	----	----	----	----	----	0.513733	0.53336	----	----	----	----
ZNF708	3	----	----	----	0.50206	----	----	----	----	----	----	----	----	----	0.579376	0.581321	----	----	----	----
ZNF782	3	----	----	----	0.51086	----	----	----	----	----	----	----	----	----	0.530739	0.568543	----	----	----	----
ZNF814	3	----	----	----	0.515957	----	----	----	----	----	----	----	----	----	0.552004	0.581101	----	----	----	----
ZNF891	3	----	----	----	0.605462	----	----	----	----	----	----	----	----	----	0.513165	0.545709	----	----	----	----
ZRANB3	3	----	----	----	0.567383	----	----	----	----	----	----	----	----	----	0.507707	0.519404	----	----	----	----
ANGPT1	3	----	----	----	----	----	----	----	0.503695	----	----	----	0.529766	0.537929	----	----	----	----	----	----
CA13	3	----	----	----	----	----	----	----	0.537076	----	----	----	0.592419	0.555272	----	----	----	----	----	----
CCSER1	3	----	----	----	----	----	----	----	0.547234	----	----	----	0.548219	0.561474	----	----	----	----	----	----
CXXC5	3	----	----	----	----	----	----	----	0.529135	----	----	----	0.521805	0.509887	----	----	----	----	----	----
DNM3	3	----	----	----	----	----	----	----	0.525308	----	----	----	0.517481	0.534827	----	----	----	----	----	----
E2F5	3	----	----	----	----	----	----	----	0.534441	----	----	----	0.563389	0.558878	----	----	----	----	----	----
ELOVL7	3	----	----	----	----	----	----	----	0.531307	----	----	----	0.530803	0.580947	----	----	----	----	----	----
LATS1	3	----	----	----	----	----	----	----	0.511333	----	----	----	0.51913	0.552724	----	----	----	----	----	----
LRRC8B	3	----	----	----	----	----	----	----	0.552602	----	----	----	0.527754	0.546484	----	----	----	----	----	----
MAP7	3	----	----	----	----	----	----	----	0.51714	----	----	----	0.567875	0.537861	----	----	----	----	----	----
MAPRE2	3	----	----	----	----	----	----	----	0.546544	----	----	----	0.550875	0.559661	----	----	----	----	----	----
RNF103	3	----	----	----	----	----	----	----	0.503615	----	----	----	0.503834	0.501415	----	----	----	----	----	----
SMAD1	3	----	----	----	----	----	----	----	0.526963	----	----	----	0.547582	0.576668	----	----	----	----	----	----
TMEM135	3	----	----	----	----	----	----	----	0.503887	----	----	----	0.519447	0.541067	----	----	----	----	----	----
UBQLN3	3	----	----	----	----	----	----	----	0.50707	----	----	----	----	----	0.737082	0.722068	----	----	----	----
USP6NL	3	----	----	----	----	----	----	----	0.521905	----	----	----	0.539715	0.524994	----	----	----	----	----	----
XIRP2	3	----	----	----	----	----	----	----	0.552228	----	----	----	0.598374	0.587774	----	----	----	----	----	----
ZC3H12C	3	----	----	----	----	----	----	----	0.525423	----	----	----	0.541634	0.564382	----	----	----	----	----	----
ZNF135	3	----	----	----	----	----	----	----	0.537916	----	----	----	0.534317	0.537027	----	----	----	----	----	----
ZNF677	3	----	----	----	----	----	----	----	0.521773	----	----	----	0.516515	0.540057	----	----	----	----	----	----
ZNF724P	3	----	----	----	----	----	----	----	0.502858	----	----	----	----	0.519573	----	0.523841	----	----	----	----
EIF4ENIF1	3	----	----	----	----	----	----	----	----	----	0.510943	----	----	----	0.560533	0.543137	----	----	----	----
FGFR1OP2	3	----	----	----	----	----	----	----	----	----	0.562299	0.589215	----	0.502859	----	----	----	----	----	----
PEX13	3	----	----	----	----	----	----	----	----	----	0.516607	----	0.509618	0.53587	----	----	----	----	----	----
PHTF1	3	----	----	----	----	----	----	----	----	----	0.530755	0.539957	----	----	----	0.506013	----	----	----	----
PLA2G12A	3	----	----	----	----	----	----	----	----	----	0.526259	0.549944	0.510192	----	----	----	----	----	----	----
ZNF175	3	----	----	----	----	----	----	----	----	----	0.555059	0.504107	----	----	0.502618	----	----	----	----	----
ZNF568	3	----	----	----	----	----	----	----	----	----	0.508623	----	----	0.532604	----	0.526267	----	----	----	----
ZNF607	3	----	----	----	----	----	----	----	----	----	0.596485	0.565614	----	----	0.50832	----	----	----	----	----
MSI2	3	----	----	----	----	----	----	----	----	----	----	0.537543	0.524499	0.505281	----	----	----	----	----	----
GAN	3	----	----	----	----	----	----	----	----	----	----	----	0.529724	0.538141	----	0.520397	----	----	----	----
PSD2	3	----	----	----	----	----	----	----	----	----	----	----	0.511602	----	0.569884	0.577598	----	----	----	----
CACNB2	3	----	----	----	----	----	----	----	----	----	----	----	----	0.527722	0.669547	0.685835	----	----	----	----
DBT	3	----	----	----	----	----	----	----	----	----	----	----	----	0.501687	0.542942	0.504231	----	----	----	----
DYRK1A	3	----	----	----	----	----	----	----	----	----	----	----	----	0.518459	0.546044	0.54083	----	----	----	----
FAM120B	3	----	----	----	----	----	----	----	----	----	----	----	----	0.522961	0.59245	0.530669	----	----	----	----
FOXJ3	3	----	----	----	----	----	----	----	----	----	----	----	----	0.510912	0.528198	0.559481	----	----	----	----
KIAA1370	3	----	----	----	----	----	----	----	----	----	----	----	----	0.512556	0.5426	0.523475	----	----	----	----
KPNA5	3	----	----	----	----	----	----	----	----	----	----	----	----	0.518989	0.556058	0.577452	----	----	----	----
MON2	3	----	----	----	----	----	----	----	----	----	----	----	----	0.5064	0.503552	0.525674	----	----	----	----
MTMR8	3	----	----	----	----	----	----	----	----	----	----	----	----	0.544775	0.559341	0.554489	----	----	----	----
NEDD4	3	----	----	----	----	----	----	----	----	----	----	----	----	0.528029	0.534618	0.560718	----	----	----	----
SENP7	3	----	----	----	----	----	----	----	----	----	----	----	----	0.508142	0.572813	0.549477	----	----	----	----
TIGD7	3	----	----	----	----	----	----	----	----	----	----	----	----	0.518674	0.554873	0.552112	----	----	----	----
USP24	3	----	----	----	----	----	----	----	----	----	----	----	----	0.519758	0.570024	0.589937	----	----	----	----
USP34	3	----	----	----	----	----	----	----	----	----	----	----	----	0.506128	0.529536	0.56915	----	----	----	----
ZC3H12B	3	----	----	----	----	----	----	----	----	----	----	----	----	0.525995	0.559742	0.605748	----	----	----	----
ZIK1	3	----	----	----	----	----	----	----	----	----	----	----	----	0.509141	0.574043	0.560502	----	----	----	----
ZNF134	3	----	----	----	----	----	----	----	----	----	----	----	----	0.519711	0.594988	0.59863	----	----	----	----
ZNF17	3	----	----	----	----	----	----	----	----	----	----	----	----	0.519521	0.610038	0.582579	----	----	----	----
ZNF181	3	----	----	----	----	----	----	----	----	----	----	----	----	0.510671	0.549899	0.546396	----	----	----	----
ZNF227	3	----	----	----	----	----	----	----	----	----	----	----	----	0.547948	0.653789	0.631565	----	----	----	----
ZNF253	3	----	----	----	----	----	----	----	----	----	----	----	----	0.501131	0.546169	0.538341	----	----	----	----
ZNF260	3	----	----	----	----	----	----	----	----	----	----	----	----	0.529166	0.515047	0.549282	----	----	----	----
ZNF461	3	----	----	----	----	----	----	----	----	----	----	----	----	0.503028	0.527271	0.527205	----	----	----	----
ZNF525	3	----	----	----	----	----	----	----	----	----	----	----	----	0.536586	0.543998	0.542388	----	----	----	----
ZNF528	3	----	----	----	----	----	----	----	----	----	----	----	----	0.527517	0.608756	0.591568	----	----	----	----
ZNF540	3	----	----	----	----	----	----	----	----	----	----	----	----	0.535204	0.543022	0.542015	----	----	----	----
ZNF543	3	----	----	----	----	----	----	----	----	----	----	----	----	0.538389	0.54686	0.564625	----	----	----	----
ZNF544	3	----	----	----	----	----	----	----	----	----	----	----	----	0.513862	0.654692	0.620122	----	----	----	----
ZNF549	3	----	----	----	----	----	----	----	----	----	----	----	----	0.547573	0.633294	0.608456	----	----	----	----
ZNF585A	3	----	----	----	----	----	----	----	----	----	----	----	----	0.51942	0.592956	0.589219	----	----	----	----
ZNF585B	3	----	----	----	----	----	----	----	----	----	----	----	----	0.515891	0.592855	0.577996	----	----	----	----
ZNF605	3	----	----	----	----	----	----	----	----	----	----	----	----	0.501333	0.581356	0.561481	----	----	----	----
ZNF671	3	----	----	----	----	----	----	----	----	----	----	----	----	0.50221	0.6584	0.619714	----	----	----	----
ZNF781	3	----	----	----	----	----	----	----	----	----	----	----	----	0.50553	0.537121	0.506758	----	----	----	----
ZNF81	3	----	----	----	----	----	----	----	----	----	----	----	----	0.50719	0.538749	0.612388	----	----	----	----
ZNF829	3	----	----	----	----	----	----	----	----	----	----	----	----	0.521409	0.555988	0.562984	----	----	----	----
CD160	3	----	----	----	----	----	----	----	----	----	----	----	----	----	0.544838	0.521115	----	----	0.509715	----
CYP2A6	3	----	----	----	----	----	----	----	----	----	----	----	----	----	0.544102	0.506009	----	----	0.509656	----
FABP3	3	----	----	----	----	----	----	----	----	----	----	----	----	----	0.519373	0.502774	----	----	0.521937	----
MECP2	3	----	----	----	----	----	----	----	----	----	----	----	----	----	0.590697	0.598714	----	----	0.569559	----
NOL4L	3	----	----	----	----	----	----	----	----	----	----	----	----	----	0.614116	0.620683	----	----	0.513068	----
GRN	2	----	----	----	----	----	----	----	----	----	----	----	----	----	----	----	0.523425	0.52442	----	----
IL1RN	2	----	----	----	----	----	----	----	----	----	----	----	----	----	----	----	0.538866	0.581691	----	----
KIF1C	2	----	----	----	----	----	----	----	----	----	----	----	----	----	----	----	0.506356	0.505152	----	----
CDA	2	----	----	----	----	----	----	----	----	----	----	----	----	----	----	----	0.547813	0.606969	----	----
IFNGR2	2	----	----	----	----	----	----	----	----	----	----	----	----	----	----	----	0.521549	0.577936	----	----
LYZ	2	----	----	----	----	----	----	----	----	----	----	----	----	----	----	----	0.578112	0.636759	----	----
MNDA	2	----	----	----	----	----	----	----	----	----	----	----	----	----	----	----	0.562908	0.605395	----	----
PILRA	2	----	----	----	----	----	----	----	----	----	----	----	----	----	----	----	0.540994	0.535946	----	----
XKR6	2	----	0.500754	0.505059	----	----	----	----	----	----	----	----	----	----	----	----	----	----	----	----
ADH1A	2	----	----	----	0.534434	----	----	----	----	----	----	----	----	----	----	0.546608	----	----	----	----
ANKRD36	2	----	----	----	0.545983	----	----	----	----	----	----	----	----	----	----	0.617396	----	----	----	----
ATR	2	----	----	----	0.559831	----	----	----	----	----	----	----	----	----	----	0.520338	----	----	----	----
C2orf49	2	----	----	----	0.53038	----	----	----	----	----	----	----	0.506523	----	----	----	----	----	----	----
C5orf42	2	----	----	----	0.559265	----	----	----	----	----	----	----	----	----	----	0.502673	----	----	----	----
CARF	2	----	----	----	0.66316	----	----	----	----	----	----	----	----	----	0.50565	----	----	----	----	----
CCDC7	2	----	----	----	0.54923	----	----	----	----	----	----	----	----	----	----	0.500488	----	----	----	----
CLHC1	2	----	----	----	0.53526	----	----	----	----	----	----	----	----	----	0.506033	----	----	----	----	----
DET1	2	----	----	----	0.503739	----	----	----	----	----	----	----	----	----	0.505444	----	----	----	----	----
ENTPD3	2	----	----	----	0.536004	----	----	----	----	----	----	----	----	----	0.51985	----	----	----	----	----
GLIPR1L1	2	----	----	----	0.598593	----	----	----	----	----	----	----	----	0.501049	----	----	----	----	----	----
GPALPP1	2	----	----	----	0.585351	----	----	----	----	----	----	----	----	0.500352	----	----	----	----	----	----
KCNIP4	2	----	----	----	0.60163	----	----	----	----	----	----	----	----	----	----	0.539174	----	----	----	----
KIAA0408	2	----	----	----	0.570653	----	----	----	----	----	----	----	----	----	----	0.562112	----	----	----	----
MLYCD	2	----	----	----	0.580553	----	----	----	----	----	----	----	----	----	----	0.517187	----	----	----	----
NDUFAF6	2	----	----	----	0.515588	----	----	----	----	----	----	----	----	----	----	0.518222	----	----	----	----
NUDT13	2	----	----	----	0.502139	----	----	----	----	----	----	----	----	----	0.515584	----	----	----	----	----
PTCD2	2	----	----	----	0.547681	----	----	----	----	----	----	----	----	----	----	0.508261	----	----	----	----
RAB40AL	2	----	----	----	0.507124	----	----	----	----	----	----	----	----	----	----	0.590617	----	----	----	----
RAD51B	2	----	----	----	0.545281	----	----	----	----	----	----	----	----	----	----	0.516166	----	----	----	----
REV3L	2	----	----	----	0.584274	----	----	----	----	----	----	----	----	----	----	0.570014	----	----	----	----
RTTN	2	----	----	----	0.504669	----	----	----	----	----	----	----	----	----	----	0.513879	----	----	----	----
TAS2R13	2	----	----	----	0.602242	----	----	----	----	----	----	----	----	----	----	0.527323	----	----	----	----
TBCK	2	----	----	----	0.618348	----	----	----	----	----	----	----	----	----	----	0.522105	----	----	----	----
TMPRSS11D	2	----	----	----	0.520919	----	----	----	----	----	----	----	----	----	----	0.566518	----	----	----	----
ZKSCAN3	2	----	----	----	0.551933	----	----	----	----	----	0.505981	----	----	----	----	----	----	----	----	----
ZMYM2	2	----	----	----	0.571043	----	----	----	----	----	----	----	----	----	0.510638	----	----	----	----	----
ZNF770	2	----	----	----	0.502541	----	----	----	----	----	----	----	----	0.50458	----	----	----	----	----	----
FAM13A	2	----	----	----	----	----	----	----	0.533576	----	----	----	0.511673	----	----	----	----	----	----	----
NAT8	2	----	----	----	----	----	----	----	0.507999	----	----	----	----	----	----	0.568199	----	----	----	----
PHF3	2	----	----	----	----	----	----	----	0.510482	----	----	----	----	0.502739	----	----	----	----	----	----
STAM	2	----	----	----	----	----	----	----	0.503224	----	----	----	----	----	0.505828	----	----	----	----	----
TMEFF2	2	----	----	----	----	----	----	----	0.512846	----	----	----	0.510302	----	----	----	----	----	----	----
VPS13B	2	----	----	----	----	----	----	----	0.506114	----	----	----	----	----	----	0.582656	----	----	----	----
ADAMTS14	2	----	----	----	----	----	----	----	----	----	0.535103	0.521319	----	----	----	----	----	----	----	----
ANKRD27	2	----	----	----	----	----	----	----	----	----	0.516995	0.519144	----	----	----	----	----	----	----	----
AP4S1	2	----	----	----	----	----	----	----	----	----	0.585003	0.632259	----	----	----	----	----	----	----	----
ARSK	2	----	----	----	----	----	----	----	----	----	0.531175	0.525673	----	----	----	----	----	----	----	----
ATP1B1	2	----	----	----	----	----	----	----	----	----	0.546645	0.553483	----	----	----	----	----	----	----	----
BBOF1	2	----	----	----	----	----	----	----	----	----	0.53	0.562995	----	----	----	----	----	----	----	----
BIVM	2	----	----	----	----	----	----	----	----	----	0.597218	0.634504	----	----	----	----	----	----	----	----
C12orf65	2	----	----	----	----	----	----	----	----	----	0.524739	0.504782	----	----	----	----	----	----	----	----
C8orf37	2	----	----	----	----	----	----	----	----	----	0.504208	0.503204	----	----	----	----	----	----	----	----
CABLES1	2	----	----	----	----	----	----	----	----	----	0.532102	0.53776	----	----	----	----	----	----	----	----
CBY1	2	----	----	----	----	----	----	----	----	----	0.529919	0.530865	----	----	----	----	----	----	----	----
CCDC180	2	----	----	----	----	----	----	----	----	----	0.514346	0.509149	----	----	----	----	----	----	----	----
DNMT3B	2	----	----	----	----	----	----	----	----	----	0.527306	0.555991	----	----	----	----	----	----	----	----
EFCAB7	2	----	----	----	----	----	----	----	----	----	0.510231	0.523743	----	----	----	----	----	----	----	----
EFHC2	2	----	----	----	----	----	----	----	----	----	0.560942	0.560566	----	----	----	----	----	----	----	----
EXD2	2	----	----	----	----	----	----	----	----	----	0.579992	0.58354	----	----	----	----	----	----	----	----
EXTL2	2	----	----	----	----	----	----	----	----	----	0.513242	0.521927	----	----	----	----	----	----	----	----
FAM149B1	2	----	----	----	----	----	----	----	----	----	0.506433	----	----	----	0.51145	----	----	----	----	----
FAN1	2	----	----	----	----	----	----	----	----	----	0.505495	0.505868	----	----	----	----	----	----	----	----
GATA2	2	----	----	----	----	----	----	----	----	----	0.534296	0.547525	----	----	----	----	----	----	----	----
GCSAML	2	----	----	----	----	----	----	----	----	----	0.848398	0.869483	----	----	----	----	----	----	----	----
GPR146	2	----	----	----	----	----	----	----	----	----	0.508838	0.516559	----	----	----	----	----	----	----	----
GPR174	2	----	----	----	----	----	----	----	----	----	0.633125	0.635093	----	----	----	----	----	----	----	----
INPP5B	2	----	----	----	----	----	----	----	----	----	0.531393	0.544332	----	----	----	----	----	----	----	----
INTS13	2	----	----	----	----	----	----	----	----	----	0.541916	0.55749	----	----	----	----	----	----	----	----
IRAK1BP1	2	----	----	----	----	----	----	----	----	----	0.507604	0.524888	----	----	----	----	----	----	----	----
MACC1	2	----	----	----	----	----	----	----	----	----	0.54655	0.552484	----	----	----	----	----	----	----	----
MEX3B	2	----	----	----	----	----	----	----	----	----	0.570036	0.576688	----	----	----	----	----	----	----	----
NEK5	2	----	----	----	----	----	----	----	----	----	0.515549	0.574374	----	----	----	----	----	----	----	----
NFE2	2	----	----	----	----	----	----	----	----	----	0.543175	0.543976	----	----	----	----	----	----	----	----
NIPAL3	2	----	----	----	----	----	----	----	----	----	0.573538	0.543417	----	----	----	----	----	----	----	----
PEX3	2	----	----	----	----	----	----	----	----	----	0.574416	0.581885	----	----	----	----	----	----	----	----
PLCH1	2	----	----	----	----	----	----	----	----	----	0.552876	0.576581	----	----	----	----	----	----	----	----
PPIL6	2	----	----	----	----	----	----	----	----	----	0.550133	0.590151	----	----	----	----	----	----	----	----
SFRP4	2	----	----	----	----	----	----	----	----	----	0.538908	0.505451	----	----	----	----	----	----	----	----
SLA2	2	----	----	----	----	----	----	----	----	----	0.53973	0.558531	----	----	----	----	----	----	----	----
SPIN4	2	----	----	----	----	----	----	----	----	----	0.554054	0.595057	----	----	----	----	----	----	----	----
STXBP5	2	----	----	----	----	----	----	----	----	----	0.532349	0.532363	----	----	----	----	----	----	----	----
TEX30	2	----	----	----	----	----	----	----	----	----	0.557433	0.600088	----	----	----	----	----	----	----	----
TP53BP1	2	----	----	----	----	----	----	----	----	----	0.536528	0.550573	----	----	----	----	----	----	----	----
TTLL10	2	----	----	----	----	----	----	----	----	----	0.637632	0.614497	----	----	----	----	----	----	----	----
XKR3	2	----	----	----	----	----	----	----	----	----	0.550551	0.541916	----	----	----	----	----	----	----	----
ZNF445	2	----	----	----	----	----	----	----	----	----	0.530628	0.541499	----	----	----	----	----	----	----	----
ZNF527	2	----	----	----	----	----	----	----	----	----	0.507593	----	----	----	----	0.522335	----	----	----	----
PRKACB	2	----	----	----	----	----	----	----	----	----	----	0.504261	----	0.512938	----	----	----	----	----	----
ZNF10	2	----	----	----	----	----	----	----	----	----	----	0.502664	----	----	0.524448	----	----	----	----	----
ABLIM1	2	----	----	----	----	----	----	----	----	----	----	----	0.521124	0.533033	----	----	----	----	----	----
AFAP1L2	2	----	----	----	----	----	----	----	----	----	----	----	0.506569	0.505328	----	----	----	----	----	----
CD2AP	2	----	----	----	----	----	----	----	----	----	----	----	0.511182	0.534034	----	----	----	----	----	----
DYRK3	2	----	----	----	----	----	----	----	----	----	----	----	0.52601	0.542768	----	----	----	----	----	----
ESR1	2	----	----	----	----	----	----	----	----	----	----	----	0.537921	0.537634	----	----	----	----	----	----
FREM3	2	----	----	----	----	----	----	----	----	----	----	----	0.508723	0.523408	----	----	----	----	----	----
LNX2	2	----	----	----	----	----	----	----	----	----	----	----	0.539554	0.521584	----	----	----	----	----	----
TRIM23	2	----	----	----	----	----	----	----	----	----	----	----	0.503638	0.520356	----	----	----	----	----	----
NPAT	2	----	----	----	----	----	----	----	----	----	----	----	----	0.500047	----	0.514855	----	----	----	----
NRIP1	2	----	----	----	----	----	----	----	----	----	----	----	----	0.526436	----	0.509237	----	----	----	----
PHC3	2	----	----	----	----	----	----	----	----	----	----	----	----	0.508762	----	0.506135	----	----	----	----
RICTOR	2	----	----	----	----	----	----	----	----	----	----	----	----	0.505683	----	0.516483	----	----	----	----
RSPH1	2	----	----	----	----	----	----	----	----	----	----	----	----	0.510872	----	0.520389	----	----	----	----
TEX9	2	----	----	----	----	----	----	----	----	----	----	----	----	0.527116	----	0.502893	----	----	----	----
ZNF329	2	----	----	----	----	----	----	----	----	----	----	----	----	0.535336	0.502977	----	----	----	----	----
ZNF383	2	----	----	----	----	----	----	----	----	----	----	----	----	0.531891	----	0.502154	----	----	----	----
ZNF419	2	----	----	----	----	----	----	----	----	----	----	----	----	0.526715	0.532618	----	----	----	----	----
ZNF426	2	----	----	----	----	----	----	----	----	----	----	----	----	0.540978	0.517341	----	----	----	----	----
ZNF681	2	----	----	----	----	----	----	----	----	----	----	----	----	0.516146	----	0.515723	----	----	----	----
AC010642.1	2	----	----	----	----	----	----	----	----	----	----	----	----	----	0.651624	0.656473	----	----	----	----
AC092835.2	2	----	----	----	----	----	----	----	----	----	----	----	----	----	0.541453	0.591893	----	----	----	----
AGBL3	2	----	----	----	----	----	----	----	----	----	----	----	----	----	0.501391	0.543764	----	----	----	----
ALG13	2	----	----	----	----	----	----	----	----	----	----	----	----	----	0.529254	0.527602	----	----	----	----
ALMS1	2	----	----	----	----	----	----	----	----	----	----	----	----	----	0.503771	0.572991	----	----	----	----
ANKAR	2	----	----	----	----	----	----	----	----	----	----	----	----	----	0.506326	0.506727	----	----	----	----
ANKRD17	2	----	----	----	----	----	----	----	----	----	----	----	----	----	0.506135	0.517877	----	----	----	----
ANKRD23	2	----	----	----	----	----	----	----	----	----	----	----	----	----	0.523719	0.506368	----	----	----	----
APOBEC3F	2	----	----	----	----	----	----	----	----	----	----	----	----	----	0.518916	0.526549	----	----	----	----
ASH1L	2	----	----	----	----	----	----	----	----	----	----	----	----	----	0.518961	0.57038	----	----	----	----
ASPRV1	2	----	----	----	----	----	----	----	----	----	----	----	----	----	0.571928	0.539411	----	----	----	----
ATP6V0A2	2	----	----	----	----	----	----	----	----	----	----	----	----	----	0.545274	0.530519	----	----	----	----
ATP7A	2	----	----	----	----	----	----	----	----	----	----	----	----	----	0.525877	0.51435	----	----	----	----
AWAT1	2	----	----	----	----	----	----	----	----	----	----	----	----	----	0.509247	0.51298	----	----	----	----
BIRC6	2	----	----	----	----	----	----	----	----	----	----	----	----	----	0.524963	0.575674	----	----	----	----
C6orf201	2	----	----	----	----	----	----	----	----	----	----	----	----	----	0.535556	0.520924	----	----	----	----
CCDC181	2	----	----	----	----	----	----	----	----	----	----	----	----	----	0.528916	0.557633	----	----	----	----
CEACAM1	2	----	----	----	----	----	----	----	----	----	----	----	----	----	0.510202	0.544263	----	----	----	----
CEP68	2	----	----	----	----	----	----	----	----	----	----	----	----	----	0.544716	0.555657	----	----	----	----
CHD6	2	----	----	----	----	----	----	----	----	----	----	----	----	----	0.666535	0.661359	----	----	----	----
CORT	2	----	----	----	----	----	----	----	----	----	----	----	----	----	0.502848	0.503601	----	----	----	----
CTD-2192J16.20	2	----	----	----	----	----	----	----	----	----	----	----	----	----	0.554374	0.511415	----	----	----	----
CTD-2643I7.5	2	----	----	----	----	----	----	----	----	----	----	----	----	----	0.632161	0.562666	----	----	----	----
CXCL17	2	----	----	----	----	----	----	----	----	----	----	----	----	----	0.604538	0.579035	----	----	----	----
CYP4A22	2	----	----	----	----	----	----	----	----	----	----	----	----	----	0.510914	0.524432	----	----	----	----
DGAT2L6	2	----	----	----	----	----	----	----	----	----	----	----	----	----	0.592193	0.559787	----	----	----	----
DNAH3	2	----	----	----	----	----	----	----	----	----	----	----	----	----	0.507386	0.529491	----	----	----	----
DUOX1	2	----	----	----	----	----	----	----	----	----	----	----	----	----	0.515277	0.547856	----	----	----	----
EDRF1	2	----	----	----	----	----	----	----	----	----	----	----	----	----	0.502081	0.556992	----	----	----	----
EFCAB5	2	----	----	----	----	----	----	----	----	----	----	----	----	----	0.528797	0.540742	----	----	----	----
EHMT1	2	----	----	----	----	----	----	----	----	----	----	----	----	----	0.528797	0.523025	----	----	----	----
EPC1	2	----	----	----	----	----	----	----	----	----	----	----	----	----	0.580432	0.549631	----	----	----	----
ERCC6	2	----	----	----	----	----	----	----	----	----	----	----	----	----	0.53749	0.536584	----	----	----	----
ERCC6L2	2	----	----	----	----	----	----	----	----	----	----	----	----	----	0.549648	0.56596	----	----	----	----
ESYT3	2	----	----	----	----	----	----	----	----	----	----	----	----	----	0.527884	0.54993	----	----	----	----
FAAH2	2	----	----	----	----	----	----	----	----	----	----	----	----	----	0.568142	0.565131	----	----	----	----
FAM160B1	2	----	----	----	----	----	----	----	----	----	----	----	----	----	0.529035	0.563639	----	----	----	----
FAM193A	2	----	----	----	----	----	----	----	----	----	----	----	----	----	0.568146	0.544998	----	----	----	----
FAM208B	2	----	----	----	----	----	----	----	----	----	----	----	----	----	0.505681	0.509038	----	----	----	----
FOXR1	2	----	----	----	----	----	----	----	----	----	----	----	----	----	0.507069	0.536963	----	----	----	----
FRYL	2	----	----	----	----	----	----	----	----	----	----	----	----	----	0.535019	0.53595	----	----	----	----
GATS	2	----	----	----	----	----	----	----	----	----	----	----	----	----	0.565755	0.565772	----	----	----	----
GLI1	2	----	----	----	----	----	----	----	----	----	----	----	----	----	0.581851	0.544127	----	----	----	----
GNPDA2	2	----	----	----	----	----	----	----	----	----	----	----	----	----	0.509937	0.524667	----	----	----	----
GPATCH8	2	----	----	----	----	----	----	----	----	----	----	----	----	----	0.547829	0.534705	----	----	----	----
GPR179	2	----	----	----	----	----	----	----	----	----	----	----	----	----	0.500596	0.520136	----	----	----	----
GPR75	2	----	----	----	----	----	----	----	----	----	----	----	----	----	0.551582	0.551203	----	----	----	----
GRIK5	2	----	----	----	----	----	----	----	----	----	----	----	----	----	0.513221	0.503475	----	----	----	----
HEATR4	2	----	----	----	----	----	----	----	----	----	----	----	----	----	0.585357	0.532325	----	----	----	----
HERC2	2	----	----	----	----	----	----	----	----	----	----	----	----	----	0.583133	0.582234	----	----	----	----
HTR3E	2	----	----	----	----	----	----	----	----	----	----	----	----	----	0.580785	0.561945	----	----	----	----
KAT6A	2	----	----	----	----	----	----	----	----	----	----	----	----	----	0.504036	0.502046	----	----	----	----
KAT6B	2	----	----	----	----	----	----	----	----	----	----	----	----	----	0.564604	0.597734	----	----	----	----
KCNK12	2	----	----	----	----	----	----	----	----	----	----	----	----	----	0.574726	0.62519	----	----	----	----
KCNV2	2	----	----	----	----	----	----	----	----	----	----	----	----	----	0.540885	0.581938	----	----	----	----
L3MBTL1	2	----	----	----	----	----	----	----	----	----	----	----	----	----	0.526985	0.500718	----	----	----	----
LIPE	2	----	----	----	----	----	----	----	----	----	----	----	----	----	0.563465	0.530484	----	----	----	----
MAP3K4	2	----	----	----	----	----	----	----	----	----	----	----	----	----	0.523625	0.547912	----	----	----	----
MDN1	2	----	----	----	----	----	----	----	----	----	----	----	----	----	0.521419	0.572227	----	----	----	----
MEGF11	2	----	----	----	----	----	----	----	----	----	----	----	----	----	0.502429	0.54167	----	----	----	----
MGEA5	2	----	----	----	----	----	----	----	----	----	----	----	----	----	0.557661	0.506762	----	----	----	----
MKL2	2	----	----	----	----	----	----	----	----	----	----	----	----	----	0.544231	0.540164	----	----	----	----
MPP5	2	----	----	----	----	----	----	----	----	----	----	----	----	----	0.500045	0.505288	----	----	----	----
NEB	2	----	----	----	----	----	----	----	----	----	----	----	----	----	0.509352	0.574629	----	----	----	----
NPIPB6	2	----	----	----	----	----	----	----	----	----	----	----	----	----	0.568881	0.55168	----	----	----	----
NSUN6	2	----	----	----	----	----	----	----	----	----	----	----	----	----	0.526459	0.532165	----	----	----	----
NT5C1B	2	----	----	----	----	----	----	----	----	----	----	----	----	----	0.525452	0.609528	----	----	----	----
NUTM2A	2	----	----	----	----	----	----	----	----	----	----	----	----	----	0.502363	0.539052	----	----	----	----
NUTM2D	2	----	----	----	----	----	----	----	----	----	----	----	----	----	0.524803	0.586926	----	----	----	----
ODF2L	2	----	----	----	----	----	----	----	----	----	----	----	----	----	0.53587	0.571562	----	----	----	----
PDZK1	2	----	----	----	----	----	----	----	----	----	----	----	----	----	0.568369	0.580188	----	----	----	----
PIPOX	2	----	----	----	----	----	----	----	----	----	----	----	----	----	0.552517	0.516148	----	----	----	----
PIWIL2	2	----	----	----	----	----	----	----	----	----	----	----	----	----	0.63191	0.599397	----	----	----	----
PLP1	2	----	----	----	----	----	----	----	----	----	----	----	----	----	0.535424	0.540926	----	----	----	----
POGZ	2	----	----	----	----	----	----	----	----	----	----	----	----	----	0.578972	0.580777	----	----	----	----
POLR2F	2	----	----	----	----	----	----	----	----	----	----	----	----	----	0.611474	0.587978	----	----	----	----
PRDM15	2	----	----	----	----	----	----	----	----	----	----	----	----	----	0.522036	0.541659	----	----	----	----
PRPF40B	2	----	----	----	----	----	----	----	----	----	----	----	----	----	0.55816	0.513771	----	----	----	----
PTAR1	2	----	----	----	----	----	----	----	----	----	----	----	----	----	0.509672	0.531258	----	----	----	----
RNF43	2	----	----	----	----	----	----	----	----	----	----	----	----	----	0.535193	0.519697	----	----	----	----
RP11-111M22.2	2	----	----	----	----	----	----	----	----	----	----	----	----	----	0.523339	0.505873	----	----	----	----
RP11-287D1.3	2	----	----	----	----	----	----	----	----	----	----	----	----	----	0.548784	0.594549	----	----	----	----
RP11-849H4.2	2	----	----	----	----	----	----	----	----	----	----	----	----	----	0.533458	0.578316	----	----	----	----
RP11-889L3.3	2	----	----	----	----	----	----	----	----	----	----	----	----	----	0.514922	0.545016	----	----	----	----
SCGB2B2	2	----	----	----	----	----	----	----	----	----	----	----	----	----	0.550101	0.590474	----	----	----	----
SCN11A	2	----	----	----	----	----	----	----	----	----	----	----	----	----	0.560638	0.507117	----	----	----	----
SCYL3	2	----	----	----	----	----	----	----	----	----	----	----	----	----	0.607745	0.612454	----	----	----	----
SETMAR	2	----	----	----	----	----	----	----	----	----	----	----	----	----	0.530056	0.522959	----	----	----	----
SEZ6	2	----	----	----	----	----	----	----	----	----	----	----	----	----	0.538703	0.509014	----	----	----	----
SGK2	2	----	----	----	----	----	----	----	----	----	----	----	----	----	0.5503	0.521973	----	----	----	----
SLC25A53	2	----	----	----	----	----	----	----	----	----	----	----	----	----	0.543332	0.504078	----	----	----	----
SLC4A5	2	----	----	----	----	----	----	----	----	----	----	----	----	----	0.61985	0.605727	----	----	----	----
SMIM8	2	----	----	----	----	----	----	----	----	----	----	----	----	----	0.548278	0.540913	----	----	----	----
SMTNL1	2	----	----	----	----	----	----	----	----	----	----	----	----	----	0.547745	0.541656	----	----	----	----
SPINK7	2	----	----	----	----	----	----	----	----	----	----	----	----	----	0.509612	0.510076	----	----	----	----
SPRN	2	----	----	----	----	----	----	----	----	----	----	----	----	----	0.5377	0.53481	----	----	----	----
SPTBN1	2	----	----	----	----	----	----	----	----	----	----	----	----	----	0.528703	0.51634	----	----	----	----
STAG3	2	----	----	----	----	----	----	----	----	----	----	----	----	----	0.512464	0.527184	----	----	----	----
STKLD1	2	----	----	----	----	----	----	----	----	----	----	----	----	----	0.536187	0.52335	----	----	----	----
STRBP	2	----	----	----	----	----	----	----	----	----	----	----	----	----	0.535852	0.554991	----	----	----	----
TACR1	2	----	----	----	----	----	----	----	----	----	----	----	----	----	0.526595	0.568679	----	----	----	----
TAF1	2	----	----	----	----	----	----	----	----	----	----	----	----	----	0.520561	0.5281	----	----	----	----
TAF8	2	----	----	----	----	----	----	----	----	----	----	----	----	----	0.529951	0.511419	----	----	----	----
TOGARAM1	2	----	----	----	----	----	----	----	----	----	----	----	----	----	0.534758	0.538944	----	----	----	----
TP53INP1	2	----	----	----	----	----	----	----	----	----	----	----	----	----	0.509212	0.543161	----	----	----	----
TRANK1	2	----	----	----	----	----	----	----	----	----	----	----	----	----	0.538379	0.513398	----	----	----	----
TRMT13	2	----	----	----	----	----	----	----	----	----	----	----	----	----	0.553081	0.5213	----	----	----	----
TRMT44	2	----	----	----	----	----	----	----	----	----	----	----	----	----	0.565828	0.5706	----	----	----	----
TSPAN11	2	----	----	----	----	----	----	----	----	----	----	----	----	----	0.504751	0.510746	----	----	----	----
UBQLNL	2	----	----	----	----	----	----	----	----	----	----	----	----	----	0.760307	0.689658	----	----	----	----
UBR5	2	----	----	----	----	----	----	----	----	----	----	----	----	----	0.54398	0.601084	----	----	----	----
UNK	2	----	----	----	----	----	----	----	----	----	----	----	----	----	0.509345	0.516636	----	----	----	----
USP49	2	----	----	----	----	----	----	----	----	----	----	----	----	----	0.54031	0.527187	----	----	----	----
VEZT	2	----	----	----	----	----	----	----	----	----	----	----	----	----	0.531562	0.522642	----	----	----	----
ZBTB37	2	----	----	----	----	----	----	----	----	----	----	----	----	----	0.520087	0.523203	----	----	----	----
ZBTB39	2	----	----	----	----	----	----	----	----	----	----	----	----	----	0.509895	0.539718	----	----	----	----
ZFP62	2	----	----	----	----	----	----	----	----	----	----	----	----	----	0.525884	0.528184	----	----	----	----
ZNF136	2	----	----	----	----	----	----	----	----	----	----	----	----	----	0.507142	0.509282	----	----	----	----
ZNF157	2	----	----	----	----	----	----	----	----	----	----	----	----	----	0.520704	0.532353	----	----	----	----
ZNF177	2	----	----	----	----	----	----	----	----	----	----	----	----	----	0.547765	0.549291	----	----	----	----
ZNF221	2	----	----	----	----	----	----	----	----	----	----	----	----	----	0.606124	0.592063	----	----	----	----
ZNF233	2	----	----	----	----	----	----	----	----	----	----	----	----	----	0.545783	0.599237	----	----	----	----
ZNF234	2	----	----	----	----	----	----	----	----	----	----	----	----	----	0.509871	0.512715	----	----	----	----
ZNF251	2	----	----	----	----	----	----	----	----	----	----	----	----	----	0.560516	0.522276	----	----	----	----
ZNF274	2	----	----	----	----	----	----	----	----	----	----	----	----	----	0.541575	0.501882	----	----	----	----
ZNF283	2	----	----	----	----	----	----	----	----	----	----	----	----	----	0.518926	0.507954	----	----	----	----
ZNF285	2	----	----	----	----	----	----	----	----	----	----	----	----	----	0.539348	0.502339	----	----	----	----
ZNF302	2	----	----	----	----	----	----	----	----	----	----	----	----	----	0.52648	0.533862	----	----	----	----
ZNF320	2	----	----	----	----	----	----	----	----	----	----	----	----	----	0.525985	0.50626	----	----	----	----
ZNF337	2	----	----	----	----	----	----	----	----	----	----	----	----	----	0.520892	0.536629	----	----	----	----
ZNF439	2	----	----	----	----	----	----	----	----	----	----	----	----	----	0.529655	0.529798	----	----	----	----
ZNF45	2	----	----	----	----	----	----	----	----	----	----	----	----	----	0.58664	0.525291	----	----	----	----
ZNF496	2	----	----	----	----	----	----	----	----	----	----	----	----	----	0.555044	0.571035	----	----	----	----
ZNF507	2	----	----	----	----	----	----	----	----	----	----	----	----	----	0.513806	0.522328	----	----	----	----
ZNF510	2	----	----	----	----	----	----	----	----	----	----	----	----	----	0.558341	0.567525	----	----	----	----
ZNF529	2	----	----	----	----	----	----	----	----	----	----	----	----	----	0.543018	0.54969	----	----	----	----
ZNF546	2	----	----	----	----	----	----	----	----	----	----	----	----	----	0.545333	0.551335	----	----	----	----
ZNF559	2	----	----	----	----	----	----	----	----	----	----	----	----	----	0.554814	0.543963	----	----	----	----
ZNF582	2	----	----	----	----	----	----	----	----	----	----	----	----	----	0.573231	0.505936	----	----	----	----
ZNF594	2	----	----	----	----	----	----	----	----	----	----	----	----	----	0.562712	0.570443	----	----	----	----
ZNF610	2	----	----	----	----	----	----	----	----	----	----	----	----	----	0.560579	0.575573	----	----	----	----
ZNF649	2	----	----	----	----	----	----	----	----	----	----	----	----	----	0.53375	0.500369	----	----	----	----
ZNF665	2	----	----	----	----	----	----	----	----	----	----	----	----	----	0.531969	0.568724	----	----	----	----
ZNF765	2	----	----	----	----	----	----	----	----	----	----	----	----	----	0.556236	0.519672	----	----	----	----
ZNF84	2	----	----	----	----	----	----	----	----	----	----	----	----	----	0.53915	0.532823	----	----	----	----
ZRANB1	2	----	----	----	----	----	----	----	----	----	----	----	----	----	0.515577	0.522858	----	----	----	----
ZSCAN12	2	----	----	----	----	----	----	----	----	----	----	----	----	----	0.511185	0.517198	----	----	----	----
ZSCAN18	2	----	----	----	----	----	----	----	----	----	----	----	----	----	0.544224	0.528825	----	----	----	----
ACPP	2	----	----	----	----	----	----	----	----	----	----	----	----	----	----	----	0.531463	0.603645	----	----
ADAP2	2	----	----	----	----	----	----	----	----	----	----	----	----	----	----	----	0.51851	0.567149	----	----
ADGRE3	2	----	----	----	----	----	----	----	----	----	----	----	----	----	----	----	0.510976	0.520227	----	----
AGTRAP	2	----	----	----	----	----	----	----	----	----	----	----	----	----	----	----	0.507638	0.558063	----	----
APOA2	2	----	----	----	----	----	----	----	----	----	----	----	----	----	----	----	0.620571	0.643932	----	----
APOBEC3A	2	----	----	----	----	----	----	----	----	----	----	----	----	----	----	----	0.521221	0.54739	----	----
ARAP3	2	----	----	----	----	----	----	----	----	----	----	----	----	----	----	----	0.625235	0.640287	----	----
ARHGEF10L	2	----	----	----	----	----	----	----	----	----	----	----	----	----	----	----	0.51044	0.525677	----	----
ARPC5	2	----	----	----	----	----	----	----	----	----	----	----	----	----	----	----	0.520166	0.613874	----	----
ASAP1	2	----	----	----	----	----	----	----	----	----	----	----	----	----	----	----	0.556571	0.667291	----	----
ATG7	2	----	----	----	----	----	----	----	----	----	----	----	----	----	----	----	0.553245	0.582922	----	----
BCL6	2	----	----	----	----	----	----	----	----	----	----	----	----	----	----	----	0.502834	0.555755	----	----
BST1	2	----	----	----	----	----	----	----	----	----	----	----	----	----	----	----	0.573843	0.644439	----	----
C19orf38	2	----	----	----	----	----	----	----	----	----	----	----	----	----	----	----	0.532057	0.550681	----	----
C19orf59	2	----	----	----	----	----	----	----	----	----	----	----	----	----	----	----	0.598	0.651673	----	----
C5AR1	2	----	----	----	----	----	----	----	----	----	----	----	----	----	----	----	0.531023	0.599838	----	----
C9orf47	2	----	----	----	----	----	----	----	----	----	----	----	----	----	----	----	0.555871	0.597461	----	----
CCR1	2	----	----	----	----	----	----	----	----	----	----	----	----	----	----	----	0.554688	0.589347	----	----
CD14	2	----	----	----	----	----	----	----	----	----	----	----	----	----	----	----	0.520476	0.555159	----	----
CD1D	2	----	----	----	----	----	----	----	----	----	----	----	----	----	----	----	0.511729	0.54598	----	----
CEBPB	2	----	----	----	----	----	----	----	----	----	----	----	----	----	----	----	0.537818	0.510357	----	----
COTL1	2	----	----	----	----	----	----	----	----	----	----	----	----	----	----	----	0.510964	0.548568	----	----
CPM	2	----	----	----	----	----	----	----	----	----	----	----	----	----	----	----	0.536239	0.604403	----	----
CRISPLD2	2	----	----	----	----	----	----	----	----	----	----	----	----	----	----	----	0.533084	0.579989	----	----
CSAR2	2	----	----	----	----	----	----	----	----	----	----	----	----	----	----	----	0.541979	0.56887	----	----
CYBB	2	----	----	----	----	----	----	----	----	----	----	----	----	----	----	----	0.54027	0.587728	----	----
CYP27A1	2	----	----	----	----	----	----	----	----	----	----	----	----	----	----	----	0.531925	0.521793	----	----
DNAJC5	2	----	----	----	----	----	----	----	----	----	----	----	----	----	----	----	0.557664	0.545931	----	----
EVI5	2	----	----	----	----	----	----	----	----	----	----	----	----	----	----	----	0.561011	0.601563	----	----
F5	2	----	----	----	----	----	----	----	----	----	----	----	----	----	----	----	0.530244	0.615242	----	----
FAM198B	2	----	----	----	----	----	----	----	----	----	----	----	----	----	----	----	0.505895	0.552599	----	----
FAM49A	2	----	----	----	----	----	----	----	----	----	----	----	----	----	----	----	0.510775	0.578991	----	----
FBXL5	2	----	----	----	----	----	----	----	----	----	----	----	----	----	----	----	0.5236	0.645764	----	----
FCAR	2	----	----	----	----	----	----	----	----	----	----	----	----	----	----	----	0.585937	0.678137	----	----
FCGR2A	2	----	----	----	----	----	----	----	----	----	----	----	----	----	----	----	0.519911	0.53209	----	----
FCN1	2	----	----	----	----	----	----	----	----	----	----	----	----	----	----	----	0.553168	0.561564	----	----
FFAR2	2	----	----	----	----	----	----	----	----	----	----	----	----	----	----	----	0.503649	0.527457	----	----
FGL2	2	----	----	----	----	----	----	----	----	----	----	----	----	----	----	----	0.506586	0.586798	----	----
FGR	2	----	----	----	----	----	----	----	----	----	----	----	----	----	----	----	0.569808	0.607543	----	----
FKBP15	2	----	----	----	----	----	----	----	----	----	----	----	----	----	----	----	0.519292	0.539319	----	----
GNS	2	----	----	----	----	----	----	----	----	----	----	----	----	----	----	----	0.515121	0.574411	----	----
GPR132	2	----	----	----	----	----	----	----	----	----	----	----	----	----	----	----	0.534007	0.53676	----	----
HCK	2	----	----	----	----	----	----	----	----	----	----	----	----	----	----	----	0.595362	0.639729	----	----
HK3	2	----	----	----	----	----	----	----	----	----	----	----	----	----	----	----	0.543767	0.594097	----	----
HSPA6	2	----	----	----	----	----	----	----	----	----	----	----	----	----	----	----	0.50324	0.521139	----	----
ITGAM	2	----	----	----	----	----	----	----	----	----	----	----	----	----	----	----	0.587974	0.599132	----	----
KCNE1	2	----	----	----	----	----	----	----	----	----	----	----	----	----	----	----	0.550398	0.609448	----	----
KCNJ2	2	----	----	----	----	----	----	----	----	----	----	----	----	----	----	----	0.509468	0.518432	----	----
LILRA6	2	----	----	----	----	----	----	----	----	----	----	----	----	----	----	----	0.502419	0.520836	----	----
LILRB2	2	----	----	----	----	----	----	----	----	----	----	----	----	----	----	----	0.501933	0.506376	----	----
LIPN	2	----	----	----	----	----	----	----	----	----	----	----	----	----	----	----	0.516705	0.606683	----	----
LRRC25	2	----	----	----	----	----	----	----	----	----	----	----	----	----	----	----	0.573284	0.584428	----	----
LRRK2	2	----	----	----	----	----	----	----	----	----	----	----	----	----	----	----	0.506985	0.583743	----	----
MAST3	2	----	----	----	----	----	----	----	----	----	----	----	----	----	----	----	0.567016	0.536481	----	----
MCU	2	----	----	----	----	----	----	----	----	----	----	----	----	----	----	----	0.50645	0.57309	----	----
MEFV	2	----	----	----	----	----	----	----	----	----	----	----	----	----	----	----	0.538946	0.570482	----	----
MEGF9	2	----	----	----	----	----	----	----	----	----	----	----	----	----	----	----	0.570866	0.671269	----	----
MICU1	2	----	----	----	----	----	----	----	----	----	----	----	----	----	----	----	0.598234	0.664313	----	----
MS4A14	2	----	----	----	----	----	----	----	----	----	----	----	----	----	----	----	0.545004	0.562296	----	----
MS4A7	2	----	----	----	----	----	----	----	----	----	----	----	----	----	----	----	0.523785	0.567872	----	----
MTF1	2	----	----	----	----	----	----	----	----	----	----	----	----	----	----	----	0.577231	0.634672	----	----
MYO1F	2	----	----	----	----	----	----	----	----	----	----	----	----	----	----	----	0.584421	0.603191	----	----
NADK	2	----	----	----	----	----	----	----	----	----	----	----	----	----	----	----	0.523655	0.50191	----	----
NAGA	2	----	----	----	----	----	----	----	----	----	----	----	----	----	----	----	0.506712	0.513068	----	----
NAIP	2	----	----	----	----	----	----	----	----	----	----	----	----	----	----	----	0.555813	0.597034	----	----
NCF2	2	----	----	----	----	----	----	----	----	----	----	----	----	----	----	----	0.596564	0.650012	----	----
NEDD9	2	----	----	----	----	----	----	----	----	----	----	----	----	----	----	----	0.571037	0.569197	----	----
NFAM1	2	----	----	----	----	----	----	----	----	----	----	----	----	----	----	----	0.539778	0.556767	----	----
NHS	2	----	----	----	----	----	----	----	----	----	----	----	----	----	----	----	0.505926	0.570951	----	----
NLRC4	2	----	----	----	----	----	----	----	----	----	----	----	----	----	----	----	0.599268	0.690237	----	----
NLRP12	2	----	----	----	----	----	----	----	----	----	----	----	----	----	----	----	0.590646	0.625799	----	----
OSTF1	2	----	----	----	----	----	----	----	----	----	----	----	----	----	----	----	0.532815	0.652535	----	----
PADI2	2	----	----	----	----	----	----	----	----	----	----	----	----	----	----	----	0.574901	0.611801	----	----
PFKFB4	2	----	----	----	----	----	----	----	----	----	----	----	----	----	----	----	0.519299	0.570003	----	----
PNPLA1	2	----	----	----	----	----	----	----	----	----	----	----	----	----	----	----	0.586049	0.629396	----	----
PSAP	2	----	----	----	----	----	----	----	----	----	----	----	----	----	----	----	0.580767	0.598894	----	----
PTAFR	2	----	----	----	----	----	----	----	----	----	----	----	----	----	----	----	0.556249	0.609851	----	----
PTPRJ	2	----	----	----	----	----	----	----	----	----	----	----	----	----	----	----	0.551509	0.590123	----	----
RAB31	2	----	----	----	----	----	----	----	----	----	----	----	----	----	----	----	0.514454	0.602074	----	----
RAB39A	2	----	----	----	----	----	----	----	----	----	----	----	----	----	----	----	0.511414	0.502617	----	----
RASSF4	2	----	----	----	----	----	----	----	----	----	----	----	----	----	----	----	0.561671	0.582353	----	----
RBM47	2	----	----	----	----	----	----	----	----	----	----	----	----	----	----	----	0.572127	0.645862	----	----
RCN3	2	----	----	----	----	----	----	----	----	----	----	----	----	----	----	----	0.513671	0.507538	----	----
RHOU	2	----	----	----	----	----	----	----	----	----	----	----	----	----	----	----	0.513675	0.584487	----	----
RP4-576H24.4	2	----	----	----	----	----	----	----	----	----	----	----	----	----	----	----	0.614373	0.661265	----	----
S100A8	2	----	----	----	----	----	----	----	----	----	----	----	----	----	----	----	0.518642	0.602665	----	----
S100A9	2	----	----	----	----	----	----	----	----	----	----	----	----	----	----	----	0.524228	0.599609	----	----
S1PR3	2	----	----	----	----	----	----	----	----	----	----	----	----	----	----	----	0.561458	0.637635	----	----
SERPINB2	2	----	----	----	----	----	----	----	----	----	----	----	----	----	----	----	0.522929	0.572684	----	----
SIGLEC14	2	----	----	----	----	----	----	----	----	----	----	----	----	----	----	----	0.543317	0.558473	----	----
SIGLEC9	2	----	----	----	----	----	----	----	----	----	----	----	----	----	----	----	0.546663	0.569375	----	----
SIRPA	2	----	----	----	----	----	----	----	----	----	----	----	----	----	----	----	0.533566	0.562871	----	----
SIRPB1	2	----	----	----	----	----	----	----	----	----	----	----	----	----	----	----	0.641144	0.698942	----	----
SIRPD	2	----	----	----	----	----	----	----	----	----	----	----	----	----	----	----	0.616629	0.639731	----	----
SLC11A1	2	----	----	----	----	----	----	----	----	----	----	----	----	----	----	----	0.518758	0.555063	----	----
SLC16A3	2	----	----	----	----	----	----	----	----	----	----	----	----	----	----	----	0.568746	0.593557	----	----
SLC37A2	2	----	----	----	----	----	----	----	----	----	----	----	----	----	----	----	0.527774	0.542441	----	----
SLC8A1	2	----	----	----	----	----	----	----	----	----	----	----	----	----	----	----	0.504745	0.524869	----	----
SNX18	2	----	----	----	----	----	----	----	----	----	----	----	----	----	----	----	0.504822	0.501633	----	----
SNX27	2	----	----	----	----	----	----	----	----	----	----	----	----	----	----	----	0.577036	0.577026	----	----
SRGAP2B	2	----	----	----	----	----	----	----	----	----	----	----	----	----	----	----	0.546192	0.621736	----	----
STX11	2	----	----	----	----	----	----	----	----	----	----	----	----	----	----	----	0.518272	0.585097	----	----
TADA2B	2	----	----	----	----	----	----	----	----	----	----	----	----	----	----	----	0.55881	0.5597	----	----
THEMIS2	2	----	----	----	----	----	----	----	----	----	----	----	----	----	----	----	0.512976	0.531042	----	----
TLR4	2	----	----	----	----	----	----	----	----	----	----	----	----	----	----	----	0.554412	0.640046	----	----
TLR5	2	----	----	----	----	----	----	----	----	----	----	----	----	----	----	----	0.522915	0.568946	----	----
TLR8	2	----	----	----	----	----	----	----	----	----	----	----	----	----	----	----	0.527173	0.598114	----	----
TMEM154	2	----	----	----	----	----	----	----	----	----	----	----	----	----	----	----	0.547792	0.586967	----	----
TMEM170B	2	----	----	----	----	----	----	----	----	----	----	----	----	----	----	----	0.533186	0.589575	----	----
TNFRSF1B	2	----	----	----	----	----	----	----	----	----	----	----	----	----	----	----	0.523722	0.526084	----	----
TNFSF10	2	----	----	----	----	----	----	----	----	----	----	----	----	----	----	----	0.522849	0.571763	----	----
TSPAN14	2	----	----	----	----	----	----	----	----	----	----	----	----	----	----	----	0.548001	0.533535	----	----
UNC5A	2	----	----	----	----	----	----	----	----	----	----	----	----	----	----	----	0.566868	0.626845	----	----
VDR	2	----	----	----	----	----	----	----	----	----	----	----	----	----	----	----	0.509608	0.575323	----	----
VNN2	2	----	----	----	----	----	----	----	----	----	----	----	----	----	----	----	0.556735	0.590435	----	----
VNN3	2	----	----	----	----	----	----	----	----	----	----	----	----	----	----	----	0.55775	0.593079	----	----
WDFY1	2	----	----	----	----	----	----	----	----	----	----	----	----	----	----	----	0.528281	0.585399	----	----
ZBTB7B	2	----	----	----	----	----	----	----	----	----	----	----	----	----	----	----	0.558925	0.570588	----	----
ZNF438	2	----	----	----	----	----	----	----	----	----	----	----	----	----	----	----	0.521269	0.54987	----	----
SCPEP1	1	----	----	----	----	----	----	----	----	----	----	----	----	----	----	----	----	0.560922	----	----
FAM107B	1	----	----	----	----	----	----	----	----	----	----	----	----	----	----	----	----	0.5247	----	----
CTSZ	1	----	----	----	----	----	----	----	----	----	----	----	----	----	----	----	----	0.508832	----	----
FCER1G	1	----	----	----	----	----	----	----	----	----	----	----	----	----	----	----	----	0.529635	----	----
IL17RA	1	----	----	----	----	----	----	----	----	----	----	----	----	----	----	----	----	0.502713	----	----
APLP2	1	----	----	----	----	----	----	----	----	----	----	----	----	----	----	----	----	0.523618	----	----
MS4A6A	1	----	----	----	----	----	----	----	----	----	----	----	----	----	----	----	----	0.506609	----	----
SRGAP2	1	----	----	----	----	----	----	----	----	----	----	----	----	----	----	----	----	0.513711	----	----
SRGAP2C	1	----	----	----	----	----	----	----	----	----	----	----	----	----	----	----	----	0.534093	----	----
C1orf162	1	----	----	----	----	----	----	----	----	----	----	----	----	----	----	----	----	0.500909	----	----
HEXB	1	----	----	----	----	----	----	----	----	----	----	----	----	----	----	----	----	0.517032	----	----
LGALS3	1	----	----	----	----	----	----	----	----	----	----	----	----	----	----	----	----	0.502237	----	----
PPFIA3	1	----	----	0.503384	----	----	----	----	----	----	----	----	----	----	----	----	----	----	----	----
ACYP2	1	----	----	----	0.536609	----	----	----	----	----	----	----	----	----	----	----	----	----	----	----
ALDH5A1	1	----	----	----	0.537684	----	----	----	----	----	----	----	----	----	----	----	----	----	----	----
ATP5S	1	----	----	----	0.502231	----	----	----	----	----	----	----	----	----	----	----	----	----	----	----
BCKDHB	1	----	----	----	0.56309	----	----	----	----	----	----	----	----	----	----	----	----	----	----	----
C17orf78	1	----	----	----	0.611644	----	----	----	----	----	----	----	----	----	----	----	----	----	----	----
C1QTNF3	1	----	----	----	0.581834	----	----	----	----	----	----	----	----	----	----	----	----	----	----	----
C8orf44	1	----	----	----	0.501306	----	----	----	----	----	----	----	----	----	----	----	----	----	----	----
CAPS2	1	----	----	----	0.553875	----	----	----	----	----	----	----	----	----	----	----	----	----	----	----
CASD1	1	----	----	----	0.53915	----	----	----	----	----	----	----	----	----	----	----	----	----	----	----
CBX5	1	----	----	----	0.50595	----	----	----	----	----	----	----	----	----	----	----	----	----	----	----
CCDC125	1	----	----	----	0.544687	----	----	----	----	----	----	----	----	----	----	----	----	----	----	----
CCDC41	1	----	----	----	0.552303	----	----	----	----	----	----	----	----	----	----	----	----	----	----	----
CDK13	1	----	----	----	0.513726	----	----	----	----	----	----	----	----	----	----	----	----	----	----	----
CDK6	1	----	----	----	0.509518	----	----	----	----	----	----	----	----	----	----	----	----	----	----	----
CEP192	1	----	----	----	0.517986	----	----	----	----	----	----	----	----	----	----	----	----	----	----	----
CEP290	1	----	----	----	0.502459	----	----	----	----	----	----	----	----	----	----	----	----	----	----	----
CFAP70	1	----	----	----	0.572179	----	----	----	----	----	----	----	----	----	----	----	----	----	----	----
CNOT4	1	----	----	----	0.507388	----	----	----	----	----	----	----	----	----	----	----	----	----	----	----
COX20	1	----	----	----	0.50015	----	----	----	----	----	----	----	----	----	----	----	----	----	----	----
CPSF6	1	----	----	----	0.516973	----	----	----	----	----	----	----	----	----	----	----	----	----	----	----
DCAF17	1	----	----	----	0.521985	----	----	----	----	----	----	----	----	----	----	----	----	----	----	----
DHX36	1	----	----	----	0.516105	----	----	----	----	----	----	----	----	----	----	----	----	----	----	----
DZIP3	1	----	----	----	0.522738	----	----	----	----	----	----	----	----	----	----	----	----	----	----	----
ELMO1	1	----	----	----	0.516492	----	----	----	----	----	----	----	----	----	----	----	----	----	----	----
ELP2	1	----	----	----	0.555884	----	----	----	----	----	----	----	----	----	----	----	----	----	----	----
FAM120C	1	----	----	----	0.553559	----	----	----	----	----	----	----	----	----	----	----	----	----	----	----
FAM185A	1	----	----	----	0.544171	----	----	----	----	----	----	----	----	----	----	----	----	----	----	----
FAM227B	1	----	----	----	0.501696	----	----	----	----	----	----	----	----	----	----	----	----	----	----	----
FBXL13	1	----	----	----	0.568092	----	----	----	----	----	----	----	----	----	----	----	----	----	----	----
FKTN	1	----	----	----	0.535781	----	----	----	----	----	----	----	----	----	----	----	----	----	----	----
GOLGB1	1	----	----	----	0.545499	----	----	----	----	----	----	----	----	----	----	----	----	----	----	----
GUCY1A3	1	----	----	----	0.50309	----	----	----	----	----	----	----	----	----	----	----	----	----	----	----
IQCB1	1	----	----	----	0.511426	----	----	----	----	----	----	----	----	----	----	----	----	----	----	----
ITPR2	1	----	----	----	0.52853	----	----	----	----	----	----	----	----	----	----	----	----	----	----	----
KIAA1586	1	----	----	----	0.500481	----	----	----	----	----	----	----	----	----	----	----	----	----	----	----
KIF27	1	----	----	----	0.545645	----	----	----	----	----	----	----	----	----	----	----	----	----	----	----
KLHDC1	1	----	----	----	0.509138	----	----	----	----	----	----	----	----	----	----	----	----	----	----	----
KRIT1	1	----	----	----	0.533918	----	----	----	----	----	----	----	----	----	----	----	----	----	----	----
LACE1	1	----	----	----	0.540776	----	----	----	----	----	----	----	----	----	----	----	----	----	----	----
LHX4	1	----	----	----	0.507017	----	----	----	----	----	----	----	----	----	----	----	----	----	----	----
LRRC37B	1	----	----	----	0.515159	----	----	----	----	----	----	----	----	----	----	----	----	----	----	----
MAPKAPK5	1	----	----	----	0.523852	----	----	----	----	----	----	----	----	----	----	----	----	----	----	----
MBLAC2	1	----	----	----	0.530407	----	----	----	----	----	----	----	----	----	----	----	----	----	----	----
MDM4	1	----	----	----	0.505626	----	----	----	----	----	----	----	----	----	----	----	----	----	----	----
MED21	1	----	----	----	0.603413	----	----	----	----	----	----	----	----	----	----	----	----	----	----	----
METTL15	1	----	----	----	0.521778	----	----	----	----	----	----	----	----	----	----	----	----	----	----	----
MPHOSPH9	1	----	----	----	0.530253	----	----	----	----	----	----	----	----	----	----	----	----	----	----	----
MROH8	1	----	----	----	0.51456	----	----	----	----	----	----	----	----	----	----	----	----	----	----	----
MYRIP	1	----	----	----	0.594282	----	----	----	----	----	----	----	----	----	----	----	----	----	----	----
NAPEPLD	1	----	----	----	0.574635	----	----	----	----	----	----	----	----	----	----	----	----	----	----	----
NEMP2	1	----	----	----	0.502475	----	----	----	----	----	----	----	----	----	----	----	----	----	----	----
PEX26	1	----	----	----	0.5104	----	----	----	----	----	----	----	----	----	----	----	----	----	----	----
PHGR1	1	----	----	----	0.583702	----	----	----	----	----	----	----	----	----	----	----	----	----	----	----
PIK3C3	1	----	----	----	0.524919	----	----	----	----	----	----	----	----	----	----	----	----	----	----	----
PPIP5K2	1	----	----	----	0.504763	----	----	----	----	----	----	----	----	----	----	----	----	----	----	----
PRH1	1	----	----	----	0.524695	----	----	----	----	----	----	----	----	----	----	----	----	----	----	----
PRH2	1	----	----	----	0.575708	----	----	----	----	----	----	----	----	----	----	----	----	----	----	----
PRR4	1	----	----	----	0.523747	----	----	----	----	----	----	----	----	----	----	----	----	----	----	----
RGS17	1	----	----	----	0.540161	----	----	----	----	----	----	----	----	----	----	----	----	----	----	----
RNF144A	1	----	----	----	0.546541	----	----	----	----	----	----	----	----	----	----	----	----	----	----	----
RP11-544M22.13	1	----	----	----	0.519758	----	----	----	----	----	----	----	----	----	----	----	----	----	----	----
SETD2	1	----	----	----	0.502097	----	----	----	----	----	----	----	----	----	----	----	----	----	----	----
SETD6	1	----	----	----	0.503889	----	----	----	----	----	----	----	----	----	----	----	----	----	----	----
SETDB2	1	----	----	----	0.510431	----	----	----	----	----	----	----	----	----	----	----	----	----	----	----
SIRT5	1	----	----	----	0.542885	----	----	----	----	----	----	----	----	----	----	----	----	----	----	----
SLC35F5	1	----	----	----	0.513035	----	----	----	----	----	----	----	----	----	----	----	----	----	----	----
SMAD4	1	----	----	----	0.543341	----	----	----	----	----	----	----	----	----	----	----	----	----	----	----
SPDYE3	1	----	----	----	0.619253	----	----	----	----	----	----	----	----	----	----	----	----	----	----	----
SPICE1	1	----	----	----	0.558425	----	----	----	----	----	----	----	----	----	----	----	----	----	----	----
TARBP1	1	----	----	----	0.526224	----	----	----	----	----	----	----	----	----	----	----	----	----	----	----
TAS2R10	1	----	----	----	0.521433	----	----	----	----	----	----	----	----	----	----	----	----	----	----	----
TAS2R14	1	----	----	----	0.512182	----	----	----	----	----	----	----	----	----	----	----	----	----	----	----
TAS2R4	1	----	----	----	0.522834	----	----	----	----	----	----	----	----	----	----	----	----	----	----	----
TAS2R50	1	----	----	----	0.506905	----	----	----	----	----	----	----	----	----	----	----	----	----	----	----
THOC1	1	----	----	----	0.502423	----	----	----	----	----	----	----	----	----	----	----	----	----	----	----
TIA1	1	----	----	----	0.537107	----	----	----	----	----	----	----	----	----	----	----	----	----	----	----
TMEM161B	1	----	----	----	0.502888	----	----	----	----	----	----	----	----	----	----	----	----	----	----	----
TMEM182	1	----	----	----	0.514141	----	----	----	----	----	----	----	----	----	----	----	----	----	----	----
TMEM220	1	----	----	----	0.564106	----	----	----	----	----	----	----	----	----	----	----	----	----	----	----
UBA5	1	----	----	----	0.512027	----	----	----	----	----	----	----	----	----	----	----	----	----	----	----
UBN2	1	----	----	----	0.550455	----	----	----	----	----	----	----	----	----	----	----	----	----	----	----
ULK4	1	----	----	----	0.513399	----	----	----	----	----	----	----	----	----	----	----	----	----	----	----
WDR5B	1	----	----	----	0.570016	----	----	----	----	----	----	----	----	----	----	----	----	----	----	----
YEATS2	1	----	----	----	0.515056	----	----	----	----	----	----	----	----	----	----	----	----	----	----	----
ZBTB26	1	----	----	----	0.527414	----	----	----	----	----	----	----	----	----	----	----	----	----	----	----
ZCCHC4	1	----	----	----	0.524788	----	----	----	----	----	----	----	----	----	----	----	----	----	----	----
ZCCHC7	1	----	----	----	0.521179	----	----	----	----	----	----	----	----	----	----	----	----	----	----	----
ZDHHC21	1	----	----	----	0.510365	----	----	----	----	----	----	----	----	----	----	----	----	----	----	----
ZKSCAN4	1	----	----	----	0.533855	----	----	----	----	----	----	----	----	----	----	----	----	----	----	----
ZMAT1	1	----	----	----	0.512684	----	----	----	----	----	----	----	----	----	----	----	----	----	----	----
ZNF140	1	----	----	----	0.523725	----	----	----	----	----	----	----	----	----	----	----	----	----	----	----
ZNF236	1	----	----	----	0.514959	----	----	----	----	----	----	----	----	----	----	----	----	----	----	----
ZNF26	1	----	----	----	0.509164	----	----	----	----	----	----	----	----	----	----	----	----	----	----	----
ZNF490	1	----	----	----	0.501084	----	----	----	----	----	----	----	----	----	----	----	----	----	----	----
ZNF621	1	----	----	----	0.523916	----	----	----	----	----	----	----	----	----	----	----	----	----	----	----
ZNF736	1	----	----	----	0.517013	----	----	----	----	----	----	----	----	----	----	----	----	----	----	----
CXCR6	1	----	----	----	----	----	----	----	0.519971	----	----	----	----	----	----	----	----	----	----	----
SUMO4	1	----	----	----	----	----	----	----	0.52986	----	----	----	----	----	----	----	----	----	----	----
HIST1H1T	1	----	----	----	----	----	----	----	----	0.531459	----	----	----	----	----	----	----	----	----	----
HIST1H2AC	1	----	----	----	----	----	----	----	----	0.605592	----	----	----	----	----	----	----	----	----	----
HIST1H2AD	1	----	----	----	----	----	----	----	----	0.525409	----	----	----	----	----	----	----	----	----	----
HIST1H2AG	1	----	----	----	----	----	----	----	----	0.632718	----	----	----	----	----	----	----	----	----	----
HIST1H2AI	1	----	----	----	----	----	----	----	----	0.613725	----	----	----	----	----	----	----	----	----	----
HIST1H2BD	1	----	----	----	----	----	----	----	----	0.520914	----	----	----	----	----	----	----	----	----	----
HIST1H2BF	1	----	----	----	----	----	----	----	----	0.516091	----	----	----	----	----	----	----	----	----	----
HIST1H2BJ	1	----	----	----	----	----	----	----	----	0.598312	----	----	----	----	----	----	----	----	----	----
HIST1H2BK	1	----	----	----	----	----	----	----	----	0.628641	----	----	----	----	----	----	----	----	----	----
HIST1H2BN	1	----	----	----	----	----	----	----	----	0.632327	----	----	----	----	----	----	----	----	----	----
HIST1H2BO	1	----	----	----	----	----	----	----	----	0.597317	----	----	----	----	----	----	----	----	----	----
HIST1H3D	1	----	----	----	----	----	----	----	----	0.522115	----	----	----	----	----	----	----	----	----	----
HIST1H3H	1	----	----	----	----	----	----	----	----	0.636088	----	----	----	----	----	----	----	----	----	----
HIST1H4D	1	----	----	----	----	----	----	----	----	0.57057	----	----	----	----	----	----	----	----	----	----
HIST1H4H	1	----	----	----	----	----	----	----	----	0.622359	----	----	----	----	----	----	----	----	----	----
HIST1H4I	1	----	----	----	----	----	----	----	----	0.614119	----	----	----	----	----	----	----	----	----	----
HIST2H2BF	1	----	----	----	----	----	----	----	----	0.527664	----	----	----	----	----	----	----	----	----	----
C2orf44	1	----	----	----	----	----	----	----	----	----	0.541535	----	----	----	----	----	----	----	----	----
KLHL9	1	----	----	----	----	----	----	----	----	----	0.522972	----	----	----	----	----	----	----	----	----
LRTOMT	1	----	----	----	----	----	----	----	----	----	0.525836	----	----	----	----	----	----	----	----	----
PEX11A	1	----	----	----	----	----	----	----	----	----	0.524753	----	----	----	----	----	----	----	----	----
ZNF30	1	----	----	----	----	----	----	----	----	----	0.506831	----	----	----	----	----	----	----	----	----
ZSCAN26	1	----	----	----	----	----	----	----	----	----	0.503502	----	----	----	----	----	----	----	----	----
CASP6	1	----	----	----	----	----	----	----	----	----	----	0.534681	----	----	----	----	----	----	----	----
CDADC1	1	----	----	----	----	----	----	----	----	----	----	0.505057	----	----	----	----	----	----	----	----
CLUAP1	1	----	----	----	----	----	----	----	----	----	----	0.521756	----	----	----	----	----	----	----	----
COX11	1	----	----	----	----	----	----	----	----	----	----	0.502694	----	----	----	----	----	----	----	----
FAM227A	1	----	----	----	----	----	----	----	----	----	----	0.527349	----	----	----	----	----	----	----	----
GTDC1	1	----	----	----	----	----	----	----	----	----	----	0.513274	----	----	----	----	----	----	----	----
HNRNPA1L2	1	----	----	----	----	----	----	----	----	----	----	0.537217	----	----	----	----	----	----	----	----
INHBC	1	----	----	----	----	----	----	----	----	----	----	0.524634	----	----	----	----	----	----	----	----
KDM5B	1	----	----	----	----	----	----	----	----	----	----	0.5034	----	----	----	----	----	----	----	----
MLC1	1	----	----	----	----	----	----	----	----	----	----	0.509479	----	----	----	----	----	----	----	----
MORN3	1	----	----	----	----	----	----	----	----	----	----	0.511046	----	----	----	----	----	----	----	----
MYCN	1	----	----	----	----	----	----	----	----	----	----	0.547963	----	----	----	----	----	----	----	----
NME7	1	----	----	----	----	----	----	----	----	----	----	0.536256	----	----	----	----	----	----	----	----
ORAI1	1	----	----	----	----	----	----	----	----	----	----	0.507951	----	----	----	----	----	----	----	----
SLX4IP	1	----	----	----	----	----	----	----	----	----	----	0.513926	----	----	----	----	----	----	----	----
SPN	1	----	----	----	----	----	----	----	----	----	----	0.528045	----	----	----	----	----	----	----	----
WT1	1	----	----	----	----	----	----	----	----	----	----	0.553504	----	----	----	----	----	----	----	----
ZBED4	1	----	----	----	----	----	----	----	----	----	----	0.51639	----	----	----	----	----	----	----	----
ZDHHC9	1	----	----	----	----	----	----	----	----	----	----	0.537385	----	----	----	----	----	----	----	----
CCDC102A	1	----	----	----	----	----	----	----	----	----	----	----	0.506246	----	----	----	----	----	----	----
EIF2AK2	1	----	----	----	----	----	----	----	----	----	----	----	0.515555	----	----	----	----	----	----	----
GRAMD1C	1	----	----	----	----	----	----	----	----	----	----	----	0.508493	----	----	----	----	----	----	----
MED12L	1	----	----	----	----	----	----	----	----	----	----	----	0.522186	----	----	----	----	----	----	----
PRKAB2	1	----	----	----	----	----	----	----	----	----	----	----	0.530961	----	----	----	----	----	----	----
RGP1	1	----	----	----	----	----	----	----	----	----	----	----	0.520762	----	----	----	----	----	----	----
SEC24B	1	----	----	----	----	----	----	----	----	----	----	----	0.501058	----	----	----	----	----	----	----
TRAF6	1	----	----	----	----	----	----	----	----	----	----	----	0.506116	----	----	----	----	----	----	----
TRIM58	1	----	----	----	----	----	----	----	----	----	----	----	0.527957	----	----	----	----	----	----	----
ADPRM	1	----	----	----	----	----	----	----	----	----	----	----	----	0.519849	----	----	----	----	----	----
CHIC1	1	----	----	----	----	----	----	----	----	----	----	----	----	0.517171	----	----	----	----	----	----
CNST	1	----	----	----	----	----	----	----	----	----	----	----	----	0.509264	----	----	----	----	----	----
DIEXF	1	----	----	----	----	----	----	----	----	----	----	----	----	0.505603	----	----	----	----	----	----
GATAD2B	1	----	----	----	----	----	----	----	----	----	----	----	----	0.500027	----	----	----	----	----	----
KLHL28	1	----	----	----	----	----	----	----	----	----	----	----	----	0.526849	----	----	----	----	----	----
LEMD3	1	----	----	----	----	----	----	----	----	----	----	----	----	0.506881	----	----	----	----	----	----
MICU3	1	----	----	----	----	----	----	----	----	----	----	----	----	0.525275	----	----	----	----	----	----
NAA30	1	----	----	----	----	----	----	----	----	----	----	----	----	0.504194	----	----	----	----	----	----
PCMTD1	1	----	----	----	----	----	----	----	----	----	----	----	----	0.504283	----	----	----	----	----	----
RSBN1	1	----	----	----	----	----	----	----	----	----	----	----	----	0.510425	----	----	----	----	----	----
RYK	1	----	----	----	----	----	----	----	----	----	----	----	----	0.504468	----	----	----	----	----	----
SLC16A7	1	----	----	----	----	----	----	----	----	----	----	----	----	0.505193	----	----	----	----	----	----
XRN1	1	----	----	----	----	----	----	----	----	----	----	----	----	0.516618	----	----	----	----	----	----
ZNF264	1	----	----	----	----	----	----	----	----	----	----	----	----	0.525248	----	----	----	----	----	----
AC004076.9	1	----	----	----	----	----	----	----	----	----	----	----	----	----	0.525782	----	----	----	----	----
ADNP	1	----	----	----	----	----	----	----	----	----	----	----	----	----	0.521161	----	----	----	----	----
AK9	1	----	----	----	----	----	----	----	----	----	----	----	----	----	0.512259	----	----	----	----	----
ALG1L2	1	----	----	----	----	----	----	----	----	----	----	----	----	----	0.52862	----	----	----	----	----
ANKRD31	1	----	----	----	----	----	----	----	----	----	----	----	----	----	0.501812	----	----	----	----	----
BBIP1	1	----	----	----	----	----	----	----	----	----	----	----	----	----	0.516204	----	----	----	----	----
BBS1	1	----	----	----	----	----	----	----	----	----	----	----	----	----	0.544231	----	----	----	----	----
C9orf84	1	----	----	----	----	----	----	----	----	----	----	----	----	----	0.519662	----	----	----	----	----
CAPN14	1	----	----	----	----	----	----	----	----	----	----	----	----	----	0.524744	----	----	----	----	----
CRAMP1	1	----	----	----	----	----	----	----	----	----	----	----	----	----	0.518271	----	----	----	----	----
CYP2D6	1	----	----	----	----	----	----	----	----	----	----	----	----	----	0.520129	----	----	----	----	----
DNASE1	1	----	----	----	----	----	----	----	----	----	----	----	----	----	0.523796	----	----	----	----	----
ERBB2	1	----	----	----	----	----	----	----	----	----	----	----	----	----	0.524692	----	----	----	----	----
GCM2	1	----	----	----	----	----	----	----	----	----	----	----	----	----	0.546159	----	----	----	----	----
GON4L	1	----	----	----	----	----	----	----	----	----	----	----	----	----	0.562318	----	----	----	----	----
GRIFIN	1	----	----	----	----	----	----	----	----	----	----	----	----	----	0.518869	----	----	----	----	----
GSE1	1	----	----	----	----	----	----	----	----	----	----	----	----	----	0.507797	----	----	----	----	----
GUCA1B	1	----	----	----	----	----	----	----	----	----	----	----	----	----	0.532611	----	----	----	----	----
HPS4	1	----	----	----	----	----	----	----	----	----	----	----	----	----	0.507682	----	----	----	----	----
ITFG2	1	----	----	----	----	----	----	----	----	----	----	----	----	----	0.503872	----	----	----	----	----
ITIH2	1	----	----	----	----	----	----	----	----	----	----	----	----	----	0.524054	----	----	----	----	----
JPH3	1	----	----	----	----	----	----	----	----	----	----	----	----	----	0.539373	----	----	----	----	----
KIAA2026	1	----	----	----	----	----	----	----	----	----	----	----	----	----	0.537358	----	----	----	----	----
KMT5B	1	----	----	----	----	----	----	----	----	----	----	----	----	----	0.512903	----	----	----	----	----
KNG1	1	----	----	----	----	----	----	----	----	----	----	----	----	----	0.511453	----	----	----	----	----
LIPH	1	----	----	----	----	----	----	----	----	----	----	----	----	----	0.56434	----	----	----	----	----
LMO7	1	----	----	----	----	----	----	----	----	----	----	----	----	----	0.543039	----	----	----	----	----
LRRC46	1	----	----	----	----	----	----	----	----	----	----	----	----	----	0.501753	----	----	----	----	----
MED13	1	----	----	----	----	----	----	----	----	----	----	----	----	----	0.501401	----	----	----	----	----
METTL22	1	----	----	----	----	----	----	----	----	----	----	----	----	----	0.513691	----	----	----	----	----
MFSD4B	1	----	----	----	----	----	----	----	----	----	----	----	----	----	0.501147	----	----	----	----	----
MTERF4	1	----	----	----	----	----	----	----	----	----	----	----	----	----	0.504144	----	----	----	----	----
MYOM1	1	----	----	----	----	----	----	----	----	----	----	----	----	----	0.538773	----	----	----	----	----
NBAS	1	----	----	----	----	----	----	----	----	----	----	----	----	----	0.506225	----	----	----	----	----
NEU3	1	----	----	----	----	----	----	----	----	----	----	----	----	----	0.51228	----	----	----	----	----
NFX1	1	----	----	----	----	----	----	----	----	----	----	----	----	----	0.506922	----	----	----	----	----
NFYA	1	----	----	----	----	----	----	----	----	----	----	----	----	----	0.524559	----	----	----	----	----
NLGN3	1	----	----	----	----	----	----	----	----	----	----	----	----	----	0.526563	----	----	----	----	----
PIGG	1	----	----	----	----	----	----	----	----	----	----	----	----	----	0.520582	----	----	----	----	----
PLCD4	1	----	----	----	----	----	----	----	----	----	----	----	----	----	0.506626	----	----	----	----	----
RP11-795F19.5	1	----	----	----	----	----	----	----	----	----	----	----	----	----	0.509784	----	----	----	----	----
RP11-894J14.5	1	----	----	----	----	----	----	----	----	----	----	----	----	----	0.501819	----	----	----	----	----
SEMA4G	1	----	----	----	----	----	----	----	----	----	----	----	----	----	0.531098	----	----	----	----	----
SIRT4	1	----	----	----	----	----	----	----	----	----	----	----	----	----	0.503764	----	----	----	----	----
SMG6	1	----	----	----	----	----	----	----	----	----	----	----	----	----	0.514946	----	----	----	----	----
SYNRG	1	----	----	----	----	----	----	----	----	----	----	----	----	----	0.546267	----	----	----	----	----
THOC5	1	----	----	----	----	----	----	----	----	----	----	----	----	----	0.531269	----	----	----	----	----
TNXB	1	----	----	----	----	----	----	----	----	----	----	----	----	----	0.515922	----	----	----	----	----
TPH1	1	----	----	----	----	----	----	----	----	----	----	----	----	----	0.534517	----	----	----	----	----
TRIM5	1	----	----	----	----	----	----	----	----	----	----	----	----	----	0.573343	----	----	----	----	----
TRMT10B	1	----	----	----	----	----	----	----	----	----	----	----	----	----	0.518777	----	----	----	----	----
TSSK3	1	----	----	----	----	----	----	----	----	----	----	----	----	----	0.520042	----	----	----	----	----
TSSK4	1	----	----	----	----	----	----	----	----	----	----	----	----	----	0.530066	----	----	----	----	----
WDR48	1	----	----	----	----	----	----	----	----	----	----	----	----	----	0.512642	----	----	----	----	----
WNT8B	1	----	----	----	----	----	----	----	----	----	----	----	----	----	0.502412	----	----	----	----	----
ZMYM5	1	----	----	----	----	----	----	----	----	----	----	----	----	----	0.517264	----	----	----	----	----
ZNF155	1	----	----	----	----	----	----	----	----	----	----	----	----	----	0.552011	----	----	----	----	----
ZNF160	1	----	----	----	----	----	----	----	----	----	----	----	----	----	0.53373	----	----	----	----	----
ZNF346	1	----	----	----	----	----	----	----	----	----	----	----	----	----	0.509861	----	----	----	----	----
ZNF420	1	----	----	----	----	----	----	----	----	----	----	----	----	----	0.504441	----	----	----	----	----
ZNF491	1	----	----	----	----	----	----	----	----	----	----	----	----	----	0.503541	----	----	----	----	----
ZNF547	1	----	----	----	----	----	----	----	----	----	----	----	----	----	0.515789	----	----	----	----	----
ZNF616	1	----	----	----	----	----	----	----	----	----	----	----	----	----	0.500826	----	----	----	----	----
ZNF627	1	----	----	----	----	----	----	----	----	----	----	----	----	----	0.557665	----	----	----	----	----
ADAMTS16	1	----	----	----	----	----	----	----	----	----	----	----	----	----	----	0.519922	----	----	----	----
AKAP11	1	----	----	----	----	----	----	----	----	----	----	----	----	----	----	0.513527	----	----	----	----
ALG9	1	----	----	----	----	----	----	----	----	----	----	----	----	----	----	0.509439	----	----	----	----
ATRX	1	----	----	----	----	----	----	----	----	----	----	----	----	----	----	0.500809	----	----	----	----
BCAS4	1	----	----	----	----	----	----	----	----	----	----	----	----	----	----	0.50321	----	----	----	----
C2CD3	1	----	----	----	----	----	----	----	----	----	----	----	----	----	----	0.522886	----	----	----	----
C2orf16	1	----	----	----	----	----	----	----	----	----	----	----	----	----	----	0.501433	----	----	----	----
CAV3	1	----	----	----	----	----	----	----	----	----	----	----	----	----	----	0.517232	----	----	----	----
CCDC179	1	----	----	----	----	----	----	----	----	----	----	----	----	----	----	0.547456	----	----	----	----
CCNJ	1	----	----	----	----	----	----	----	----	----	----	----	----	----	----	0.511858	----	----	----	----
CFAP46	1	----	----	----	----	----	----	----	----	----	----	----	----	----	----	0.505666	----	----	----	----
CNKSR1	1	----	----	----	----	----	----	----	----	----	----	----	----	----	----	0.503249	----	----	----	----
CNMD	1	----	----	----	----	----	----	----	----	----	----	----	----	----	----	0.525699	----	----	----	----
CTD-2313N18.7	1	----	----	----	----	----	----	----	----	----	----	----	----	----	----	0.558381	----	----	----	----
DISP2	1	----	----	----	----	----	----	----	----	----	----	----	----	----	----	0.517065	----	----	----	----
DNMT3A	1	----	----	----	----	----	----	----	----	----	----	----	----	----	----	0.502747	----	----	----	----
EHBP1	1	----	----	----	----	----	----	----	----	----	----	----	----	----	----	0.531018	----	----	----	----
FANCM	1	----	----	----	----	----	----	----	----	----	----	----	----	----	----	0.508609	----	----	----	----
FIP1L1	1	----	----	----	----	----	----	----	----	----	----	----	----	----	----	0.503604	----	----	----	----
FNDC9	1	----	----	----	----	----	----	----	----	----	----	----	----	----	----	0.524381	----	----	----	----
FOXP1	1	----	----	----	----	----	----	----	----	----	----	----	----	----	----	0.538268	----	----	----	----
GLRA4	1	----	----	----	----	----	----	----	----	----	----	----	----	----	----	0.515252	----	----	----	----
GPR87	1	----	----	----	----	----	----	----	----	----	----	----	----	----	----	0.51289	----	----	----	----
HERC1	1	----	----	----	----	----	----	----	----	----	----	----	----	----	----	0.514869	----	----	----	----
HIF1AN	1	----	----	----	----	----	----	----	----	----	----	----	----	----	----	0.528522	----	----	----	----
IKZF2	1	----	----	----	----	----	----	----	----	----	----	----	----	----	----	0.5145	----	----	----	----
INO80D	1	----	----	----	----	----	----	----	----	----	----	----	----	----	----	0.552283	----	----	----	----
KIAA0586	1	----	----	----	----	----	----	----	----	----	----	----	----	----	----	0.507609	----	----	----	----
KIAA1109	1	----	----	----	----	----	----	----	----	----	----	----	----	----	----	0.551868	----	----	----	----
KIF2A	1	----	----	----	----	----	----	----	----	----	----	----	----	----	----	0.52665	----	----	----	----
MAP4K3	1	----	----	----	----	----	----	----	----	----	----	----	----	----	----	0.504695	----	----	----	----
N4BP2	1	----	----	----	----	----	----	----	----	----	----	----	----	----	----	0.528777	----	----	----	----
NBEA	1	----	----	----	----	----	----	----	----	----	----	----	----	----	----	0.519582	----	----	----	----
NLRC3	1	----	----	----	----	----	----	----	----	----	----	----	----	----	----	0.50504	----	----	----	----
NSD3	1	----	----	----	----	----	----	----	----	----	----	----	----	----	----	0.534716	----	----	----	----
PAXBP1	1	----	----	----	----	----	----	----	----	----	----	----	----	----	----	0.502043	----	----	----	----
PGM2L1	1	----	----	----	----	----	----	----	----	----	----	----	----	----	----	0.502924	----	----	----	----
PHLPP1	1	----	----	----	----	----	----	----	----	----	----	----	----	----	----	0.518512	----	----	----	----
PSMG4	1	----	----	----	----	----	----	----	----	----	----	----	----	----	----	0.501523	----	----	----	----
PUM1	1	----	----	----	----	----	----	----	----	----	----	----	----	----	----	0.52267	----	----	----	----
RHOH	1	----	----	----	----	----	----	----	----	----	----	----	----	----	----	0.502931	----	----	----	----
RIF1	1	----	----	----	----	----	----	----	----	----	----	----	----	----	----	0.506396	----	----	----	----
RP11-505K9.4	1	----	----	----	----	----	----	----	----	----	----	----	----	----	----	0.508846	----	----	----	----
RP11-574F21.3	1	----	----	----	----	----	----	----	----	----	----	----	----	----	----	0.569075	----	----	----	----
RPAP2	1	----	----	----	----	----	----	----	----	----	----	----	----	----	----	0.52146	----	----	----	----
SLFNL1	1	----	----	----	----	----	----	----	----	----	----	----	----	----	----	0.529516	----	----	----	----
SYNE1	1	----	----	----	----	----	----	----	----	----	----	----	----	----	----	0.50518	----	----	----	----
TAS2R46	1	----	----	----	----	----	----	----	----	----	----	----	----	----	----	0.537117	----	----	----	----
TET1	1	----	----	----	----	----	----	----	----	----	----	----	----	----	----	0.504374	----	----	----	----
THADA	1	----	----	----	----	----	----	----	----	----	----	----	----	----	----	0.501541	----	----	----	----
TOX	1	----	----	----	----	----	----	----	----	----	----	----	----	----	----	0.538459	----	----	----	----
TSC1	1	----	----	----	----	----	----	----	----	----	----	----	----	----	----	0.501276	----	----	----	----
TTC21B	1	----	----	----	----	----	----	----	----	----	----	----	----	----	----	0.561087	----	----	----	----
TTC23L	1	----	----	----	----	----	----	----	----	----	----	----	----	----	----	0.561826	----	----	----	----
TYW5	1	----	----	----	----	----	----	----	----	----	----	----	----	----	----	0.524437	----	----	----	----
USP37	1	----	----	----	----	----	----	----	----	----	----	----	----	----	----	0.516943	----	----	----	----
VPS13C	1	----	----	----	----	----	----	----	----	----	----	----	----	----	----	0.546971	----	----	----	----
ZBED6	1	----	----	----	----	----	----	----	----	----	----	----	----	----	----	0.539446	----	----	----	----
ZC3H8	1	----	----	----	----	----	----	----	----	----	----	----	----	----	----	0.540157	----	----	----	----
ZNF121	1	----	----	----	----	----	----	----	----	----	----	----	----	----	----	0.500565	----	----	----	----
ZNF280B	1	----	----	----	----	----	----	----	----	----	----	----	----	----	----	0.510119	----	----	----	----
ZNF280C	1	----	----	----	----	----	----	----	----	----	----	----	----	----	----	0.510157	----	----	----	----
ZNF43	1	----	----	----	----	----	----	----	----	----	----	----	----	----	----	0.51291	----	----	----	----
ZNF569	1	----	----	----	----	----	----	----	----	----	----	----	----	----	----	0.520422	----	----	----	----
ZNF675	1	----	----	----	----	----	----	----	----	----	----	----	----	----	----	0.526267	----	----	----	----
ZNF709	1	----	----	----	----	----	----	----	----	----	----	----	----	----	----	0.517121	----	----	----	----
ZNF726	1	----	----	----	----	----	----	----	----	----	----	----	----	----	----	0.50314	----	----	----	----
ZNF805	1	----	----	----	----	----	----	----	----	----	----	----	----	----	----	0.564472	----	----	----	----
ZNF836	1	----	----	----	----	----	----	----	----	----	----	----	----	----	----	0.504664	----	----	----	----
FCGRT	1	----	----	----	----	----	----	----	----	----	----	----	----	----	----	----	0.514461	----	----	----
HDAC4	1	----	----	----	----	----	----	----	----	----	----	----	----	----	----	----	0.512092	----	----	----
IFI30	1	----	----	----	----	----	----	----	----	----	----	----	----	----	----	----	0.510901	----	----	----
KIAA0513	1	----	----	----	----	----	----	----	----	----	----	----	----	----	----	----	0.504141	----	----	----
PIK3R5	1	----	----	----	----	----	----	----	----	----	----	----	----	----	----	----	0.5039	----	----	----
PRKACA	1	----	----	----	----	----	----	----	----	----	----	----	----	----	----	----	0.506866	----	----	----
RIN2	1	----	----	----	----	----	----	----	----	----	----	----	----	----	----	----	0.522628	----	----	----
RXRA	1	----	----	----	----	----	----	----	----	----	----	----	----	----	----	----	0.501332	----	----	----
SLC22A15	1	----	----	----	----	----	----	----	----	----	----	----	----	----	----	----	0.509	----	----	----
SLC6A12	1	----	----	----	----	----	----	----	----	----	----	----	----	----	----	----	0.500998	----	----	----
TMEM127	1	----	----	----	----	----	----	----	----	----	----	----	----	----	----	----	0.508124	----	----	----
VPS37C	1	----	----	----	----	----	----	----	----	----	----	----	----	----	----	----	0.515956	----	----	----
XKR7	1	----	----	----	----	----	----	----	----	----	----	----	----	----	----	----	0.551769	----	----	----
ACER3	1	----	----	----	----	----	----	----	----	----	----	----	----	----	----	----	----	0.529139	----	----
ACSL1	1	----	----	----	----	----	----	----	----	----	----	----	----	----	----	----	----	0.515861	----	----
ACTR3	1	----	----	----	----	----	----	----	----	----	----	----	----	----	----	----	----	0.584658	----	----
ADAM9	1	----	----	----	----	----	----	----	----	----	----	----	----	----	----	----	----	0.520135	----	----
AGFG1	1	----	----	----	----	----	----	----	----	----	----	----	----	----	----	----	----	0.545478	----	----
AIM1	1	----	----	----	----	----	----	----	----	----	----	----	----	----	----	----	----	0.519042	----	----
AKAP10	1	----	----	----	----	----	----	----	----	----	----	----	----	----	----	----	----	0.532175	----	----
AP1S2	1	----	----	----	----	----	----	----	----	----	----	----	----	----	----	----	----	0.500261	----	----
AQP9	1	----	----	----	----	----	----	----	----	----	----	----	----	----	----	----	----	0.571061	----	----
ARHGAP24	1	----	----	----	----	----	----	----	----	----	----	----	----	----	----	----	----	0.540567	----	----
ARHGAP26	1	----	----	----	----	----	----	----	----	----	----	----	----	----	----	----	----	0.568945	----	----
ASAH1	1	----	----	----	----	----	----	----	----	----	----	----	----	----	----	----	----	0.536833	----	----
ATG3	1	----	----	----	----	----	----	----	----	----	----	----	----	----	----	----	----	0.505818	----	----
ATP6AP2	1	----	----	----	----	----	----	----	----	----	----	----	----	----	----	----	----	0.505379	----	----
BPI	1	----	----	----	----	----	----	----	----	----	----	----	----	----	----	----	----	0.530252	----	----
CAMSAP2	1	----	----	----	----	----	----	----	----	----	----	----	----	----	----	----	----	0.510981	----	----
CAP1	1	----	----	----	----	----	----	----	----	----	----	----	----	----	----	----	----	0.511504	----	----
CD4	1	----	----	----	----	----	----	----	----	----	----	----	----	----	----	----	----	0.505701	----	----
CDC42EP3	1	----	----	----	----	----	----	----	----	----	----	----	----	----	----	----	----	0.56152	----	----
CFLAR	1	----	----	----	----	----	----	----	----	----	----	----	----	----	----	----	----	0.524397	----	----
CHP1	1	----	----	----	----	----	----	----	----	----	----	----	----	----	----	----	----	0.502305	----	----
CHST15	1	----	----	----	----	----	----	----	----	----	----	----	----	----	----	----	----	0.52045	----	----
CKAP4	1	----	----	----	----	----	----	----	----	----	----	----	----	----	----	----	----	0.535953	----	----
CPPED1	1	----	----	----	----	----	----	----	----	----	----	----	----	----	----	----	----	0.557408	----	----
CR1	1	----	----	----	----	----	----	----	----	----	----	----	----	----	----	----	----	0.566185	----	----
CTSS	1	----	----	----	----	----	----	----	----	----	----	----	----	----	----	----	----	0.519509	----	----
DDX60L	1	----	----	----	----	----	----	----	----	----	----	----	----	----	----	----	----	0.562355	----	----
DIRC2	1	----	----	----	----	----	----	----	----	----	----	----	----	----	----	----	----	0.559533	----	----
DOCK10	1	----	----	----	----	----	----	----	----	----	----	----	----	----	----	----	----	0.513769	----	----
EVI2B	1	----	----	----	----	----	----	----	----	----	----	----	----	----	----	----	----	0.536192	----	----
FAM200B	1	----	----	----	----	----	----	----	----	----	----	----	----	----	----	----	----	0.533983	----	----
FAM49B	1	----	----	----	----	----	----	----	----	----	----	----	----	----	----	----	----	0.609849	----	----
FBP1	1	----	----	----	----	----	----	----	----	----	----	----	----	----	----	----	----	0.501198	----	----
FGD4	1	----	----	----	----	----	----	----	----	----	----	----	----	----	----	----	----	0.590602	----	----
FIG4	1	----	----	----	----	----	----	----	----	----	----	----	----	----	----	----	----	0.516967	----	----
FPR1	1	----	----	----	----	----	----	----	----	----	----	----	----	----	----	----	----	0.586739	----	----
FPR2	1	----	----	----	----	----	----	----	----	----	----	----	----	----	----	----	----	0.548007	----	----
FRAT2	1	----	----	----	----	----	----	----	----	----	----	----	----	----	----	----	----	0.520447	----	----
GPCPD1	1	----	----	----	----	----	----	----	----	----	----	----	----	----	----	----	----	0.501983	----	----
GPR65	1	----	----	----	----	----	----	----	----	----	----	----	----	----	----	----	----	0.539906	----	----
GSR	1	----	----	----	----	----	----	----	----	----	----	----	----	----	----	----	----	0.537713	----	----
GUCY2C	1	----	----	----	----	----	----	----	----	----	----	----	----	----	----	----	----	0.576648	----	----
HCLS1	1	----	----	----	----	----	----	----	----	----	----	----	----	----	----	----	----	0.510289	----	----
IFNGR1	1	----	----	----	----	----	----	----	----	----	----	----	----	----	----	----	----	0.562986	----	----
IGSF6	1	----	----	----	----	----	----	----	----	----	----	----	----	----	----	----	----	0.535248	----	----
IL31RA	1	----	----	----	----	----	----	----	----	----	----	----	----	----	----	----	----	0.507698	----	----
IPCEF1	1	----	----	----	----	----	----	----	----	----	----	----	----	----	----	----	----	0.595284	----	----
IQGAP1	1	----	----	----	----	----	----	----	----	----	----	----	----	----	----	----	----	0.521699	----	----
ITGB2	1	----	----	----	----	----	----	----	----	----	----	----	----	----	----	----	----	0.527007	----	----
ITPRIP	1	----	----	----	----	----	----	----	----	----	----	----	----	----	----	----	----	0.515297	----	----
JAK2	1	----	----	----	----	----	----	----	----	----	----	----	----	----	----	----	----	0.53809	----	----
KCNE1B	1	----	----	----	----	----	----	----	----	----	----	----	----	----	----	----	----	0.52911	----	----
KLF4	1	----	----	----	----	----	----	----	----	----	----	----	----	----	----	----	----	0.509086	----	----
LACTB	1	----	----	----	----	----	----	----	----	----	----	----	----	----	----	----	----	0.515716	----	----
LCP1	1	----	----	----	----	----	----	----	----	----	----	----	----	----	----	----	----	0.526909	----	----
LILRA5	1	----	----	----	----	----	----	----	----	----	----	----	----	----	----	----	----	0.532144	----	----
LRP1	1	----	----	----	----	----	----	----	----	----	----	----	----	----	----	----	----	0.53032	----	----
LYST	1	----	----	----	----	----	----	----	----	----	----	----	----	----	----	----	----	0.507922	----	----
MAFB	1	----	----	----	----	----	----	----	----	----	----	----	----	----	----	----	----	0.545063	----	----
MARCO	1	----	----	----	----	----	----	----	----	----	----	----	----	----	----	----	----	0.508845	----	----
MCMBP	1	----	----	----	----	----	----	----	----	----	----	----	----	----	----	----	----	0.527775	----	----
MFSD14B	1	----	----	----	----	----	----	----	----	----	----	----	----	----	----	----	----	0.514137	----	----
MGAM2	1	----	----	----	----	----	----	----	----	----	----	----	----	----	----	----	----	0.556753	----	----
NAMPT	1	----	----	----	----	----	----	----	----	----	----	----	----	----	----	----	----	0.510899	----	----
NCF1	1	----	----	----	----	----	----	----	----	----	----	----	----	----	----	----	----	0.532761	----	----
NOTCH2	1	----	----	----	----	----	----	----	----	----	----	----	----	----	----	----	----	0.50692	----	----
NPTN	1	----	----	----	----	----	----	----	----	----	----	----	----	----	----	----	----	0.559392	----	----
NUMB	1	----	----	----	----	----	----	----	----	----	----	----	----	----	----	----	----	0.501653	----	----
OSBPL11	1	----	----	----	----	----	----	----	----	----	----	----	----	----	----	----	----	0.539533	----	----
P2RY13	1	----	----	----	----	----	----	----	----	----	----	----	----	----	----	----	----	0.561426	----	----
PAK1	1	----	----	----	----	----	----	----	----	----	----	----	----	----	----	----	----	0.500412	----	----
PLBD1	1	----	----	----	----	----	----	----	----	----	----	----	----	----	----	----	----	0.552771	----	----
PPFIBP2	1	----	----	----	----	----	----	----	----	----	----	----	----	----	----	----	----	0.513586	----	----
PPT1	1	----	----	----	----	----	----	----	----	----	----	----	----	----	----	----	----	0.56493	----	----
PRLR	1	----	----	----	----	----	----	----	----	----	----	----	----	----	----	----	----	0.531641	----	----
RASSF2	1	----	----	----	----	----	----	----	----	----	----	----	----	----	----	----	----	0.522183	----	----
RASSF3	1	----	----	----	----	----	----	----	----	----	----	----	----	----	----	----	----	0.510239	----	----
RGS2	1	----	----	----	----	----	----	----	----	----	----	----	----	----	----	----	----	0.512962	----	----
S100A12	1	----	----	----	----	----	----	----	----	----	----	----	----	----	----	----	----	0.520841	----	----
SAMHD1	1	----	----	----	----	----	----	----	----	----	----	----	----	----	----	----	----	0.512535	----	----
SDCBP	1	----	----	----	----	----	----	----	----	----	----	----	----	----	----	----	----	0.55992	----	----
SERPINA1	1	----	----	----	----	----	----	----	----	----	----	----	----	----	----	----	----	0.510591	----	----
SGTB	1	----	----	----	----	----	----	----	----	----	----	----	----	----	----	----	----	0.515611	----	----
SIGLEC10	1	----	----	----	----	----	----	----	----	----	----	----	----	----	----	----	----	0.522377	----	----
SIGLEC7	1	----	----	----	----	----	----	----	----	----	----	----	----	----	----	----	----	0.532625	----	----
SLA	1	----	----	----	----	----	----	----	----	----	----	----	----	----	----	----	----	0.539455	----	----
SLC1A3	1	----	----	----	----	----	----	----	----	----	----	----	----	----	----	----	----	0.537494	----	----
SLC31A2	1	----	----	----	----	----	----	----	----	----	----	----	----	----	----	----	----	0.551565	----	----
SLC46A2	1	----	----	----	----	----	----	----	----	----	----	----	----	----	----	----	----	0.52275	----	----
SLCO4C1	1	----	----	----	----	----	----	----	----	----	----	----	----	----	----	----	----	0.513866	----	----
SNX30	1	----	----	----	----	----	----	----	----	----	----	----	----	----	----	----	----	0.540009	----	----
SOAT1	1	----	----	----	----	----	----	----	----	----	----	----	----	----	----	----	----	0.52446	----	----
STEAP4	1	----	----	----	----	----	----	----	----	----	----	----	----	----	----	----	----	0.500471	----	----
STS	1	----	----	----	----	----	----	----	----	----	----	----	----	----	----	----	----	0.508251	----	----
TBC1D2	1	----	----	----	----	----	----	----	----	----	----	----	----	----	----	----	----	0.508563	----	----
TDRD7	1	----	----	----	----	----	----	----	----	----	----	----	----	----	----	----	----	0.549039	----	----
TET2	1	----	----	----	----	----	----	----	----	----	----	----	----	----	----	----	----	0.544921	----	----
TLDC2	1	----	----	----	----	----	----	----	----	----	----	----	----	----	----	----	----	0.502189	----	----
TLR1	1	----	----	----	----	----	----	----	----	----	----	----	----	----	----	----	----	0.52637	----	----
TLR2	1	----	----	----	----	----	----	----	----	----	----	----	----	----	----	----	----	0.521972	----	----
TRIB1	1	----	----	----	----	----	----	----	----	----	----	----	----	----	----	----	----	0.525997	----	----
TUBA4A	1	----	----	----	----	----	----	----	----	----	----	----	----	----	----	----	----	0.50094	----	----
TXNDC2	1	----	----	----	----	----	----	----	----	----	----	----	----	----	----	----	----	0.504797	----	----
USP3	1	----	----	----	----	----	----	----	----	----	----	----	----	----	----	----	----	0.522131	----	----
VASP	1	----	----	----	----	----	----	----	----	----	----	----	----	----	----	----	----	0.514536	----	----
VCAN	1	----	----	----	----	----	----	----	----	----	----	----	----	----	----	----	----	0.575255	----	----
ZEB2	1	----	----	----	----	----	----	----	----	----	----	----	----	----	----	----	----	0.527092	----	----
ZNF106	1	----	----	----	----	----	----	----	----	----	----	----	----	----	----	----	----	0.585766	----	----
ZNF318	1	----	----	----	----	----	----	----	----	----	----	----	----	----	----	----	----	0.520886	----	----
AFF2	1	----	----	----	----	----	----	----	----	----	----	----	----	----	----	----	----	----	----	0.540026
CEBPE	1	----	----	----	----	----	----	----	----	----	----	----	----	----	----	----	----	----	----	0.562692
CLEC5A	1	----	----	----	----	----	----	----	----	----	----	----	----	----	----	----	----	----	----	0.83107
LPO	1	----	----	----	----	----	----	----	----	----	----	----	----	----	----	----	----	----	----	0.524915
MGAM	1	----	----	----	----	----	----	----	----	----	----	----	----	----	----	----	----	----	----	0.589166
PXK	1	----	----	----	----	----	----	----	----	----	----	----	----	----	----	----	----	----	----	0.501905
S100P	1	----	----	----	----	----	----	----	----	----	----	----	----	----	----	----	----	----	----	0.543654
VSTM1	1	----	----	----	----	----	----	----	----	----	----	----	----	----	----	----	----	----	----	0.501021

## Sheet: Table S8
Table S8. List of primers
Gene	Primer Forward	Primer Reverse
ACTB	TCACCCACACTGTGCCCATCTACGA	CAGCGGAACCGCTCATTGCCAATGG
OR2G2	TGCATATCCATCTCTGCATGG	CCTCGCAGATGAAATGATCC
OR52K1	TGTGTCTCACATAGGTGCCATC	TGGGTGGGAAAAGGAGATAG
OR52K2	TGTCAGCCTCCAATATCACC	CCAGTGTATATGCTAAGCAGAAAG
OR2L5	CCCATCCGTATGAGCAAAAG	GGTGTCTGTACAGGCTAATGTCA
OR2B2	TCAGTTATGGTGGCTGTGTG	AAGCCACTAATCCAGGATGC
OR52H1	GTTTGCCAATCTCTACATTGTTATC	CATCCTGTACCCTTAGAAAACAAA
OR9A4	TGTGTTGTCCAGCTCTTCTTG	ACACCCATGACACAAGAACC
OR2AK2	CAAGCCTGTTCTATGCAACC	CCCCGTCACTTCCTTATTTC
OR52B6	ATTGCCCATCTGTCCTGTTC	TTGGAGGATGTGGATGTAGG
OR13D1	TTAATTGTGCTGAGGGAAGAAAG	ATTTAACATTGGGCTTACCACTC
OR2G3	GATTGGGCAATGAGAGTTCC	TGGTGAAGTTTCCCACAAGG
OR4X2	TTCCTCATTGTGCTCACTGTC	AGCAGATCTGAGATGAGTTTGG
OR2AE1	TGGCAGACTTCATCCTTGAG	GATCGCCATGTGAATTAGGG
OR2L3	GTCTGGTAACAAGTCTATCTCC	GGATGGGATAGTGAAGAGGA
OR10A4	TGCCATCCTCACGTATTTCC	GATGATGGGGTTCAACATGG
OR5C1	GCTTCTTCTGCGATATCCCT	CAGCGATGAAGCCATAAGAC
OR10A2	CTTTGGAGTGGCTGAATGCT	GTTGGTGCCACAGAATGGAA
OR10A5	GGGAAACAGCCTCATCATTC	AGCATTCAGCTACCCCAAAG
OR1L6	TACCTGCGAATCATGGTCAC	TGGACAGGGGCCTAAAATAG
OR13F1	GCTCAGTGGAAGGTCGAAGTA	CATACACCAAAGCCATAAATTTG
P26	GCITA(C/T)GA(C/T)CGITA(C/T)GTIGCIATITG
P27		ACIACIGAIAG(G/A)TGIGAI(G/C)C(G/A)CAIGT
